# Supplementary material for: The organizer of chromatin topology RIF1 ensures cellular resilience to DNA replication stress
Source: Life Sci Alliance. 2023 Feb 6;6(4):e202101186. doi: 10.26508/lsa.202101186 (PMC9906048; doi:10.26508/lsa.202101186)
Supplement: Supplementary file 1 [file LSA-2021-01186_TableS1.xlsx]

## Sheet: SupTable1
Significant	-Log(P-value)	Difference	Majority protein IDs	Protein names	Gene names	Pulse_1	Pulse_2	Pulse_3	Pulse_4	Pulse_5	Pulse_6	Chase_1	Chase_2	Chase_2	Chase_4
+	1.76538	2.40034	P53396	ATP-citrate synthase	ACLY	19.0639	18.5601	18.7813	18.484	18.9606	18.4575	13.4407	17.2594	17.9762	16.5939
+	2.20951	-0.87659	P63261;P60709	Actin, cytoplasmic 2;Actin, cytoplasmic 2, N-terminally processed;Actin, cytoplasmic 1;Actin, cytoplasmic 1, N-terminally processed	ACTG1;ACTB	19.4817	19.3524	19.959	19.3138	19.8573	20.2332	20.9469	20.7619	20.1165	20.4792
+	3.28029	1.34441	O96019	Actin-like protein 6A	ACTL6A	13.386	13.3768	13.4754	13.4992	13.8268	13.0625	11.5816	12.5902	12.4903	11.7114
+	2.1261	3.28093	P55265	Double-stranded RNA-specific adenosine deaminase	ADAR	15.6032	15.3042	14.8841	14.9837	14.2479	14.2661	10.3944	11.0585	14.8839	10.0657
+	2.23161	1.70269	P55263	Adenosine kinase	ADK	12.4604	13.0324	12.6657	13.3851	12.9114	11.3237	10.7122	11.744	11.164	10.0881
+	1.94737	2.45857	Q8N142	Adenylosuccinate synthetase isozyme 1	ADSSL1	14.3968	13.1367	13.4119	13.6976	13.5174	10.8731	10.2438	12.0715	11.021	9.51843
+	3.97298	1.72067	P00568	Adenylate kinase isoenzyme 1	AK1	15.0225	14.55	14.8315	15.162	15.0631	15.0342	12.4499	13.595	13.6249	13.223
+	2.00152	1.95182	P14550	Alcohol dehydrogenase [NADP(+)]	AKR1A1	15.4474	14.9047	14.878	14.9807	15.1349	13.9358	12.9244	13.5898	14.1073	11.0923
+	2.56637	2.08645	O43488	Aflatoxin B1 aldehyde reductase member 2	AKR7A2	13.6569	13.8672	14.0514	13.0713	12.8899	13.3444	12.7842	11.5143	10.1652	11.1112
+	1.82962	3.015	Q9BQI6	Ankyrin repeat domain-containing protein 32	ANKRD32	15.2394	14.8842	15.495	14.7514	15.7916	10.9325	12.3432	11.6846	11.6288	10.3461
+	6.13845	5.38445	Q9NQW6	Actin-binding protein anillin	ANLN	16.7461	16.5966	16.0849	16.9508	16.8983	15.9454	10.3318	10.7233	11.3457	12.2094
+	2.47364	3.60191	P39687	Acidic leucine-rich nuclear phosphoprotein 32 family member A	ANP32A	16.3384	15.784	16.5136	15.9711	16.8938	15.6361	10.4032	13.3764	15.1815	11.3893
+	1.60243	2.79427	Q92688	Acidic leucine-rich nuclear phosphoprotein 32 family member B	ANP32B	14.9693	14.0632	15.698	16.1518	15.8737	14.6286	9.81036	11.1054	14.5174	14.3128
+	4.24219	1.21231	P04083	Annexin A1	ANXA1	19.8566	19.6139	20.2432	19.5472	19.979	19.7432	18.426	18.4341	18.8612	18.7516
+	5.09411	2.99872	P09525	Annexin A4	ANXA4	14.5334	14.1911	13.9475	14.2001	14.3589	13.8914	10.385	11.043	12.0443	11.2811
+	1.82888	1.86058	P27695	DNA-(apurinic or apyrimidinic site) lyase;DNA-(apurinic or apyrimidinic site) lyase, mitochondrial	APEX1	17.674	17.5885	17.8403	17.3872	17.6281	16.674	14.9778	13.9379	17.1317	16.3716
+	2.70634	3.21563	Q9BZZ5	Apoptosis inhibitor 5	API5	16.9075	16.6729	16.7668	16.9245	16.846	16.0048	12.6152	12.0872	16.003	13.1804
+	1.89065	1.48702	P00966	Argininosuccinate synthase	ASS1	17.7191	17.026	17.2103	17.5495	17.7275	17.4705	14.5441	16.0949	17.2864	15.9284
+	2.22636	2.37774	Q9NVM9	Protein asunder homolog	ASUN	12.822	12.1795	13.7159	12.9463	14.4555	12.8413	9.15268	10.6351	12.1241	11.2174
+	4.25749	4.55784	Q96QE3	ATPase family AAA domain-containing protein 5	ATAD5	15.054	14.5008	15.1739	16.3896	15.8789	14.5244	10.9424	12.1024	10.3288	9.40932
+	1.74878	2.49963	Q6VMQ6	Activating transcription factor 7-interacting protein 1	ATF7IP	14.8587	14.3811	14.837	13.2749	13.4019	10.6502	11.2709	11.3771	11.4254	10.1973
+	2.47813	3.11348	P46100	Transcriptional regulator ATRX	ATRX	15.936	15.4076	14.8951	14.0478	14.2933	13.2105	10.321	11.2799	13.5729	10.8991
+	2.26986	3.20858	Q99728	BRCA1-associated RING domain protein 1	BARD1	14.3581	13.9205	13.9124	14.52	14.2359	10.4084	9.30318	10.9998	10.4536	10.646
+	4.91005	5.48021	Q9UIG0	Tyrosine-protein kinase BAZ1B	BAZ1B	18.8686	18.8547	18.604	18.5087	18.8992	17.6701	13.5425	11.4071	14.565	12.8346
+	1.69864	-1.84913	P12694	2-oxoisovalerate dehydrogenase subunit alpha, mitochondrial	BCKDHA	10.0628	8.99934	11.7634	11.7147	9.27145	9.81516	11.949	11.7692	11.9572	12.8057
+	1.58674	3.41786	P54132	Bloom syndrome protein	BLM	15.8466	15.6729	15.5369	15.4903	15.4713	11.6203	9.92095	10.4466	15.0396	10.6803
+	1.7998	2.26723	P30043	Flavin reductase (NADPH)	BLVRB	13.6743	13.5304	13.3469	13.8399	13.6495	11.271	10.4515	12.7958	11.1093	9.44914
+	2.01963	2.14631	P38398	Breast cancer type 1 susceptibility protein	BRCA1	12.3459	12.0538	12.7063	13.1867	14.0949	10.8177	11.1074	9.78388	10.9312	9.72927
+	2.37541	3.78525	O43684	Mitotic checkpoint protein BUB3	BUB3	15.9251	16.2919	16.3346	16.1382	16.7002	15.2669	10.6772	10.4727	15.5155	12.6316
+	3.33538	2.53441	Q9Y224	UPF0568 protein C14orf166	C14orf166	14.5759	14.4595	13.9749	13.9992	14.6919	14.047	10.6606	12.0151	13.0927	11.2596
+	2.1775	1.75285	Q86VP6	Cullin-associated NEDD8-dissociated protein 1	CAND1	18.7579	18.6515	18.4505	18.6503	18.3757	17.7084	16.3444	17.278	17.8192	15.2766
+	2.05705	2.66242	P40121	Macrophage-capping protein	CAPG	15.6281	15.3265	15.7145	16.1897	16.4134	15.3278	11.9084	14.4453	14.9327	11.1305
+	2.97364	1.74008	Q13185	Chromobox protein homolog 3	CBX3	16.9521	16.4375	16.7978	16.3261	16.5996	17.163	14.0696	15.9166	15.1967	14.7075
+	3.72895	1.86728	Q8IX12	Cell division cycle and apoptosis regulator protein 1	CCAR1	12.9363	13.07	12.9621	13.2756	13.7888	13.0258	11.2411	10.8146	11.0201	12.161
+	1.98056	3.05752	Q8N163	Cell cycle and apoptosis regulator protein 2	CCAR2	16.0031	15.9408	15.9924	16.3418	16.1499	15.0741	11.1057	13.1768	15.93	11.2256
+	3.16832	2.21639	P78371	T-complex protein 1 subunit beta	CCT2	17.5683	17.0421	17.5383	17.5948	17.7879	17.0383	14.1327	15.5543	16.3681	14.7924
+	1.70311	1.96381	P48643	T-complex protein 1 subunit epsilon	CCT5	17.2355	16.1741	16.8855	17.8959	17.6145	15.9064	13.6522	14.5366	16.9038	14.8601
+	2.67438	3.8665	P40227	T-complex protein 1 subunit zeta	CCT6A	17.7987	17.2123	17.7014	18.0871	18.0557	17.4497	14.2753	10.853	15.968	14.3076
+	2.82946	4.33773	Q99832	T-complex protein 1 subunit eta	CCT7	17.3815	16.969	17.2516	17.84	18.0109	16.8031	12.3654	11.762	16.3614	11.6643
+	1.94579	1.16106	P50990	T-complex protein 1 subunit theta	CCT8	18.321	17.7767	18.0512	18.6535	18.7052	17.7946	16.5234	16.5687	18.0844	17.0474
+	3.41231	3.01539	Q16543	Hsp90 co-chaperone Cdc37;Hsp90 co-chaperone Cdc37, N-terminally processed	CDC37	13.9936	13.1442	13.6176	13.6666	14.3697	12.697	10.3376	10.8602	11.7989	9.26751
+	3.73083	3.12197	O75419	Cell division control protein 45 homolog	CDC45	13.8752	13.2247	12.6797	14.4442	14.8333	12.8117	10.1213	10.922	10.8294	10.2186
+	2.55752	3.5234	Q99459	Cell division cycle 5-like protein	CDC5L	15.6094	15.2409	15.1175	16.0298	16.3645	14.5379	10.8906	10.6574	14.7765	11.5152
+	2.66619	3.92928	Q6P1J9	Parafibromin	CDC73	15.9152	15.3567	15.6724	16.0754	16.1578	14.8688	10.1926	10.9208	14.9202	10.9467
+	2.59255	2.18527	Q96FF9	Sororin	CDCA5	13.7399	13.6163	13.6069	13.5252	13.6216	12.6746	9.78515	10.8985	12.1261	12.3055
+	1.67445	2.90161	P24941	Cyclin-dependent kinase 2	CDK2	14.6479	14.0177	14.8173	9.88373	13.8092	13.7122	9.50397	10.031	10.9164	11.8676
+	1.67557	2.25367	Q9UEE9	Craniofacial development protein 1	CFDP1	13.5344	12.7942	10.5119	14.194	14.1908	13.6508	10.7607	11.9346	11.043	9.83105
+	2.15846	0.99397	P23528	Cofilin-1	CFL1	18.4638	17.8668	18.2323	18.7526	18.5283	18.0617	16.7435	17.3019	18.0781	17.171
+	5.41141	6.06272	Q13111	Chromatin assembly factor 1 subunit A	CHAF1A	17.7211	17.0824	17.4881	18.0722	18.472	17.3039	10.817	12.4723	12.8428	10.3768
+	4.88147	6.0907	Q13112	Chromatin assembly factor 1 subunit B	CHAF1B	17.1245	17.0031	17.1041	17.8599	17.6226	17.1326	11.1832	10.5367	13.403	9.74543
+	1.71824	2.933	Q96JM3	Chromosome alignment-maintaining phosphoprotein 1	CHAMP1	15.5441	14.8204	14.6174	13.4602	14.861	10.3959	9.99137	10.8628	11.4029	11.8103
+	1.88052	4.46145	Q14839	Chromodomain-helicase-DNA-binding protein 4	CHD4	18.6996	18.7582	18.8242	18.8569	18.7039	17.8314	11.8645	16.3754	17.8607	10.5031
+	6.69208	2.0423	Q9HCK8	Chromodomain-helicase-DNA-binding protein 8	CHD8	13.0904	13.5291	13.4659	13.3829	13.5962	13.4252	11.6165	11.0896	11.4497	11.3349
+	2.52608	4.20026	Q8WVB6	Chromosome transmission fidelity protein 18 homolog	CHTF18	15.4904	11.3833	14.7823	16.3057	16.6686	14.0386	11.2697	10.4396	10.4103	10.1919
+	2.43714	1.59445	O00299	Chloride intracellular channel protein 1	CLIC1	17.1679	16.9521	17.137	17.1138	17.3893	16.8349	14.1276	15.7969	16.3751	15.7193
+	4.47117	4.8174	Q96DG6	Carboxymethylenebutenolidase homolog	CMBL	15.3485	14.9587	15.1589	15.0811	15.1954	13.7875	8.45498	11.5112	10.4801	9.97095
+	1.9722	2.22328	P62633	Cellular nucleic acid-binding protein	CNBP	13.8779	13.4608	13.7903	10.3982	12.9096	12.4596	10.8369	10.5608	10.2715	10.702
+	3.78237	0.860531	Q99829	Copine-1	CPNE1	16.5324	16.6208	16.4508	16.5721	16.5714	16.4567	15.9145	15.6587	15.8897	15.2312
+	2.66128	2.06055	Q9UKF6	Cleavage and polyadenylation specificity factor subunit 3	CPSF3	12.9353	13.0622	13.2533	12.203	12.4805	10.849	10.0893	10.2721	10.783	10.4689
+	3.90947	3.27544	P33240	Cleavage stimulation factor subunit 2	CSTF2	13.6785	11.8076	13.5457	13.8849	14.2858	13.6037	9.57152	10.2429	10.2601	10.6946
+	2.08393	3.08921	Q12996	Cleavage stimulation factor subunit 3	CSTF3	15.1429	14.4929	14.6091	14.7754	14.6033	10.6608	10.7597	11.647	11.1707	10.2553
+	1.90037	2.76139	Q13363	C-terminal-binding protein 1	CTBP1	13.8127	12.7216	14.1277	14.2479	14.3637	10.4137	11.6587	10.6586	10.385	9.37698
+	5.40401	4.08361	P56545	C-terminal-binding protein 2	CTBP2	16.9597	16.7883	16.4881	16.822	16.7839	15.2708	12.573	12.6429	12.7633	11.7617
+	2.30087	2.46788	Q6PD62	RNA polymerase-associated protein CTR9 homolog	CTR9	13.567	10.8445	14.1997	12.6423	13.9444	13.3744	10.864	10.9004	10.0649	10.6807
+	2.91972	4.50016	Q13620	Cullin-4B	CUL4B	16.5696	16.5646	16.659	16.086	16.0225	14.0027	9.72715	11.1188	10.8579	14.2317
+	1.91038	3.63586	Q16531	DNA damage-binding protein 1	DDB1	18.2095	18.386	18.0332	18.5224	18.263	16.7245	15.2263	13.452	17.6587	11.212
+	2.96938	2.18191	Q92499	ATP-dependent RNA helicase DDX1	DDX1	17.5098	17.5726	17.2926	17.4657	17.4986	17.1982	14.491	14.2319	16.5926	15.6485
+	2.58565	2.58591	Q9BUQ8	Probable ATP-dependent RNA helicase DDX23	DDX23	15.5733	14.0346	15.1341	15.2499	16.2079	14.9053	12.9982	10.8349	13.5264	13.0336
+	2.33662	3.07202	O00148	ATP-dependent RNA helicase DDX39A	DDX39A	14.876	14.6813	14.4607	14.342	14.3341	13.1157	10.566	10.7373	13.8947	9.72038
+	1.90362	1.3108	Q13838	Spliceosome RNA helicase DDX39B	DDX39B	18.8568	18.407	18.5613	18.665	19.2065	17.723	16.8456	17.2414	18.3976	16.5519
+	3.77318	3.19333	Q86XP3	ATP-dependent RNA helicase DDX42	DDX42	15.1388	14.2943	14.3842	15.4744	15.184	13.1915	10.616	11.9552	11.5133	11.5869
+	3.30746	3.84688	Q7L014	Probable ATP-dependent RNA helicase DDX46	DDX46	16.4506	16.2076	16.4809	16.6052	16.8772	15.8468	11.6876	13.7837	10.6572	14.1294
+	2.25312	-1.41112	P26196	Probable ATP-dependent RNA helicase DDX6	DDX6	10.4261	10.7633	10.9041	10.1736	11.207	10.6532	11.9157	13.3118	11.4819	11.6866
+	2.80912	4.79074	P35659	Protein DEK	DEK	18.2559	17.51	17.8446	17.4772	18.3165	17.4249	9.66259	14.8457	15.0865	12.4616
+	1.84966	1.9129	O60231	Putative pre-mRNA-splicing factor ATP-dependent RNA helicase DHX16	DHX16	14.8607	13.7077	13.7264	12.7076	13.0227	12.611	10.2996	11.7722	12.9061	11.1278
+	3.91222	4.17127	Q9Y2L1	Exosome complex exonuclease RRP44	DIS3	16.2199	16.2427	16.3095	16.2883	16.1014	15.3474	10.7343	12.4799	13.704	10.7363
+	2.20099	1.50545	O60832	H/ACA ribonucleoprotein complex subunit 4	DKC1	16.4891	15.6174	15.5217	15.3106	16.2106	15.7529	14.4167	13.4592	15.4653	13.9053
+	1.77534	2.14937	P31689	DnaJ homolog subfamily A member 1	DNAJA1	14.5416	14.2018	14.2587	14.4305	14.7593	14.245	11.5956	11.6016	10.9383	14.8916
+	3.65208	3.53087	Q8WXX5	DnaJ homolog subfamily C member 9	DNAJC9	15.9924	15.4849	16.3007	15.3216	15.4928	15.9075	11.2976	11.8774	14.1704	11.531
+	3.24601	6.27023	P26358	DNA (cytosine-5)-methyltransferase 1	DNMT1	20.2817	19.9279	20.1906	20.6578	20.7563	20.191	10.0289	14.1864	16.4826	15.558
+	2.49585	2.57596	Q9NZJ0	Denticleless protein homolog	DTL	13.456	12.9238	11.5642	14.6712	13.9803	12.9354	11.2471	11.401	10.2165	9.85215
+	2.32893	2.03679	P23919	Thymidylate kinase	DTYMK	15.1032	14.9046	14.3804	14.4233	14.3458	15.0962	13.4824	11.6375	11.5844	13.9842
+	2.33465	2.67139	Q5VYK3	Proteasome-associated protein ECM29 homolog	ECM29	14.4071	10.9418	13.4396	13.4491	13.1105	11.9097	9.54787	10.1695	11.1322	9.97013
+	3.88154	-0.737747	P68104;Q5VTE0;Q05639	Elongation factor 1-alpha 1;Putative elongation factor 1-alpha-like 3;Elongation factor 1-alpha 2	EEF1A1;EEF1A1P5;EEF1A2	19.4616	19.5469	19.7551	19.5707	19.5446	19.9549	20.3248	20.5713	20.2537	20.357
+	2.9127	4.02112	Q15029	116 kDa U5 small nuclear ribonucleoprotein component	EFTUD2	16.8693	16.7725	16.6357	16.8933	17.1685	16.5889	10.7491	11.5938	15.389	13.469
+	7.72122	5.42561	Q9H9B1	Histone-lysine N-methyltransferase EHMT1	EHMT1	16.7404	16.3568	16.3977	17.1067	16.9325	16.6134	10.8019	11.2715	11.0436	11.9456
+	6.08118	6.01814	Q96KQ7	Histone-lysine N-methyltransferase EHMT2	EHMT2	17.535	16.9168	16.8757	17.927	17.4506	16.6873	10.3072	10.9325	12.5208	11.0952
+	2.52589	2.03647	P47813;O14602	Eukaryotic translation initiation factor 1A, X-chromosomal;Eukaryotic translation initiation factor 1A, Y-chromosomal	EIF1AX;EIF1AY	13.3712	13.1632	11.1277	13.021	13.1365	12.5552	10.1959	10.9104	11.4343	10.2301
+	3.4465	0.940593	P38919	Eukaryotic initiation factor 4A-III;Eukaryotic initiation factor 4A-III, N-terminally processed	EIF4A3	17.6967	17.305	17.4726	17.1557	17.654	17.493	16.0869	16.57	16.7792	16.6528
+	3.24886	2.30909	Q9BQ52	Zinc phosphodiesterase ELAC protein 2	ELAC2	13.4637	13.5101	14.1705	13.9457	13.3273	13.139	12.0419	10.2267	12.0929	10.7729
+	1.89848	2.2237	Q15717	ELAV-like protein 1	ELAVL1	16.0453	15.9932	16.3198	15.9713	16.4089	16.0506	12.6958	12.1296	15.3529	15.4529
+	3.76407	0.856655	P06733	Alpha-enolase	ENO1	21.3851	21.2929	21.6156	21.5346	21.5806	21.2751	20.6618	20.4257	20.9352	20.3398
+	3.44197	3.83947	Q01780	Exosome component 10	EXOSC10	16.3179	15.5695	15.4783	15.9697	16.0754	15.4227	10.2249	11.0377	13.3009	13.3009
+	1.89601	1.50126	Q9NQT5	Exosome complex component RRP40	EXOSC3	12.0033	12.969	11.7454	13.6733	13.361	12.6609	10.9486	11.4448	12.0664	10.4771
+	3.19875	2.34535	Q9NPD3	Exosome complex component RRP41	EXOSC4	13.8231	13.1904	13.5248	11.4112	12.844	13.2032	10.7568	10.6579	10.5586	10.643
+	1.96251	1.55155	Q5RKV6	Exosome complex component MTR3	EXOSC6	13.5129	11.6696	13.579	13.9498	12.9956	12.7583	11.1332	11.9601	10.9509	12.0597
+	4.55095	2.68831	Q06265	Exosome complex component RRP45	EXOSC9	13.9926	13.1062	13.5356	14.1436	14.2716	13.2511	11.1881	11.3247	10.2935	11.3076
+	4.00337	4.08613	Q96PZ2	Protein FAM111A	FAM111A	14.9155	15.0015	14.4703	15.2171	15.2834	13.8841	10.9158	12.2128	9.10083	10.6074
+	1.72182	2.02662	Q96TA1	Niban-like protein 1	FAM129B	14.8953	13.7842	14.7265	14.1881	12.3752	14.1228	13.5483	10.7802	12.5751	11.0513
+	5.84415	4.17022	Q8IX21	Protein FAM178A	FAM178A	15.0609	14.9238	13.7567	15.0694	15.4279	14.3794	10.5437	10.8899	10.1984	10.7659
+	1.67841	3.49757	Q9BXW9	Fanconi anemia group D2 protein	FANCD2	16.2669	16.3025	15.5831	14.5713	14.2242	10.1912	10.3796	10.9006	12.3288	10.4936
+	2.21827	3.16918	Q9NVI1	Fanconi anemia group I protein	FANCI	19.2646	19.2472	18.6339	18.1262	18.365	16.6028	12.7355	16.1159	16.7352	15.2298
+	2.42859	0.982487	Q8NEZ5	F-box only protein 22	FBXO22	11.5923	12.0441	11.884	12.2954	11.9731	12.031	10.831	11.3056	10.3022	11.5112
+	4.50627	3.4032	P39748	Flap endonuclease 1	FEN1	19.9445	19.4784	19.6141	20.2658	20.2731	19.4216	15.7753	15.9402	17.7455	16.2579
+	2.26162	-1.3461	O75369	Filamin-B	FLNB	15.5442	14.9785	15.7274	15.654	14.2163	15.9595	16.4755	17.112	16.8551	16.3284
+	2.76636	2.73625	Q86YP4	Transcriptional repressor p66-alpha	GATAD2A	12.9937	12.7939	14.1546	14.7137	14.62	12.6996	10.4624	11.4453	11.8629	9.93475
+	1.78	2.76878	Q8WXI9	Transcriptional repressor p66-beta	GATAD2B	13.4773	13.2051	14.5161	14.5708	14.9202	13.5291	10.0088	10.0156	10.6137	14.4325
+	2.97054	2.53811	O76003	Glutaredoxin-3	GLRX3	14.4697	14.5767	14.3538	14.424	14.3002	14.1291	11.0166	11.631	13.6948	11.0075
+	2.14578	5.04859	P49915	GMP synthase [glutamine-hydrolyzing]	GMPS	17.9875	18.0246	18.0137	17.9916	18.6951	17.776	9.87781	14.9876	17.0324	10.2336
+	1.99475	3.75539	Q9BVP2	Guanine nucleotide-binding protein-like 3	GNL3	16.8246	16.4576	16.4629	16.6863	16.9181	16.1845	10.471	15.3515	15.1916	10.3204
+	1.73979	2.14458	Q9BQ67	Glutamate-rich WD repeat-containing protein 1	GRWD1	13.8201	13.8222	14.0786	13.919	13.7294	10.7958	11.2494	10.0825	12.1095	11.4236
+	2.59888	3.55711	P78347	General transcription factor II-I	GTF2I	21.7976	21.76	21.6916	22.4708	22.2968	21.0126	15.7986	18.9688	20.4826	17.8746
+	2.12654	4.11356	Q9UKN8	General transcription factor 3C polypeptide 4	GTF3C4	16.0757	16.1384	16.2531	16.1393	16.0875	14.5344	9.19685	11.2046	15.7493	10.8806
+	2.84811	2.91249	O14929	Histone acetyltransferase type B catalytic subunit	HAT1	14.293	13.1662	14.0902	13.862	14.4424	13.9177	10.4813	13.0251	9.65423	11.037
+	2.29991	4.25005	P51610	Host cell factor 1;HCF N-terminal chain 1;HCF N-terminal chain 2;HCF N-terminal chain 3;HCF N-terminal chain 4;HCF N-terminal chain 5;HCF N-terminal chain 6;HCF C-terminal chain 1;HCF C-terminal chain 2;HCF C-terminal chain 3;HCF C-terminal chain 4;HCF C-terminal chain 5;HCF C-terminal chain 6	HCFC1	16.5459	16.7572	16.6031	17.4781	17.1673	15.2995	11.6278	11.6138	16.2004	10.1252
+	3.12618	3.79159	Q92769	Histone deacetylase 2	HDAC2	16.9002	16.7782	16.935	17.2138	17.2423	16.1891	11.5714	14.6952	14.5002	11.5726
+	2.30445	3.37501	P51858	Hepatoma-derived growth factor	HDGF	16.3703	15.5736	15.2727	16.2803	15.993	14.6793	12.0984	11.463	15.2433	10.4747
+	2.66833	3.37608	Q9NRZ9	Lymphoid-specific helicase	HELLS	14.222	14.586	14.66	14.9608	14.8121	11.1119	11.0359	10.8185	10.6242	10.2524
+	5.37857	3.07978	Q8IUE6	Histone H2A type 2-B	HIST2H2AB	15.4099	15.3323	15.4529	15.5464	15.0887	14.4243	11.641	12.7398	11.9445	12.1919
+	2.19302	3.0274	Q14527	Helicase-like transcription factor	HLTF	15.6847	15.4488	15.5093	15.5909	16.2162	15.3711	11.5975	15.3108	12.976	10.5534
+	3.41377	5.07173	P09429	High mobility group protein B1	HMGB1	17.829	17.6188	16.907	17.6964	18.0002	16.8213	13.4679	10.3703	14.8307	10.9594
+	3.43277	3.31027	P26583	High mobility group protein B2	HMGB2	14.9795	14.2718	12.6848	13.9344	15.5809	14.3417	11.7042	10.8038	11.2459	10.2004
+	2.08173	4.50201	Q13151	Heterogeneous nuclear ribonucleoprotein A0	HNRNPA0	16.3247	15.9979	16.6962	16.3097	16.9805	15.1003	10.0464	9.61587	16.4091	10.8601
+	2.33135	1.71761	Q99729	Heterogeneous nuclear ribonucleoprotein A/B	HNRNPAB	17.4712	16.9294	16.8303	17.1581	17.6132	16.6263	14.923	14.6283	16.8616	15.1356
+	2.28345	1.30061	Q14103	Heterogeneous nuclear ribonucleoprotein D0	HNRNPD	18.7856	18.4923	18.4431	18.6865	18.9404	18.2029	16.7892	17.2609	18.423	16.6918
+	2.75065	2.13418	P14866	Heterogeneous nuclear ribonucleoprotein L	HNRNPL	17.4915	17.339	17.231	17.1665	17.8786	17.4691	14.4939	14.5591	16.918	15.2094
+	2.59703	3.44252	P34932	Heat shock 70 kDa protein 4	HSPA4	15.9885	14.1766	15.851	15.9834	16.1424	15.4119	11.1514	12.4164	14.5297	10.5017
+	3.06658	4.2536	Q7Z6Z7	E3 ubiquitin-protein ligase HUWE1	HUWE1	16.6118	16.0891	15.4733	17.3293	16.7087	15.2045	10.5715	12.7122	14.1989	10.4475
+	3.04862	-2.26836	O43837	Isocitrate dehydrogenase [NAD] subunit beta, mitochondrial	IDH3B	10.2178	10.6379	11.2797	10.2332	10.1067	10.5333	13.8642	12.6655	11.5267	13.0229
+	2.21931	3.46177	Q16666	Gamma-interferon-inducible protein 16	IFI16	16.5493	12.8695	13.9572	15.8387	16.6738	15.5723	10.5598	11.8544	13.6087	11.1039
+	1.68545	2.22896	Q13123	Protein Red	IK	14.1111	13.3014	13.7224	10.9422	13.9124	11.2391	9.55718	11.1543	10.8553	11.0032
+	3.13761	2.4272	Q9H0C8	Integrin-linked kinase-associated serine/threonine phosphatase 2C	ILKAP	13.1169	13.4353	13.2161	13.9282	12.8696	11.4589	10.7341	10.0682	10.4543	11.0512
+	1.92472	1.6359	O00410	Importin-5	IPO5	14.6978	14.2366	13.3353	13.052	13.5304	13.6183	10.9899	11.5521	12.7614	13.1333
+	1.96943	3.99979	O60341	Lysine-specific histone demethylase 1A	KDM1A	17.622	17.4255	17.2733	17.5409	17.1432	15.7223	11.0659	14.6011	16.4906	10.328
+	3.31981	2.6552	Q8N8K9	Uncharacterized protein KIAA1958	KIAA1958	13.2784	13.8186	13.919	13.3624	13.2105	12.0819	11.2832	9.91486	9.88933	11.4056
+	1.76339	2.47439	Q02241	Kinesin-like protein KIF23	KIF23	15.5091	10.9388	13.3844	14.594	14.6626	13.9488	11.0022	11.0776	11.8016	11.5796
+	3.17746	3.37946	O95239	Chromosome-associated kinesin KIF4A	KIF4A	15.2032	15.3979	15.5406	15.6583	15.2703	13.8019	11.2499	10.5351	13.6324	11.6463
+	2.98808	2.9138	Q16719	Kynureninase	KYNU	14.9405	14.35	14.6568	14.4194	14.006	12.1532	11.1054	11.4982	11.8672	10.2246
+	3.0181	1.08735	P00338	L-lactate dehydrogenase A chain	LDHA	20.9528	20.7965	20.8416	20.6156	20.912	20.0886	19.5138	19.5466	20.106	19.289
+	5.04742	6.50547	P18858	DNA ligase 1	LIG1	17.7756	16.9962	17.6002	18.1141	18.9987	17.3121	13.2653	11.0618	10.0161	10.8328
+	7.50116	5.08085	P49916	DNA ligase 3	LIG3	15.961	15.3911	15.6796	16.046	15.8392	15.2046	10.2599	11.2256	10.6599	10.2788
+	2.44871	2.98216	Q5T3J3	Ligand-dependent nuclear receptor-interacting factor 1	LRIF1	15.3942	15.0218	15.0645	14.939	15.0649	13.2571	11.1681	9.91806	13.3549	12.7912
+	1.81297	3.69592	P09960	Leukotriene A-4 hydrolase	LTA4H	16.2696	14.0391	15.346	15.8676	16.0582	14.9655	10.1759	10.5014	16.0015	10.2349
+	2.14934	3.1342	O75608	Acyl-protein thioesterase 1	LYPLA1	14.6441	14.0332	14.0556	14.0122	14.0211	14.7769	13.9948	9.63694	11.5695	9.29072
+	2.21609	3.74467	P31153	S-adenosylmethionine synthase isoform type-2	MAT2A	15.0545	13.8026	15.2607	15.4353	16.7473	14.6537	9.28473	10.3248	14.4545	11.5933
+	4.91388	3.29527	Q9NZL9	Methionine adenosyltransferase 2 subunit beta	MAT2B	14.6276	13.818	14.5305	15.0458	15.1922	14.175	11.448	10.8762	11.9889	10.7652
+	2.00174	-1.56612	Q96RQ3	Methylcrotonoyl-CoA carboxylase subunit alpha, mitochondrial	MCCC1	18.6837	18.7443	18.8792	18.5308	17.8456	19.5019	21.1825	20.3199	18.9343	20.6179
+	3.45777	4.67669	P49736	DNA replication licensing factor MCM2	MCM2	18.2101	17.3759	18.5039	18.5658	18.8609	17.3671	12.3605	11.7099	15.7596	14.0523
+	2.81244	4.10575	P25205	DNA replication licensing factor MCM3	MCM3	18.7614	18.7044	18.769	19.3992	19.4514	18.1814	12.8989	14.1908	17.8224	14.1761
+	2.43628	4.38096	P33991	DNA replication licensing factor MCM4	MCM4	17.1379	17.2882	17.3978	17.8295	17.7218	16.027	12.7496	11.8048	16.4745	10.3821
+	1.77985	3.63915	P33992	DNA replication licensing factor MCM5	MCM5	18.1312	18.1572	17.9374	18.9962	18.9072	17.7632	10.7926	14.4903	17.9744	15.4477
+	3.17276	5.11503	Q14566	DNA replication licensing factor MCM6	MCM6	17.721	17.5312	17.8878	18.9395	18.9695	17.387	11.9899	13.1692	15.9524	10.7191
+	1.86399	3.76468	P33993	DNA replication licensing factor MCM7	MCM7	18.9085	18.8452	19.0346	19.9332	19.4848	18.1964	15.7364	11.6499	18.7858	15.0377
+	4.01035	3.40055	Q9BTE3	Mini-chromosome maintenance complex-binding protein	MCMBP	13.7314	13.7056	14.1419	14.1355	14.4408	12.9202	10.8509	11.326	9.03817	10.5664
+	2.42588	3.66986	Q9NU22	Midasin	MDN1	14.5094	13.8717	14.3332	13.5955	14.7941	10.6063	8.92162	11.546	10.0321	9.2943
+	4.82527	4.31035	Q6ZRQ5	Protein MMS22-like	MMS22L	15.0836	15.1868	14.6875	14.8525	14.6935	13.056	9.4004	10.4257	10.794	10.5119
+	3.18998	0.976548	Q9H8S9;Q7L9L4	MOB kinase activator 1A;MOB kinase activator 1B	MOB1A;MOB1B	11.2291	11.1704	11.125	10.8768	11.5453	10.9813	10.1121	10.6795	10.0336	9.88717
+	2.2025	2.98279	Q14149	MORC family CW-type zinc finger protein 3	MORC3	16.0339	14.3147	14.4633	11.4454	14.2037	12.7066	10.9375	10.6858	11.0685	10.8221
+	5.77595	6.88474	P49959	Double-strand break repair protein MRE11A	MRE11A	18.7296	18.2473	18.2869	18.5643	19.032	18.0875	10.884	11.7819	13.3971	10.363
+	2.1122	-2.30554	Q5T653	39S ribosomal protein L2, mitochondrial	MRPL2	10.1903	10.4127	10.6674	10.1174	12.1573	10.7775	13.9025	12.4324	11.4326	14.3364
+	3.68661	6.30796	P43246	DNA mismatch repair protein Msh2	MSH2	21.8182	21.4982	21.6034	22.3903	22.3488	21.1308	13.2523	14.6767	18.8882	15.1442
+	6.30783	6.52217	P20585	DNA mismatch repair protein Msh3	MSH3	19.0303	17.6904	18.6604	19.0804	19.4164	17.5964	11.784	12.6992	12.3157	11.4286
+	4.49161	6.21046	P52701	DNA mismatch repair protein Msh6	MSH6	21.7602	21.2701	21.3597	21.8264	22.097	21.0698	13.1124	16.3435	17.2219	14.7358
+	3.20548	2.29398	Q13330	Metastasis-associated protein MTA1	MTA1	13.6509	12.6183	13.4957	13.1797	13.5227	11.8822	9.99918	10.5752	11.2513	11.2314
+	2.16339	3.84635	O94776	Metastasis-associated protein MTA2	MTA2	17.5573	17.6771	17.8741	17.8394	17.8169	16.9946	9.95353	14.6871	16.1054	14.3748
+	1.96747	1.2692	Q9HC84	Mucin-5B	MUC5B	11.7151	12.3407	12.0587	11.5517	10.9044	11.8584	10.2033	11.022	11.1008	9.54976
+	2.42438	2.12153	Q9BQG0	Myb-binding protein 1A	MYBBP1A	15.2833	14.2816	14.6281	13.8927	14.6296	14.8998	12.6662	13.2104	13.2815	10.7659
+	2.0625	1.92346	Q96RE7	Nucleus accumbens-associated protein 1	NACC1	14.5771	14.4157	14.2747	15.1715	13.9196	13.5134	11.9241	11.5755	14.179	11.8755
+	1.83691	2.31252	P43490	Nicotinamide phosphoribosyltransferase	NAMPT	18.6622	15.2073	16.5266	17.1575	18.5045	17.6342	13.7077	15.1151	15.5409	15.5144
+	2.02718	1.98915	Q9NR45	Sialic acid synthase	NANS	13.6626	13.4107	11.9351	11.6542	13.8358	13.3965	11.3741	9.72681	11.308	11.5643
+	4.09886	4.79276	P49321	Nuclear autoantigenic sperm protein	NASP	14.9233	14.1407	15.247	17.0106	16.9674	15.2996	10.1133	11.7622	10.494	10.8518
+	2.22137	1.67811	Q9H0A0	N-acetyltransferase 10	NAT10	16.3034	16.1918	16.7796	16.1664	16.0921	16.0518	13.6199	14.2953	16.1569	14.2723
+	6.85911	6.17625	O60934	Nibrin	NBN	17.3775	16.4387	17.0567	17.8044	17.7474	16.2606	11.19	11.2104	10.8896	10.4619
+	4.11939	3.57407	Q09161	Nuclear cap-binding protein subunit 1	NCBP1	16.0363	15.25	15.8488	15.271	15.0535	14.2839	11.6165	11.1006	13.0466	11.1024
+	2.43648	0.999853	P19338	Nucleolin	NCL	20.5893	20.1118	20.4228	19.9745	20.4902	20.4403	18.8407	19.0649	20.0849	19.3627
+	2.50322	4.69177	O75376	Nuclear receptor corepressor 1	NCOR1	16.2881	16.0942	15.7571	15.8655	16.6854	11.2858	10.8293	11.7379	11.0176	8.96557
+	2.22541	2.44191	Q9H3P2	Negative elongation factor A	NELFA	12.7036	12.7857	13.031	13.6776	13.8681	11.1381	11.4925	9.79043	11.2022	9.21668
+	2.96661	3.64534	Q8WX92	Negative elongation factor B	NELFB	15.3144	14.839	14.6345	14.6792	16.1	15.4471	9.99449	11.725	13.8352	10.5401
+	2.55399	0.66434	P55769	NHP2-like protein 1;NHP2-like protein 1, N-terminally processed	NHP2L1	13.9966	14.5522	14.4242	14.0941	14.5255	14.4876	13.6919	13.5359	14.026	13.4757
+	2.04139	2.10635	Q6KC79	Nipped-B-like protein	NIPBL	13.8735	13.3651	13.4977	13.5407	13.5042	11.2501	11.1706	11.8949	11.4852	9.71152
+	3.40383	2.68952	P40261	Nicotinamide N-methyltransferase	NNMT	14.7937	14.1711	14.6575	15.1749	15.093	13.9668	12.6193	12.9455	11.3526	10.8957
+	2.63991	2.56436	P46087	Probable 28S rRNA (cytosine(4447)-C(5))-methyltransferase	NOP2	14.739	14.5386	14.2842	14.0875	14.5454	14.476	11.8038	13.9437	10.7607	11.0148
+	2.10979	2.73967	O00567	Nucleolar protein 56	NOP56	15.9896	15.7354	15.6328	15.6409	15.9972	15.3754	13.5222	13.176	14.9442	10.313
+	2.06959	3.71438	Q08J23	tRNA (cytosine(34)-C(5))-methyltransferase	NSUN2	16.0343	14.9099	15.8505	16.7333	16.4823	16.1431	12.5125	10.3938	15.8978	10.4407
+	1.96601	2.37304	O43809	Cleavage and polyadenylation specificity factor subunit 5	NUDT21	14.9841	14.9064	14.6715	13.9113	15.0992	13.9464	10.7805	10.8685	14.2329	12.9719
+	2.64273	4.23713	Q14980	Nuclear mitotic apparatus protein 1	NUMA1	19.661	19.6998	19.6111	19.7502	19.9416	18.6873	12.0558	16.4041	17.5492	15.2763
+	3.10987	2.90857	Q9BXS6	Nucleolar and spindle-associated protein 1	NUSAP1	15.247	14.7252	15.1275	13.8078	15.2306	13.6641	11.2059	12.8105	12.3599	10.5243
+	1.72011	2.17907	Q9UBU9	Nuclear RNA export factor 1	NXF1	14.6609	13.8879	13.9759	15.8362	15.581	13.3404	11.0384	11.3345	13.4017	13.6974
+	3.40106	1.82539	P68402	Platelet-activating factor acetylhydrolase IB subunit beta	PAFAH1B2	13.375	13.7767	13.5978	12.8547	12.9138	12.6786	11.3422	11.3857	12.0529	10.7154
+	2.49813	2.27069	P09874	Poly [ADP-ribose] polymerase 1	PARP1	20.5092	20.3576	20.2466	20.5665	20.7369	19.7157	16.7197	18.2224	19.8068	17.59
+	2.00211	1.97556	Q15366	Poly(rC)-binding protein 2	PCBP2	17.2706	17.1021	17.4922	17.0868	17.4901	16.6077	14.4524	13.6709	16.8919	15.7823
+	6.58731	4.90891	P12004	Proliferating cell nuclear antigen	PCNA	21.3507	21.1522	21.3391	21.8557	22.0213	20.8059	15.7904	16.5653	17.0666	16.6254
+	6.41593	5.69212	Q53EL6	Programmed cell death protein 4	PDCD4	16.5995	16.6157	16.797	16.6918	16.3887	15.928	11.0064	11.9517	10.2916	9.99555
+	2.14076	2.46745	O75340	Programmed cell death protein 6	PDCD6	15.0242	14.9007	14.635	14.7788	14.9854	15.1888	10.674	11.2673	13.9903	13.8739
+	4.40013	4.62314	Q29RF7	Sister chromatid cohesion protein PDS5 homolog A	PDS5A	16.74	17.084	16.5783	16.5449	16.3441	14.8345	11.597	11.1751	13.2178	10.9348
+	3.56193	4.41995	Q9NTI5	Sister chromatid cohesion protein PDS5 homolog B	PDS5B	16.3876	16.1865	15.6623	15.0493	15.7301	13.5714	10.0957	9.86115	12.4869	11.6013
+	2.18605	3.28605	P30086	Phosphatidylethanolamine-binding protein 1;Hippocampal cholinergic neurostimulating peptide	PEBP1	15.8512	15.6142	16.0369	16.5061	16.3084	16.0124	13.5696	9.45044	14.3836	13.6717
+	3.05706	1.41066	P17858	ATP-dependent 6-phosphofructokinase, liver type	PFKL	12.6509	12.7216	12.296	11.579	12.5215	12.5625	10.687	11.6061	10.8937	10.7249
+	2.70694	0.648437	P07737	Profilin-1	PFN1	18.6215	18.4311	18.8232	18.7754	18.7531	18.2655	17.8074	17.8194	18.2893	17.9368
+	3.78022	2.65963	P18669;P15259;Q8N0Y7	Phosphoglycerate mutase 1;Phosphoglycerate mutase 2;Probable phosphoglycerate mutase 4	PGAM1;PGAM2;PGAM4	13.3635	13.619	13.2133	13.859	14.6484	12.6012	10.9509	10.4812	10.5605	11.5716
+	4.44415	3.5042	P52209	6-phosphogluconate dehydrogenase, decarboxylating	PGD	16.2698	16.0396	15.5784	15.2334	15.9897	15.7858	12.1402	11.536	13.7151	11.8563
+	4.45207	1.4257	P00558	Phosphoglycerate kinase 1	PGK1	23.3809	23.2079	23.3506	23.1036	23.5147	22.9655	21.7187	21.6641	22.3504	21.5794
+	1.72817	1.83588	O95336	6-phosphogluconolactonase	PGLS	11.8255	11.6318	13.1202	11.2246	13.0943	13.1266	9.30796	11.8133	10.9546	9.92929
+	3.61378	2.80407	O94880	PHD finger protein 14	PHF14	14.2451	13.7141	13.6305	13.1007	13.6178	11.9259	10.9046	9.94799	10.9785	10.442
+	1.87134	1.90131	O75928	E3 SUMO-protein ligase PIAS2	PIAS2	12.3826	11.0484	13.1969	12.3906	12.8998	12.7974	8.96739	11.7861	10.6409	10.8109
+	1.84757	2.60342	Q9H307	Pinin	PNN	14.1133	14.921	14.0775	12.2331	13.8894	10.5063	10.7584	10.9968	10.5183	10.4732
+	3.02209	4.57938	Q7Z3K3	Pogo transposable element with ZNF domain	POGZ	15.8016	16.109	16.0274	15.7232	16.0758	13.1797	8.49291	11.3971	12.6323	11.1046
+	5.04939	7.25597	P09884	DNA polymerase alpha catalytic subunit	POLA1	18.4452	17.9879	18.0748	19.1156	19.2644	17.9142	9.77404	10.9762	13.6253	10.4687
+	4.16157	4.86959	Q14181	DNA polymerase alpha subunit B	POLA2	16.3135	16.0368	16.5684	17.138	17.3286	14.8034	10.0034	11.8142	12.7712	11.392
+	3.5357	7.24659	P28340	DNA polymerase delta catalytic subunit	POLD1	20.8328	20.5645	20.4195	21.4514	21.2801	20.2883	13.3176	16.0526	15.3683	9.49961
+	2.87911	5.46532	P49005	DNA polymerase delta subunit 2	POLD2	18.1065	17.83	17.6975	18.3915	18.5343	17.2389	9.82841	14.2507	15.5033	10.4221
+	5.4832	6.61142	Q15054	DNA polymerase delta subunit 3	POLD3	18.0292	17.1255	17.46	17.7892	18.6327	17.3269	9.17913	11.7508	11.6894	11.844
+	4.16998	5.55814	Q07864	DNA polymerase epsilon catalytic subunit A	POLE	17.3015	16.0051	16.0911	17.7948	18.5542	14.672	10.882	11.7904	11.0633	10.9775
+	3.71758	1.07863	P62937	Peptidyl-prolyl cis-trans isomerase A;Peptidyl-prolyl cis-trans isomerase A, N-terminally processed	PPIA	20.389	20.1257	20.4104	20.5254	20.7248	20.4041	19.0444	19.4132	19.7995	19.148
+	2.2798	2.71326	O15355	Protein phosphatase 1G	PPM1G	14.9913	11.5233	14.5516	14.4223	15.3256	13.6892	11.7879	11.0988	11.0446	11.5513
+	5.05273	3.73232	Q9Y570	Protein phosphatase methylesterase 1	PPME1	13.6956	13.8886	14.4742	14.0756	14.6649	13.1674	10.6678	10.525	10.5511	9.30438
+	3.41811	3.53799	O43663	Protein regulator of cytokinesis 1	PRC1	15.2869	15.5445	14.6457	15.4325	15.9103	14.2391	11.2711	13.5715	10.7914	10.92
+	6.44078	6.33789	P49642	DNA primase small subunit	PRIM1	16.5753	16.5303	16.5791	16.8485	17.4698	16.1907	9.08332	10.8531	11.1127	10.3952
+	7.56059	6.93612	P49643	DNA primase large subunit	PRIM2	17.7957	17.7344	17.6216	18.3304	18.5875	17.2799	10.5978	11.5783	11.2595	10.3864
+	2.3591	2.10928	P78527	DNA-dependent protein kinase catalytic subunit	PRKDC	22.3405	22.2475	21.9937	22.4654	22.4544	21.3916	18.5515	20.0164	21.6151	19.9752
+	2.73872	3.90545	Q99873	Protein arginine N-methyltransferase 1	PRMT1	16.2674	16.4445	16.205	15.9862	16.2628	15.4778	13.0318	10.8433	14.7858	10.1464
+	1.80571	2.82222	Q9UMS4	Pre-mRNA-processing factor 19	PRPF19	16.7013	16.4673	16.2482	17.0191	17.1747	15.4548	14.6571	11.1081	16.1592	12.8304
+	2.79681	2.80645	O43395	U4/U6 small nuclear ribonucleoprotein Prp3	PRPF3	14.7009	13.7024	13.7863	14.6282	14.683	12.6787	9.77852	11.0382	12.3902	11.687
+	2.25279	2.03551	Q8WWY3	U4/U6 small nuclear ribonucleoprotein Prp31	PRPF31	12.4223	11.189	12.841	13.4979	12.8602	12.0668	10.9214	9.0816	10.9755	10.7976
+	3.73014	2.86929	O94906	Pre-mRNA-processing factor 6	PRPF6	13.6947	13.7342	14.0701	14.0997	15.2187	13.4303	11.6648	10.3122	10.763	11.948
+	4.10237	4.53204	Q6P2Q9	Pre-mRNA-processing-splicing factor 8	PRPF8	17.6411	17.1983	17.0541	17.127	17.667	16.5039	12.2537	12.7866	14.5628	11.0631
+	2.77982	3.84304	O75475	PC4 and SFRS1-interacting protein	PSIP1	15.484	11.1547	14.8679	14.4186	14.8512	14.7417	9.61597	10.9065	10.3167	10.8007
+	2.62953	2.24585	O00231	26S proteasome non-ATPase regulatory subunit 11	PSMD11	13.1438	13.1453	13.1796	11.0887	13.2271	13.1857	9.78203	10.8537	11.3742	10.3201
+	1.69537	1.88555	Q13200	26S proteasome non-ATPase regulatory subunit 2	PSMD2	12.0262	11.0138	12.9047	12.7886	13.7038	13.1783	9.4067	12.1028	10.6987	10.6598
+	3.27989	4.66155	Q16401	26S proteasome non-ATPase regulatory subunit 5	PSMD5	17.022	16.7837	16.6639	15.5659	16.9529	16.2227	13.9628	10.7171	13.1038	9.71077
+	2.2982	2.84316	P61289	Proteasome activator complex subunit 3	PSME3	15.4166	15.4001	14.904	15.6884	16.0936	15.2145	10.5885	13.7097	14.4923	11.6483
+	2.03675	2.50118	O95456	Proteasome assembly chaperone 1	PSMG1	14.1781	11.8986	14.0472	13.6749	13.2393	10.6813	10.4775	10.9195	10.653	9.75829
+	4.95771	3.51258	Q15185	Prostaglandin E synthase 3	PTGES3	14.6904	14.3641	14.5973	14.5514	14.8303	13.6021	11.8561	10.7166	11.0223	10.1118
+	3.25725	3.8265	Q96PZ0	Pseudouridylate synthase 7 homolog	PUS7	15.8396	15.7227	15.4291	16.8158	16.4782	14.9852	10.2557	11.4046	12.8906	13.657
+	2.03562	2.25367	O60671	Cell cycle checkpoint protein RAD1	RAD1	14.492	12.8079	13.5873	13.1602	13.4745	11.0198	10.8563	11.1687	11.5206	9.80075
+	5.37609	4.2884	Q9NS91	E3 ubiquitin-protein ligase RAD18	RAD18	15.243	15.0991	16.2337	16.1075	16.3589	15.8096	10.862	11.6419	12.4743	11.1027
+	1.83612	2.86398	O60216	Double-strand-break repair protein rad21 homolog	RAD21	16.0827	14.7473	15.2605	16.5214	16.1315	13.7593	10.6473	12.3826	15.194	11.9886
+	3.99387	6.61069	Q92878	DNA repair protein RAD50	RAD50	20.1842	19.8377	19.3395	20.0962	20.731	19.4929	11.9723	11.0994	16.1344	14.1388
+	2.77646	2.04305	Q09028	Histone-binding protein RBBP4	RBBP4	12.7956	13.0532	13.1022	13.0574	13.3865	11.6347	9.83237	10.6167	11.6841	11.0477
+	2.62721	2.98033	Q16576	Histone-binding protein RBBP7	RBBP7	17.4301	17.169	17.4103	17.5587	17.926	17.009	12.5739	14.5749	16.6067	13.9919
+	2.80306	2.57507	P98175	RNA-binding protein 10	RBM10	12.9341	12.8622	12.6778	13.7376	13.4529	12.7562	9.50241	11.825	9.30519	11.3477
+	1.79841	3.32078	Q14498	RNA-binding protein 39	RBM39	16.2198	15.8125	16.0443	14.749	16.3809	15.8632	9.72569	15.7049	11.0836	13.5825
+	1.71257	2.45015	Q9P258	Protein RCC2	RCC2	18.8476	18.56	18.6271	18.6824	18.6986	17.6362	13.4379	17.1916	18.0926	15.5119
+	2.57949	4.12928	Q9UKL0	REST corepressor 1	RCOR1	15.4012	15.2829	15.1229	15.2859	15.4319	10.8453	10.3446	10.896	10.8849	9.60406
+	2.59869	2.54243	P46063	ATP-dependent DNA helicase Q1	RECQL	17.4937	17.1988	16.8122	17.6331	17.6525	16.4943	13.1699	14.437	16.457	14.6227
+	1.96485	1.77564	O94762	ATP-dependent DNA helicase Q5	RECQL5	13.6473	12.9923	11.5386	13.924	13.6405	13.7764	11.685	11.7147	12.0678	10.4427
+	6.0325	7.63045	P35251	Replication factor C subunit 1	RFC1	19.1423	19.4338	19.4205	19.7439	20.1923	18.9353	10.655	11.1513	13.6734	11.9106
+	3.61467	4.70748	P35250	Replication factor C subunit 2	RFC2	18.1382	18.3169	18.1548	18.8187	19.0492	17.7889	15.11	11.0357	14.3773	14.1582
+	6.08712	6.33416	P40938	Replication factor C subunit 3	RFC3	17.9629	17.6841	17.5815	17.8302	18.7937	17.7763	10.5865	11.1248	11.7144	12.9901
+	4.81419	6.18395	P35249	Replication factor C subunit 4	RFC4	19.2588	19.1387	19.2759	19.7949	19.866	18.6935	12.2242	12.6208	15.5347	12.2364
+	4.25046	5.47672	P40937	Replication factor C subunit 5	RFC5	18.6817	18.2738	18.5451	19.0059	19.0592	17.8136	15.2009	13.3556	12.6586	11.1309
+	4.24572	4.56729	Q5UIP0	Telomere-associated protein RIF1	RIF1	16.9699	15.8882	15.9083	16.4706	17.2406	14.7795	11.6699	12.9657	11.2121	10.7213
+	1.69913	2.41551	O75792	Ribonuclease H2 subunit A	RNASEH2A	14.1949	14.1154	12.201	10.8208	14.8846	13.9817	10.2972	10.7975	10.7198	11.9889
+	2.65696	2.35342	Q5TBB1	Ribonuclease H2 subunit B	RNASEH2B	13.3935	10.9767	13.6686	13.5111	13.6149	12.8975	10.4858	10.6493	10.8758	10.617
+	1.7862	1.90978	P13489	Ribonuclease inhibitor	RNH1	14.73	13.5909	14.6659	15.0056	14.9689	14.6948	13.057	10.7108	14.177	12.8535
+	2.5412	2.96173	P27694	Replication protein A 70 kDa DNA-binding subunit;Replication protein A 70 kDa DNA-binding subunit, N-terminally processed	RPA1	19.8282	19.4188	19.4342	20.4714	20.6752	19.3993	18.2358	15.3684	18.3638	15.6699
+	3.08462	5.17759	P15927	Replication protein A 32 kDa subunit	RPA2	17.2948	17.11	16.9945	17.3662	17.4806	16.2419	14.1532	10.2404	13.8514	9.37004
+	4.32983	4.09346	Q96P16	Regulation of nuclear pre-mRNA domain-containing protein 1A	RPRD1A	15.6776	14.8287	14.8857	14.5339	15.2246	13.1502	9.98819	11.067	11.35	10.0882
+	2.62883	2.50788	Q92766	Ras-responsive element-binding protein 1	RREB1	14.1016	13.2295	13.6616	13.4826	13.9938	11.1897	11.2478	10.9377	10.65	10.2387
+	2.81802	3.33064	Q9Y3I0	tRNA-splicing ligase RtcB homolog	RTCB	14.6436	13.6726	14.4806	14.9826	15.533	13.0206	12.867	10.8057	9.59739	10.9627
+	2.39836	1.67897	Q92541	RNA polymerase-associated protein RTF1 homolog	RTF1	14.5881	14.0605	13.639	14.1801	14.0283	13.2223	13.5821	11.8792	11.8824	11.7526
+	1.84211	1.93553	Q9Y265	RuvB-like 1	RUVBL1	17.5306	17.2417	17.1979	16.7224	16.6857	16.3888	13.1087	14.6577	16.3718	15.9644
+	3.21976	1.58625	P82979	SAP domain-containing ribonucleoprotein	SARNP	15.8136	15.5122	15.545	15.1212	15.9873	14.936	13.7562	14.0723	14.5064	13.2634
+	2.31368	2.35644	O43290	U4/U6.U5 tri-snRNP-associated protein 1	SART1	13.5584	13.6512	11.2028	14.1329	14.3175	13.8763	10.6078	10.9048	11.1593	11.7283
+	3.76525	3.69328	Q15020	Squamous cell carcinoma antigen recognized by T-cells 3	SART3	16.5537	16.0461	16.3433	16.5434	17.1187	15.8833	12.6445	12.1358	14.5549	11.5507
+	3.30971	5.17776	Q01105;P0DME0	Protein SET;Protein SETSIP	SET;SETSIP	16.6505	16.3059	16.2196	15.5813	16.826	16.1413	9.39741	13.8395	12.0781	9.12362
+	2.16067	3.20728	Q15637	Splicing factor 1	SF1	15.6747	15.8392	15.5128	15.1041	15.8282	15.3278	10.3539	12.665	15.33	11.0132
+	4.38072	3.56294	Q12874	Splicing factor 3A subunit 3	SF3A3	14.0509	14.109	14.2923	14.7825	14.5161	13.5231	9.80254	11.9319	10.0041	10.859
+	1.79484	2.01193	O75533	Splicing factor 3B subunit 1	SF3B1	15.9896	16.1454	13.7477	14.8947	16.0428	14.2487	12.8846	11.9527	14.3623	13.4653
+	1.71922	3.03782	Q13435	Splicing factor 3B subunit 2	SF3B2	14.6774	10.7108	12.5598	15.4709	15.9318	14.1022	10.5928	11.8857	10.7225	10.283
+	1.99208	3.44009	Q15393	Splicing factor 3B subunit 3	SF3B3	17.3857	17.2378	17.4502	17.7442	17.4312	16.822	10.5474	13.77	16.7636	14.5393
+	2.62075	-1.02344	P34896	Serine hydroxymethyltransferase, cytosolic	SHMT1	14.4302	14.3632	14.776	14.1136	14.4315	15.2554	15.6966	15.8616	15.1795	15.6027
+	6.76234	5.31394	P42285	Superkiller viralicidic activity 2-like 2	SKIV2L2	16.0662	15.9935	16.163	16.0562	16.0977	15.3405	10.3371	10.5053	11.6602	10.053
+	2.17561	2.13186	Q02978	Mitochondrial 2-oxoglutarate/malate carrier protein	SLC25A11	13.7683	13.9842	12.4639	13.1265	13.5341	14.8667	10.8841	11.6791	10.5133	12.8918
+	2.73146	5.46943	O60264	SWI/SNF-related matrix-associated actin-dependent regulator of chromatin subfamily A member 5	SMARCA5	19.7935	19.7301	19.7318	19.2746	19.9211	19.0919	10.9124	15.1642	17.7908	12.617
+	1.79113	3.20003	Q9H4L7	SWI/SNF-related matrix-associated actin-dependent regulator of chromatin subfamily A containing DEAD/H box 1	SMARCAD1	15.7331	13.4724	14.2158	14.3849	14.7354	10.4257	9.87691	10.6785	12.3766	9.57945
+	4.2535	3.09878	Q8TAQ2	SWI/SNF complex subunit SMARCC2	SMARCC2	14.9575	14.6411	14.2845	14.739	15.1439	13.6883	11.5248	12.4147	10.5689	11.3992
+	1.91759	2.89004	Q14683	Structural maintenance of chromosomes protein 1A	SMC1A	19.1481	19.3924	19.2573	19.3612	19.577	18.6376	13.3229	17.4455	18.4602	16.1269
+	2.93725	4.94664	Q9UQE7	Structural maintenance of chromosomes protein 3	SMC3	18.7934	19.3119	19.1202	18.9341	19.026	17.8398	11.8423	14.8817	16.8975	11.9423
+	3.80351	3.93045	Q9NTJ3	Structural maintenance of chromosomes protein 4	SMC4	13.7597	14.1106	12.6282	15.6059	14.9432	14.9391	10.4505	10.3052	11.1328	9.71425
+	2.78008	3.54606	Q8IY18	Structural maintenance of chromosomes protein 5	SMC5	14.947	11.9203	14.6903	14.8324	15.2877	13.3149	9.19398	11.3152	10.8082	11.1601
+	5.95479	4.20884	Q96SB8	Structural maintenance of chromosomes protein 6	SMC6	14.9927	14.9508	14.1859	15.2771	15.0805	14.1628	10.2852	10.7872	11.1932	9.9989
+	1.69728	3.32904	A6NHR9	Structural maintenance of chromosomes flexible hinge domain-containing protein 1	SMCHD1	19.2522	19.1436	19.4922	18.8373	18.9327	18.103	11.6343	17.7518	17.575	15.5634
+	3.74146	3.85523	P52788	Spermine synthase	SMS	14.8391	14.7119	14.3852	14.8897	15.1989	14.8272	10.5364	10.4494	13.0695	9.75839
+	3.34507	3.85098	O75643	U5 small nuclear ribonucleoprotein 200 kDa helicase	SNRNP200	18.6387	18.117	17.9578	18.3605	19.1368	18.019	13.6111	13.6782	16.923	13.8704
+	1.82754	1.59984	Q96DI7	U5 small nuclear ribonucleoprotein 40 kDa protein	SNRNP40	13.1734	13.421	10.8445	13.1512	13.2066	12.3918	11.3377	11.484	10.8088	10.7625
+	2.0053	2.5369	P08621	U1 small nuclear ribonucleoprotein 70 kDa	SNRNP70	14.1052	14.383	11.6883	13.2272	13.3214	12.862	10.642	10.0796	12.7703	9.41855
+	2.11182	1.63062	P62306	Small nuclear ribonucleoprotein F	SNRPF	12.8744	11.7461	13.0552	13.3529	12.9996	12.6564	9.97771	12.1977	11.4017	11.0236
+	3.08036	2.98765	Q13573	SNW domain-containing protein 1	SNW1	14.3391	14.2742	14.4322	14.0649	14.4511	13.9488	9.85561	10.2137	12.6384	12.3486
+	2.62246	1.10276	P37108	Signal recognition particle 14 kDa protein	SRP14	17.9097	17.8185	17.9174	18.0334	17.6464	17.1848	16.2911	16.5187	17.3883	16.3977
+	2.06777	3.15885	Q9BXP5	Serrate RNA effector molecule homolog	SRRT	15.979	15.3642	15.7909	16.1966	16.4714	14.7569	9.62386	13.5193	14.6933	12.5675
+	1.77305	2.53705	P05455	Lupus La protein	SSB	16.1564	15.7959	15.4097	16.2209	16.1757	14.8854	10.3113	13.6765	14.9186	14.0414
+	4.53656	5.46483	Q08945	FACT complex subunit SSRP1	SSRP1	19.8119	19.3888	19.5622	19.7365	20.107	18.9985	12.1713	15.0447	15.6726	13.6553
+	2.24445	3.82734	Q8N3U4	Cohesin subunit SA-2	STAG2	17.0232	16.7512	16.6762	16.4328	17.0942	14.6244	11.2874	10.9955	15.9754	12.167
+	3.01805	1.81051	P40763	Signal transducer and activator of transcription 3	STAT3	13.3953	12.9422	13.2264	14.0992	13.8781	12.5426	10.9945	11.4095	12.2134	11.5297
+	3.03264	2.02628	P53999	Activated RNA polymerase II transcriptional coactivator p15	SUB1	13.8068	13.8533	14.1439	13.618	14.7491	14.497	11.2342	11.8214	12.0703	13.2144
+	3.42203	3.61304	Q9Y5B9	FACT complex subunit SPT16	SUPT16H	20.2255	20.375	20.0726	20.3619	20.6713	19.3957	16.2461	16.2829	18.6062	15.1473
+	1.6507	2.36617	Q92797	Symplekin	SYMPK	14.8303	10.9266	13.2372	13.5608	14.0847	11.1922	11.2737	10.0739	10.1636	10.9121
+	2.43968	1.69964	P37802	Transgelin-2	TAGLN2	17.207	16.9156	16.8315	17.2669	17.3101	17.286	15.0337	15.362	16.8724	14.4779
+	2.02898	2.93705	Q13148	TAR DNA-binding protein 43	TARDBP	16.1137	15.622	15.5849	15.7626	16.1094	15.2848	10.9536	10.9786	14.9792	14.3253
+	2.5821	3.34345	O14776	Transcription elongation regulator 1	TCERG1	16.4288	16.3787	16.2566	16.4898	17.0937	15.6749	10.3482	14.0636	14.5392	13.2235
+	1.96589	1.91684	P17987	T-complex protein 1 subunit alpha	TCP1	18.1145	17.5704	17.8192	18.3051	18.2034	17.1551	15.9871	14.851	17.8401	15.0995
+	1.82711	3.10247	Q8NI27	THO complex subunit 2	THOC2	14.6362	14.6582	14.6851	14.7123	14.4138	9.93731	9.9515	10.878	10.7703	11.3523
+	6.34748	4.69554	Q9UNS1	Protein timeless homolog	TIMELESS	16.2401	16.1032	16.1228	16.3706	17.1357	15.5039	11.3531	11.0869	11.667	12.0951
+	4.28016	3.77523	P04183	Thymidine kinase, cytosolic	TK1	14.6823	14.3289	14.249	14.1302	14.252	13.9947	9.24965	11.7241	11.2728	9.74402
+	2.01828	1.67539	P29401	Transketolase	TKT	20.6307	20.1774	20.4723	20.9818	20.9792	19.983	18.6696	18.4638	20.4791	17.8355
+	3.14458	3.31647	P11388	DNA topoisomerase 2-alpha	TOP2A	19.9603	19.5683	19.5513	19.3198	19.699	18.6996	14.114	17.0328	17.4214	16.0314
+	3.38867	4.83932	Q02880	DNA topoisomerase 2-beta	TOP2B	16.1451	16.4586	16.3578	15.7864	15.8623	15.41	9.46887	11.2606	14.0211	9.90575
+	2.83777	-4.08587	Q12888	Tumor suppressor p53-binding protein 1	TP53BP1	10.204	11.7548	10.5484	9.8123	10.7708	12.0044	15.7389	12.142	15.7518	16.1072
+	1.80478	2.96862	Q9ULW0	Targeting protein for Xklp2	TPX2	16.9659	16.0872	16.5186	16.7725	16.978	15.5973	10.269	14.0013	15.9005	13.901
+	1.82199	2.20322	Q13263	Transcription intermediary factor 1-beta	TRIM28	20.2151	20.2807	20.3583	20.6508	20.6694	19.9321	15.7067	19.0012	19.7998	18.0837
+	5.80944	4.75875	Q9UPN9	E3 ubiquitin-protein ligase TRIM33	TRIM33	15.5253	15.3357	15.7291	15.5398	15.4791	14.5463	10.7134	10.4034	11.6033	9.68182
+	2.73462	1.86115	Q9NXH9	tRNA (guanine(26)-N(2))-dimethyltransferase	TRMT1	16.1273	16.2913	15.5783	15.9449	16.0297	15.7457	12.7771	13.9257	14.8953	14.7687
+	2.28768	2.72515	Q96Q11	CCA tRNA nucleotidyltransferase 1, mitochondrial	TRNT1	14.5361	13.8437	14.0189	10.8951	14.2818	14.2755	10.9677	11.1925	11.1704	10.3362
+	1.97774	1.88697	Q2NL82	Pre-rRNA-processing protein TSR1 homolog	TSR1	13.8146	13.8073	13.5389	13.7385	13.7007	13.2905	10.0911	11.1241	12.6542	13.1763
+	2.21748	1.47816	P0DN76;Q01081	Splicing factor U2AF 35 kDa subunit	U2AF1	13.7619	13.5498	12.7106	13.1714	13.4103	13.8556	11.6141	11.6388	13.1875	11.2867
+	2.28093	3.41148	P26368	Splicing factor U2AF 65 kDa subunit	U2AF2	17.0993	16.644	16.4832	16.2135	17.1453	16.0862	10.9996	12.0068	16.0091	13.7863
+	2.00609	3.10496	O15042	U2 snRNP-associated SURP motif-containing protein	U2SURP	14.6446	13.5475	13.8905	14.0642	16.0644	11.0816	9.31238	11.0736	11.586	11.1368
+	2.88679	2.00449	P22314	Ubiquitin-like modifier-activating enzyme 1	UBA1	20.4834	20.0763	20.1122	20.3606	20.6291	19.7087	17.3671	17.9678	19.5966	17.9641
+	2.42093	3.0439	Q9UBT2	SUMO-activating enzyme subunit 2	UBA2	14.2102	13.7956	13.7741	14.3547	13.4298	10.5625	10.4118	10.172	11.0453	9.61331
+	2.43959	2.89077	P63279	SUMO-conjugating enzyme UBC9	UBE2I	14.7768	14.6111	14.7662	14.9223	13.619	12.6761	9.46538	11.1227	12.4266	12.3366
+	2.02218	2.7158	O94888	UBX domain-containing protein 7	UBXN7	14.8071	10.6583	14.5037	13.2816	13.7275	14.2241	10.2952	10.5393	11.5677	10.8694
+	2.45063	3.13214	O60701	UDP-glucose 6-dehydrogenase	UGDH	15.2296	14.8779	14.9973	14.8324	14.518	14.8525	10.206	11.9058	14.4073	10.4907
+	4.59843	5.7822	Q96T88	E3 ubiquitin-protein ligase UHRF1	UHRF1	17.6296	17.3483	17.5987	17.5063	17.842	17.2426	10.6646	10.6605	14.1887	11.4689
+	1.67048	2.81353	Q53GS9	U4/U6.U5 tri-snRNP-associated protein 2	USP39	14.9067	14.9435	10.5086	14.0028	14.518	14.0393	9.73673	12.7042	10.5696	11.0147
+	2.89989	2.65953	P45974	Ubiquitin carboxyl-terminal hydrolase 5	USP5	14.7153	14.827	14.6807	15.0009	14.5247	14.7527	11.6737	11.5056	14.1101	11.0734
+	2.43374	3.32399	Q93009	Ubiquitin carboxyl-terminal hydrolase 7	USP7	16.1185	14.545	12.5833	16.029	15.8101	15.1446	10.8716	11.7581	10.9149	13.313
+	5.5969	7.1366	O75717	WD repeat and HMG-box DNA-binding protein 1	WDHD1	18.1029	17.7447	17.7657	19.2926	19.4552	18.2856	11.7	11.2165	12.5735	9.72806
+	2.61679	1.96878	Q8NI36	WD repeat-containing protein 36	WDR36	14.0736	12.9517	12.8103	11.7267	13.2154	12.1181	10.8123	10.8862	11.3356	10.3548
+	5.42386	7.70246	O95785	Protein Wiz	WIZ	18.809	18.9955	18.9057	19.9309	19.7244	18.0025	11.5654	11.4208	13.0529	9.39626
+	4.44234	3.71789	Q96S55	ATPase WRNIP1	WRNIP1	15.0561	14.3231	14.7324	15.3767	15.3245	13.8625	12.2407	10.8703	10.2231	10.9112
+	2.17429	1.98477	Q9HCS7	Pre-mRNA-splicing factor SYF1	XAB2	12.9042	11.2455	12.9264	13.7365	13.5854	11.4893	10.3945	10.8929	10.9073	10.4577
+	1.66596	3.28674	O14980	Exportin-1	XPO1	18.1213	18.2724	17.8553	18.0815	17.8454	16.9434	11.0545	14.7404	18.042	14.4289
+	3.61922	5.2139	Q9HAV4	Exportin-5	XPO5	17.4431	17.2954	16.5668	17.3187	17.2564	16.7697	9.48392	12.1747	14.4588	11.4605
+	2.53985	2.84435	O43592	Exportin-T	XPOT	15.7727	15.4206	15.0339	14.3449	14.7118	14.6013	12.5594	11.1176	14.1451	10.7241
+	2.73261	2.04021	P13010	X-ray repair cross-complementing protein 5	XRCC5	20.023	19.7355	19.6114	20.3515	20.3006	19.4361	17.2265	17.6546	19.3736	17.2233
+	3.07137	2.61686	P12956	X-ray repair cross-complementing protein 6	XRCC6	20.7819	20.463	20.3472	20.4398	20.7089	19.6615	17.6476	17.4009	19.4242	16.6615
+	3.73708	2.6343	P31946	14-3-3 protein beta/alpha;14-3-3 protein beta/alpha, N-terminally processed	YWHAB	13.9061	13.3562	13.6222	13.7054	14.0721	13.7075	9.76995	10.9999	11.9785	11.6275
+	2.14061	2.06802	P63104	14-3-3 protein zeta/delta	YWHAZ	15.7956	15.698	15.9004	15.7283	15.967	15.5686	15.3461	14.44	12.1403	12.9069
+	3.61688	3.49573	P25490;Q96MM3	Transcriptional repressor protein YY1;Zinc finger protein 42 homolog	YY1;ZFP42	14.4416	14.9887	14.2961	14.6271	14.8481	14.5412	10.2246	10.58	10.5356	13.1721
+	1.66386	2.192	Q5VZL5	Zinc finger MYM-type protein 4	ZMYM4	13.1345	11.5783	13.5994	14.4575	13.5236	10.6237	9.83545	10.658	10.6616	11.3549
+	2.9596	3.11479	P17028	Zinc finger protein 24	ZNF24	13.7063	13.7401	13.7558	14.103	13.7455	12.1717	8.58527	11.4108	11.3433	10.3497
+	1.81852	2.20612	Q9UEG4	Zinc finger protein 629	ZNF629	13.4061	13.6278	13.7128	13.8488	13.6449	11.6299	9.4736	13.021	10.9661	10.9616
+	6.22984	5.1926	Q9H582	Zinc finger protein 644	ZNF644	16.6527	16.6484	16.7547	16.3753	16.2682	15.7846	10.1382	11.1599	12.004	11.5833
+	1.66524	2.71808	Q8TF20	Zinc finger protein 721	ZNF721	14.6366	14.3102	13.3309	13.8794	14.4384	10.6264	8.87822	10.9711	11.0518	12.3744
	0.113082	-0.205309	Q9NRG9	Aladin	AAAS	11.1091	10.9002	11.2101	10.0203	9.88741	11.5351	10.2829	10.5686	13.1782	9.89973
	0.0359217	-0.0745376	P49588	Alanine--tRNA ligase, cytoplasmic	AARS	12.3329	10.9861	11.3135	10.6925	9.84624	12.0399	9.92116	10.2402	12.1743	12.7698
	0.120878	-0.466772	Q5JTZ9	Alanine--tRNA ligase, mitochondrial	AARS2	16.3047	15.9346	15.4291	12.0407	14.4719	17.6758	16.8271	16.9482	11.7085	17.6211
	1.55566	-0.905196	Q9NRN7	L-aminoadipate-semialdehyde dehydrogenase-phosphopantetheinyl transferase	AASDHPPT	10.4868	11.0532	9.45075	10.9387	10.7606	10.8091	12.0369	11.2235	11.5103	11.1829
	0.12999	-0.191483	Q9NRK6	ATP-binding cassette sub-family B member 10, mitochondrial	ABCB10	11.1127	11.6108	11.4709	11.0621	9.19578	10.4141	11.1851	9.82897	11.7525	11.2436
	0.271828	-0.544582	O75027	ATP-binding cassette sub-family B member 7, mitochondrial	ABCB7	14.8623	15.369	15.2574	11.3796	15.071	15.6956	15.549	15.4769	14.5407	15.035
	0.119759	0.227052	Q8NE71	ATP-binding cassette sub-family F member 1	ABCF1	11.6408	12.9101	10.2939	12.2942	10.9765	11.3511	9.92532	13.112	11.5539	10.8116
	0.394764	-0.499307	Q9NUJ1	Mycophenolic acid acyl-glucuronide esterase, mitochondrial	ABHD10	12.3923	10.923	11.1649	10.0348	10.9964	10.4037	12.6622	10.2639	11.4741	11.5404
	0.108195	0.320585	Q8NFV4	Alpha/beta hydrolase domain-containing protein 11	ABHD11	13.2473	14.1541	13.9965	13.0752	8.89446	12.8492	13.6204	11.8135	10.8841	13.2107
	1.1273	1.36915	Q96IU4	Alpha/beta hydrolase domain-containing protein 14B	ABHD14B	12.2752	12.5943	10.3645	12.5139	12.593	11.4908	8.96582	10.8734	11.9605	10.6114
	0.0490163	0.0506911	P42765	3-ketoacyl-CoA thiolase, mitochondrial	ACAA2	19.035	19.1121	18.9259	18.4745	18.8107	20.0685	19.4933	19.191	18.12	19.2774
	1.28601	-1.05626	Q13085	Acetyl-CoA carboxylase 1;Biotin carboxylase	ACACA	23.6143	23.7525	23.4923	22.8908	22.587	24.2881	24.2541	25.2679	23.3815	25.0715
	0.643009	-1.35008	O00763	Acetyl-CoA carboxylase 2;Biotin carboxylase	ACACB	12.5021	13.0925	10.1516	11.3918	9.78734	12.6268	13.381	14.7939	10.2611	13.3325
	0.249849	0.46686	Q6JQN1	Acyl-CoA dehydrogenase family member 10	ACAD10	10.5917	11.1572	11.5091	13.5915	11.3296	13.6209	12.9258	10.6792	11.0539	11.3404
	0.0478707	-0.0586416	Q9H845	Acyl-CoA dehydrogenase family member 9, mitochondrial	ACAD9	15.9433	16.046	15.6532	14.8866	15.2547	16.1769	17.0334	15.1228	15.346	15.3729
	0.157831	-0.254856	P11310	Medium-chain specific acyl-CoA dehydrogenase, mitochondrial	ACADM	16.0628	14.5613	15.0361	15.0647	15.486	17.3029	16.8494	15.7461	14.5749	16.1916
	0.381619	0.528248	P16219	Short-chain specific acyl-CoA dehydrogenase, mitochondrial	ACADS	12.3085	12.4597	11.7715	9.98907	10.1246	12.2462	11.3085	11.1001	10.1527	11.2588
	0.41751	-0.248072	P49748	Very long-chain specific acyl-CoA dehydrogenase, mitochondrial	ACADVL	19.2432	18.857	18.9689	18.6171	18.5976	19.8978	19.5985	19.2324	18.9812	19.3012
	0.369989	0.231758	P24752	Acetyl-CoA acetyltransferase, mitochondrial	ACAT1	19.0887	19.123	19.1098	18.5954	18.9141	20.0639	19.1926	18.7684	18.5718	19.1368
	1.03635	1.44621	Q9BWD1	Acetyl-CoA acetyltransferase, cytosolic	ACAT2	14.0899	10.6077	13.1399	11.2437	13.981	13.4319	11.5264	11.1464	11.4926	11.0459
	0.214234	-0.288422	Q99798	Aconitate hydratase, mitochondrial	ACO2	15.9084	15.5482	15.695	14.2661	15.6161	16.6531	16.8763	15.5789	14.7321	16.4244
	0.40403	0.586279	Q86TX2;P49753	Acyl-coenzyme A thioesterase 1;Acyl-coenzyme A thioesterase 2, mitochondrial	ACOT1;ACOT2	11.2711	10.0341	12.0922	12.0655	11.0333	12.6029	11.5699	11.7583	11.1109	9.28198
	0.508178	1.20231	Q9NPJ3	Acyl-coenzyme A thioesterase 13;Acyl-coenzyme A thioesterase 13, N-terminally processed	ACOT13	14.072	13.2813	13.6564	13.3923	13.4106	9.84983	10.2393	10.2718	12.0147	14.44
	0.722251	0.932009	O00154	Cytosolic acyl coenzyme A thioester hydrolase	ACOT7	12.4609	11.0859	12.8128	9.62655	12.5834	11.2259	10.2464	10.7752	11.3137	10.467
	0.358377	-0.41383	Q9Y305	Acyl-coenzyme A thioesterase 9, mitochondrial	ACOT9	15.7853	15.3125	15.4486	14.8697	15.1099	16.8076	16.762	16.1098	14.6382	16.3678
	0.527885	1.0658	P24666	Low molecular weight phosphotyrosine protein phosphatase	ACP1	14.7272	14.8545	14.8228	14.9391	14.7554	14.4229	15.0309	14.3985	10.1199	15.2021
	0.140232	-0.150343	Q96CM8	Acyl-CoA synthetase family member 2, mitochondrial	ACSF2	16.8455	16.2519	16.7014	15.738	16.0921	17.0032	16.9606	16.9126	15.358	17.1248
	0.0434832	0.0846721	Q4G176	Acyl-CoA synthetase family member 3, mitochondrial	ACSF3	15.4186	14.5678	15.249	14.5215	15.1669	17.4651	16.349	14.7076	14.1819	16.0154
	0.0590542	-0.0972596	O60488	Long-chain-fatty-acid--CoA ligase 4	ACSL4	10.7917	11.5521	10.5911	11.0787	10.9304	11.5459	9.98091	13.1659	10.4899	11.079
	0.529381	0.744672	Q9NR19	Acetyl-coenzyme A synthetase, cytoplasmic	ACSS2	11.0088	10.3908	11.1547	10.732	13.4214	12.8522	10.816	10.6221	11.5971	10.3594
	1.65569	-1.8487	P68133;P68032;P63267;P62736	Actin, alpha skeletal muscle;Actin, alpha cardiac muscle 1;Actin, gamma-enteric smooth muscle;Actin, aortic smooth muscle	ACTA1;ACTC1;ACTG2;ACTA2	12.2659	10.9782	13.3146	9.99819	11.7423	12.7556	14.0286	14.0304	12.9126	13.793
	0.520954	0.936998	P12814	Alpha-actinin-1	ACTN1	14.2293	13.0482	14.3119	10.869	13.0792	14.2257	14.038	12.7184	11.3368	11.3344
	0.129781	0.221993	Q9C0K3;Q9P1U1;P61158	Actin-related protein 3C;Actin-related protein 3B;Actin-related protein 3	ACTR3C;ACTR3B;ACTR3	12.1051	10.0673	11.5345	10.8655	9.19857	12.0078	10.8121	11.3746	11.0299	9.74786
	0.295243	0.881706	Q8NI60	Atypical kinase ADCK3, mitochondrial	ADCK3	13.5013	13.3292	13.5341	9.86781	10.3185	14.7641	14.5212	10.7115	11.2289	10.2216
	0.582687	0.594843	Q96D53	AarF domain-containing protein kinase 4	ADCK4	10.6812	10.8262	10.912	10.2242	10.6616	12.4631	10.4428	11.2813	10.278	9.46406
	0.18717	0.574832	O95622	Adenylate cyclase type 5	ADCY5	15.5814	16.0047	15.78	14.3917	13.6168	10.695	14.7832	11.3466	14.9475	14.0033
	1.10533	2.4337	Q9H2P0	Activity-dependent neuroprotector homeobox protein	ADNP	16.6547	16.8989	16.9692	16.3862	15.8331	13.2643	10.3874	15.8446	15.1187	12.9187
	0.396965	-0.349365	Q16186	Proteasomal ubiquitin receptor ADRM1	ADRM1	9.98167	11.5365	11.1912	11.2963	9.87788	11.0762	11.4924	10.6413	11.416	11.1542
	0.693546	0.807609	P30566	Adenylosuccinate lyase	ADSL	13.3896	10.9295	11.8898	11.3549	11.5059	11.0522	11.5097	11.1475	11.315	9.54535
	0.535037	-0.493398	P30520	Adenylosuccinate synthetase isozyme 2	ADSS	10.0771	10.8503	11.0365	11.3698	10.2548	11.0166	10.3704	12.4436	10.8061	11.4236
	0.71034	-1.35957	Q9Y4W6	AFG3-like protein 2	AFG3L2	14.9204	13.6805	14.458	10.4969	14.0494	15.3685	16.2731	14.4689	14.359	15.653
	0.980313	-1.59394	Q9BSE5	Agmatinase, mitochondrial	AGMAT	13.0856	12.501	10.6621	11.2071	13.6733	15.1641	15.0222	14.312	13.6245	14.2792
	0.0886619	0.286829	Q8WYP5	Protein ELYS	AHCTF1	13.648	11.5172	13.3365	11.0649	13.4218	10.9775	9.43682	10.3779	14.6383	13.7103
	1.74413	1.32143	P23526	Adenosylhomocysteinase	AHCY	16.7746	17.0377	16.6096	17.0395	17.0072	16.3418	13.946	15.566	16.2264	16.1827
	0.804329	-0.551157	O43865;Q96HN2	Putative adenosylhomocysteinase 2;Putative adenosylhomocysteinase 3	AHCYL1;AHCYL2	9.99719	11.2975	11.0825	11.5293	10.545	11.3516	11.6057	12.0381	10.8806	11.5489
	0.158085	-0.382082	Q09666	Neuroblast differentiation-associated protein AHNAK	AHNAK	15.1187	12.5376	15.5037	14.6714	14.9545	16.4612	16.553	12.8605	15.3388	16.274
	0.51414	1.11628	O95433	Activator of 90 kDa heat shock protein ATPase homolog 1	AHSA1	14.2154	12.8081	10.7793	11.0236	14.074	11.4361	10.1631	13.7344	10.3743	10.8208
	0.159852	-0.476649	O95831	Apoptosis-inducing factor 1, mitochondrial	AIFM1	13.4165	13.527	12.9319	12.0305	9.33184	14.7268	14.7054	12.7663	10.8951	14.1829
	0.401393	-0.522498	Q13155	Aminoacyl tRNA synthase complex-interacting multifunctional protein 2	AIMP2	12.1724	11.6164	9.9433	11.1044	9.46788	11.2341	11.1475	10.6684	12.0873	11.8791
	0.623824	0.783232	O00170	AH receptor-interacting protein	AIP	12.5329	10.9484	11.3818	11.5351	12.8395	11.4596	10.2111	9.83162	11.4155	12.5404
	1.07912	1.03141	P54819	Adenylate kinase 2, mitochondrial;Adenylate kinase 2, mitochondrial, N-terminally processed	AK2	12.555	12.3336	11.8057	11.8364	11.6464	13.8802	10.7821	11.2101	10.8225	12.4313
	0.0626357	0.18469	Q9UIJ7	GTP:AMP phosphotransferase AK3, mitochondrial	AK3	10.5983	12.1378	12.7824	10.3525	10.1418	13.737	14.0791	10.6744	11.2884	9.71931
	0.384387	-1.15939	P27144	Adenylate kinase 4, mitochondrial	AK4	9.95466	10.9191	13.5018	13.052	10.4293	14.8609	15.23	10.0309	13.721	14.1341
	1.10904	1.99184	P15121	Aldose reductase	AKR1B1	15.895	15.7557	15.2999	16.5705	16.2246	15.4884	15.1329	10.271	15.335	14.7832
	1.66424	0.841482	P42330	Aldo-keto reductase family 1 member C3	AKR1C3	16.6161	16.9295	16.6573	17.2016	16.6813	16.1412	15.6568	16.0037	16.5995	15.1921
	1.40519	1.87065	P51857	3-oxo-5-beta-steroid 4-dehydrogenase	AKR1D1	15.0764	15.305	15.319	15.5359	15.4848	14.4957	13.499	14.3131	14.8471	10.6695
	0.988281	-0.662652	P54886	Delta-1-pyrroline-5-carboxylate synthase;Glutamate 5-kinase;Gamma-glutamyl phosphate reductase	ALDH18A1	18.3753	18.9756	18.6028	18.1404	17.572	19.4945	19.3153	19.2966	18.7544	19.3915
	0.51029	-1.49026	P30837	Aldehyde dehydrogenase X, mitochondrial	ALDH1B1	15.0797	14.2244	10.6897	11.7054	15.0587	16.6317	16.7871	15.789	12.6249	16.353
	0.0421798	-0.119318	P51649	Succinate-semialdehyde dehydrogenase, mitochondrial	ALDH5A1	10.24	11.0772	13.2352	13.6175	10.878	13.3633	13.4085	10.5203	13.7214	11.1013
	0.0816108	0.19634	Q02252	Methylmalonate-semialdehyde dehydrogenase [acylating], mitochondrial	ALDH6A1	15.8391	15.2832	14.8767	14.0631	14.8336	17.1341	16.6261	12.7212	15.0055	16.215
	0.467742	-1.22161	P49419	Alpha-aminoadipic semialdehyde dehydrogenase	ALDH7A1	15.344	9.88835	15.5466	15.1644	15.1267	15.9945	16.3539	15.9991	14.6115	15.9648
	0.124035	0.273707	P49189	4-trimethylaminobutyraldehyde dehydrogenase	ALDH9A1	12.8574	12.931	13.2004	13.1428	13.416	13.7374	14.849	10.0011	13.2906	13.6213
	3.01284	0.468247	P04075	Fructose-bisphosphate aldolase A	ALDOA	19.1503	19.2502	19.3053	19.256	19.344	19.0694	18.9139	18.5366	18.9307	18.6627
	1.2257	1.91271	P09972	Fructose-bisphosphate aldolase C	ALDOC	15.4981	15.1121	14.9461	15.5555	15.6972	15.4973	14.6931	14.6	10.2188	14.3748
	0.496652	0.859805	Q92685	Dol-P-Man:Man(5)GlcNAc(2)-PP-Dol alpha-1,3-mannosyltransferase	ALG3	11.767	13.5256	10.8558	10.3723	11.3241	10.0085	8.65675	10.6815	10.935	11.5231
	0.503694	0.638022	Q86V81	THO complex subunit 4	ALYREF	11.6083	10.9395	11.6621	11.2368	13.4035	10.1799	11.7195	10.5695	10.614	10.565
	0.389427	0.2439	Q9UJX3	Anaphase-promoting complex subunit 7	ANAPC7	11.4548	10.5701	10.6688	11.6357	10.6046	11.2896	10.6171	10.9227	11.2113	10.4223
	1.32081	3.38643	Q9BTT0	Acidic leucine-rich nuclear phosphoprotein 32 family member E	ANP32E	17.6042	17.2159	16.8106	17.0206	17.7296	16.4883	18.1137	11.3892	15.2862	10.2447
	0.983782	1.23834	P50995	Annexin A11	ANXA11	13.208	11.151	12.9943	13.2618	13.5915	13.7969	12.5938	10.4124	11.1329	12.9098
	0.40768	-0.239488	P07355;A6NMY6	Annexin A2;Putative annexin A2-like protein	ANXA2;ANXA2P2	18.9591	18.8964	18.8586	17.912	18.4893	19.1353	19.2062	19.0804	18.441	19.0641
	0.939862	1.06463	P12429	Annexin A3	ANXA3	12.0051	12.4811	12.5409	13.4696	12.7243	12.9437	13.1843	10.1511	12.346	10.8365
	1.28494	2.0614	P08758	Annexin A5	ANXA5	15.0771	12.078	14.6741	14.1577	14.9868	15.5262	13.4624	13.6341	12.2487	10.0758
	0.486251	1.03641	P20073	Annexin A7	ANXA7	15.3841	13.9702	11.3653	14.6251	13.1747	13.9728	10.216	12.8594	14.2791	13.4946
	1.00103	0.791905	O95782;O94973	AP-2 complex subunit alpha-1;AP-2 complex subunit alpha-2	AP2A1;AP2A2	11.9303	11.6496	12.2844	11.1972	10.0016	11.1451	10.3794	10.248	10.7646	10.9126
	1.6075	0.599745	P63010;Q10567	AP-2 complex subunit beta;AP-1 complex subunit beta-1	AP2B1;AP1B1	11.5774	10.9853	10.8354	10.97	10.8745	11.2849	10.5375	9.90478	10.8233	10.6871
	0.112766	-0.140513	Q9UBZ4	DNA-(apurinic or apyrimidinic site) lyase 2	APEX2	10.5119	10.8376	12.2845	10.7383	10.3413	10.4462	10.8069	11.8622	11.2066	10.1263
	0.947676	1.19658	Q8NCW5	NAD(P)H-hydrate epimerase	APOA1BP	13.0958	10.8876	13.0355	13.0173	10.1689	12.4865	10.2541	11.0518	11.2628	11.1061
	0.609422	-1.54751	P02656	Apolipoprotein C-III	APOC3	10.7085	11.3937	13.1762	13.739	11.5325	14.5338	14.8979	15.6942	10.439	15.2149
	0.117297	0.336624	Q8IVJ8	AP20 region protein 1	APRG1	10.6467	12.0732	15.0125	11.2607	8.9672	10.341	11.2421	11.8638	10.717	10.3649
	0.0967069	0.0662657	P07741	Adenine phosphoribosyltransferase	APRT	10.668	11.2757	10.2824	10.7679	10.823	11.3147	10.4151	10.9523	11.272	10.5166
	1.08752	1.64694	O60306	Intron-binding protein aquarius	AQR	15.1273	14.1103	10.7457	13.7889	14.2752	13.7421	11.491	11.1352	12.7881	12.5243
	1.19591	-0.959287	P48444	Coatomer subunit delta	ARCN1	10.3954	10.745	11.7499	11.5331	9.9029	10.0318	11.4365	11.1265	12.3627	11.8169
	1.22505	1.54663	P61204;P84077;P84085	ADP-ribosylation factor 3;ADP-ribosylation factor 1;ADP-ribosylation factor 5	ARF3;ARF1;ARF5	14.4384	12.3256	14.3796	13.9206	14.2436	14.3117	13.2097	11.4824	13.9773	10.8905
	0.806141	0.393395	P18085	ADP-ribosylation factor 4	ARF4	14.4557	13.695	14.4942	14.1523	13.8652	13.9652	13.2627	13.4499	13.7742	14.358
	1.36966	-2.60235	P05089	Arginase-1	ARG1	10.0321	11.026	13.9116	10.2043	10.4079	10.6058	13.2696	16.1259	11.2886	13.8504
	0.0082633	0.0146639	Q8N8R7	ARL14 effector protein	ARL14EP	10.2982	10.845	12.8776	10.3244	10.325	10.123	10.7712	10.1158	11.7538	10.4961
	0.35034	0.649963	P36404	ADP-ribosylation factor-like protein 2	ARL2	12.0938	10.9903	13.5509	9.51108	12.2929	10.7521	9.58069	11.3131	10.8521	11.7817
	0.292081	0.40416	O15145	Actin-related protein 2/3 complex subunit 3	ARPC3	10.7612	10.7224	12.5009	11.4089	12.5601	10.6438	10.4101	12.1037	10.1017	11.4994
	0.375535	0.557175	P59998	Actin-related protein 2/3 complex subunit 4	ARPC4	10.6088	10.8536	12.1731	11.4239	12.0382	12.8078	9.30965	11.8928	12.0613	11.1111
	0.421421	0.466797	Q9NVP2	Histone chaperone ASF1B	ASF1B	11.0236	11.822	10.8887	10.9001	11.7392	11.1874	9.331	10.9487	12.1299	10.7639
	0.529758	0.813366	O43681	ATPase ASNA1	ASNA1	10.5879	11.0316	12.5236	9.62231	12.9237	12.6243	10.8778	10.3808	10.121	11.5759
	0.325883	-0.553408	P08243	Asparagine synthetase [glutamine-hydrolyzing]	ASNS	11.0131	12.064	8.9025	12.4549	10.9205	10.8409	11.6018	10.5839	11.3158	12.8427
	0.182698	0.181482	Q8IZT6	Abnormal spindle-like microcephaly-associated protein	ASPM	11.1355	10.4876	11.4661	11.4667	11.1029	10.5035	10.2439	11.2482	11.7977	10.0924
	1.27647	2.21563	Q6PL18	ATPase family AAA domain-containing protein 2	ATAD2	16.4744	16.4808	16.4506	14.0397	15.0527	15.1723	12.5425	14.5381	15.6015	10.9024
	0.950899	-0.811455	Q9NVI7	ATPase family AAA domain-containing protein 3A	ATAD3A	17.3414	17.4181	17.4759	16.413	17.1894	18.4268	18.464	18.5044	17.0173	18.7699
	0.859879	-1.64854	Q5T9A4	ATPase family AAA domain-containing protein 3B	ATAD3B	9.23781	10.4483	10.8435	11.8431	10.4128	13.2308	13.1598	13.4873	9.99184	13.9661
	0.278914	0.495114	P18846;P16220	Cyclic AMP-dependent transcription factor ATF-1;Cyclic AMP-responsive element-binding protein 1	ATF1;CREB1	12.2233	10.882	9.64572	12.898	12.8164	10.9184	11.6251	9.77249	11.2073	11.6706
	0.221225	0.391202	P31939	Bifunctional purine biosynthesis protein PURH;Phosphoribosylaminoimidazolecarboxamide formyltransferase;IMP cyclohydrolase	ATIC	13.0161	10.592	9.5184	12.7752	11.5717	10.4164	11.2535	11.083	10.717	10.6415
	0.405502	0.56398	Q13315	Serine-protein kinase ATM	ATM	12.7053	12.4184	10.3772	11.979	10.4996	10.3935	10.6601	11.8653	10.6007	10.1999
	0.0130631	0.0341874	P16615	Sarcoplasmic/endoplasmic reticulum calcium ATPase 2	ATP2A2	12.6097	10.2221	12.5933	11.4882	13.4578	9.7466	11.8143	13.2883	11.069	10.4367
	1.2678	-0.659075	P25705	ATP synthase subunit alpha, mitochondrial	ATP5A1	20.7677	20.4844	20.7539	20.4271	20.6603	21.8131	21.8907	21.3861	21.0706	21.5598
	0.791527	-0.582575	P06576	ATP synthase subunit beta, mitochondrial	ATP5B	20.0201	19.7151	20.0731	19.2054	19.6839	20.9116	21.0113	20.5347	19.653	20.8708
	0.257693	0.743703	P36542	ATP synthase subunit gamma, mitochondrial	ATP5C1	16.1943	15.6728	15.3738	15.1246	16.402	16.2782	16.3727	16.6913	10.667	16.658
	0.225049	-0.332502	P24539	ATP synthase F(0) complex subunit B1, mitochondrial	ATP5F1	15.8912	14.7567	14.9811	13.5581	15.407	16.3069	16.1748	15.6048	14.2232	15.9279
	0.357153	-0.949753	O75947	ATP synthase subunit d, mitochondrial	ATP5H	12.8097	14.1476	10.2991	12.2714	11.9439	15.275	15.3824	14.5761	11.0037	14.0013
	0.267796	-0.668034	P56134	ATP synthase subunit f, mitochondrial	ATP5J2	15.4449	10.4646	15.5375	14.9834	14.8855	14.9799	14.7215	14.2221	16.1947	15.0644
	0.194256	-0.179742	O75964	ATP synthase subunit g, mitochondrial	ATP5L	14.7	13.5017	14.2362	13.9153	14.1891	15.2219	14.6453	14.6198	13.722	14.9082
	0.492955	-0.397054	P48047	ATP synthase subunit O, mitochondrial	ATP5O	17.2503	17.2564	17.6025	16.4378	16.8193	18.0108	18.2568	17.6047	16.7834	17.8613
	0.679566	-0.898214	Q13535	Serine/threonine-protein kinase ATR	ATR	10.5299	10.2073	12.8142	10.1692	10.6426	10.5821	13.0842	11.9737	10.6545	11.1772
	0.0710932	-0.317073	Q8WWM7	Ataxin-2-like protein	ATXN2L	15.0765	15.4346	11.9122	15.5507	9.93023	10.5357	14.8744	10.7533	15.7968	12.1371
	0.90161	-0.480861	Q13825	Methylglutaconyl-CoA hydratase, mitochondrial	AUH	10.9424	11.0147	10.5353	11.3323	10.9659	9.87008	11.4636	11.5061	11.0371	11.0238
	0.665092	1.22919	Q96GD4	Aurora kinase B	AURKB	13.4424	13.6783	11.956	12.1951	11.0992	10.3806	11.313	10.2637	12.9035	9.10416
	0.050237	-0.114602	P25311	Zinc-alpha-2-glycoprotein	AZGP1	12.3151	11.1366	14.0999	10.2897	10.4742	10.1348	11.5279	11.2979	12.1736	11.0925
	0.811564	1.27225	O95816	BAG family molecular chaperone regulator 2	BAG2	13.1366	10.1676	12.7662	11.5817	10.3332	13.6739	9.81114	11.3532	11.1866	10.3327
	0.320299	0.596052	P46379	Large proline-rich protein BAG6	BAG6	10.4485	13.4218	13.588	13.2024	12.5164	10.0669	11.4946	11.8519	11.7845	11.3142
	1.4662	0.895467	O75531	Barrier-to-autointegration factor;Barrier-to-autointegration factor, N-terminally processed	BANF1	15.2104	14.7887	13.4587	14.7753	14.9102	14.6388	13.4119	14.2035	13.978	13.3461
	0.0806914	0.106055	Q07812	Apoptosis regulator BAX	BAX	9.42587	11.1928	11.5671	11.3942	9.7359	11.2097	10.3973	10.8948	10.5606	10.7402
	0.545363	1.05638	Q9NRL2	Bromodomain adjacent to zinc finger domain protein 1A	BAZ1A	10.0733	14.1922	10.6764	12.3264	12.0508	14.3355	10.8677	11.8196	10.6375	11.5527
	0.431859	0.696528	O75934	Pre-mRNA-splicing factor SPF27	BCAS2	10.5683	11.0434	11.3377	9.54868	13.2965	11.2512	9.24528	10.5992	11.5847	10.482
	0.522163	-0.820013	O15382	Branched-chain-amino-acid aminotransferase, mitochondrial	BCAT2	11.5662	9.3943	12.9895	11.4047	11.6882	12.4526	13.6587	11.8924	11.3767	12.6826
	1.00485	1.5652	Q9P287	BRCA2 and CDKN1A-interacting protein	BCCIP	13.4057	13.3361	13.7501	12.8832	10.2698	11.1238	12.0924	11.1347	9.51082	10.847
	0.356692	-0.613431	O14874	[3-methyl-2-oxobutanoate dehydrogenase [lipoamide]] kinase, mitochondrial	BCKDK	11.8384	11.15	9.8971	9.87224	10.4848	10.2934	12.2955	11.2521	12.3811	8.88221
	0.611359	0.653235	Q9NYF8	Bcl-2-associated transcription factor 1	BCLAF1	12.297	10.8912	11.6741	9.97735	12.4279	11.0504	10.7647	10.4236	11.4726	10.2714
	0.0206152	-0.0524495	Q9Y276	Mitochondrial chaperone BCS1	BCS1L	13.4745	11.7447	14.1272	12.6146	10.6959	14.3229	13.4481	11.249	12.7032	14.1293
	0.627179	0.380781	P55957	BH3-interacting domain death agonist;BH3-interacting domain death agonist p15;BH3-interacting domain death agonist p13;BH3-interacting domain death agonist p11	BID	10.8575	10.4762	10.4579	11.4476	11.1118	11.6133	10.9107	11.0303	10.2413	10.2708
	0.614921	-1.12373	Q13867	Bleomycin hydrolase	BLMH	12.4982	10.7616	11.3973	10.5799	11.7696	8.4701	11.1095	14.0147	11.1047	11.9171
	0.616985	0.801306	P53004	Biliverdin reductase A	BLVRA	10.8635	11.4086	10.1586	11.5495	12.2371	10.1964	9.05722	11.8659	10.4406	9.70682
	0.596487	0.672753	Q9H3K6	BolA-like protein 2	BOLA2	10.7682	11.3524	10.2803	12.3896	11.9224	11.9011	10.3889	10.2082	10.3044	12.1501
	1.35931	-1.49519	Q86WA6	Valacyclovir hydrolase	BPHL	11.1381	9.90243	10.1769	11.2764	11.155	9.86488	12.4312	11.1871	10.908	13.797
	0.187235	-0.244442	Q9NP55	BPI fold-containing family A member 1	BPIFA1	9.9803	11.2182	10.8635	11.8636	11.2947	10.5084	12.1712	10.4198	11.9451	10.2607
	0.24867	-0.290491	O95861	3(2),5-bisphosphate nucleotidase 1	BPNT1	10.1692	10.9034	10.853	10.019	9.57676	10.0441	9.60012	10.8177	11.8737	9.91402
	0.085956	-0.237139	Q12830	Nucleosome-remodeling factor subunit BPTF	BPTF	11.0823	11.3618	11.2813	11.2629	10.9383	10.7338	9.1931	15.018	10.7755	10.4022
	0.163633	0.380176	Q15059	Bromodomain-containing protein 3	BRD3	12.8623	10.4422	11.2135	13.8114	13.392	10.2004	10.4074	11.3883	13.0408	11.5906
	0.890539	0.964458	O60885	Bromodomain-containing protein 4	BRD4	13.2208	11.5545	13.1216	11.7782	13.324	10.8613	12.0764	11.1278	10.9481	11.2302
	0.354202	0.48811	Q9NXR7	BRCA1-A complex subunit BRE	BRE	12.9159	11.9054	11.0487	12.212	11.3125	9.8369	10.0545	11.3259	11.3595	11.4619
	1.08981	1.42367	Q8TDN6	Ribosome biogenesis protein BRX1 homolog	BRIX1	14.3663	13.7586	13.312	11.4677	12.771	13.1437	10.481	12.7435	10.7313	12.8958
	1.06839	0.752055	P20290	Transcription factor BTF3	BTF3	11.4797	11.8154	11.4273	11.2408	11.236	11.0319	10.7862	9.7607	11.8187	10.1137
	0.0312868	0.0580928	Q13895	Bystin	BYSL	12.1019	11.2751	11.5248	12.0729	9.79406	9.68543	10.8089	10.0889	12.125	11.0477
	0.207863	-0.134479	Q7L1Q6	Basic leucine zipper and W2 domain-containing protein 1	BZW1	15.6893	14.891	14.9329	14.9211	15.6829	15.8783	15.7955	15.1166	15.4804	15.4757
	1.19918	1.34554	Q9HB07	UPF0160 protein MYG1, mitochondrial	C12orf10	10.4372	13.113	12.9507	13.4851	12.8863	12.3299	11.0729	10.8846	12.2073	10.5878
	0.0263478	-0.0803631	Q07021	Complement component 1 Q subcomponent-binding protein, mitochondrial	C1QBP	15.8719	14.8708	13.6793	14.2633	14.8344	17.0505	16.6888	15.9765	11.9558	16.0804
	0.959611	-1.75433	Q8WWC4	Uncharacterized protein C2orf47, mitochondrial	C2orf47	12.7452	10.2721	10.2759	12.3455	13.9669	13.9457	14.4275	14.7663	12.2136	14.6441
	1.36546	1.0844	Q9BUH6	Protein PAXX	C9orf142	11.0527	11.7807	12.7889	11.7835	13.234	11.2268	11.0818	11.0724	10.8661	10.5531
	0.116043	0.183783	Q9HB71	Calcyclin-binding protein	CACYBP	14.1249	14.3501	13.9817	13.8988	11.5362	14.736	13.0797	13.7272	13.6764	13.8668
	0.522718	-1.44152	P27708	CAD protein;Glutamine-dependent carbamoyl-phosphate synthase;Aspartate carbamoyltransferase;Dihydroorotase	CAD	14.3927	10.9001	13.771	10.8871	10.2713	14.1215	13.3066	15.3194	10.9354	15.767
	0.0503364	0.0965308	Q9NZT1	Calmodulin-like protein 5	CALML5	10.0005	12.5533	11.5578	10.1303	10.8589	9.97342	10.9819	11.3743	11.4702	9.17025
	0.767902	1.46181	P27797	Calreticulin	CALR	13.7156	10.9711	13.3276	13.7865	12.8826	13.7302	10.0834	10.8401	14.5826	10.9223
	0.18461	0.32797	P27824	Calnexin	CANX	13.9217	13.9527	13.9185	12.4806	13.2363	13.6206	14.2979	10.8059	13.6216	14.0497
	0.337714	0.590374	P52907;P47755	F-actin-capping protein subunit alpha-1;F-actin-capping protein subunit alpha-2	CAPZA1;CAPZA2	12.7764	11.3666	13.3491	11.2137	10.1447	11.6246	9.62994	11.5142	12.5479	10.9298
	0.623929	-0.614383	P47756	F-actin-capping protein subunit beta	CAPZB	10.323	11.1768	10.5789	11.4194	10.6385	12.3568	12.3673	11.2931	12.2802	10.8459
	0.165704	-0.241265	Q86X55	Histone-arginine methyltransferase CARM1	CARM1	10.5151	11.5616	10.6839	12.8446	12.8295	10.8441	11.4159	12.3317	11.4389	11.9645
	0.438608	-1.23459	Q9HA77	Probable cysteine--tRNA ligase, mitochondrial	CARS2	10.3384	11.6835	13.3036	13.046	9.34378	14.4625	15.7872	10.7236	13.4082	13.1379
	0.829452	0.648396	P29466	Caspase-1;Caspase-1 subunit p20;Caspase-1 subunit p10	CASP1	11.9174	11.5023	12.1293	11.8328	10.2301	11.1328	10.2441	10.9001	11.4285	10.6635
	0.0585053	0.170816	P31944	Caspase-14;Caspase-14 subunit p17, mature form;Caspase-14 subunit p10, mature form;Caspase-14 subunit p20, intermediate form;Caspase-14 subunit p8, intermediate form	CASP14	13.7171	13.3405	12.3934	11.9484	11.3944	11.3167	10.8131	15.3172	12.4414	10.1522
	0.0004239	-0.00101884	P04040	Catalase	CAT	10.3646	12.0022	10.107	11.4995	9.95711	10.3514	10.5097	13.0766	10.3798	8.89236
	0.954324	1.61961	P16152	Carbonyl reductase [NADPH] 1	CBR1	14.5002	14.181	15.0316	15.8031	15.1405	14.4767	10.2332	14.4204	15.1187	13.1714
	1.2582	1.68291	O75828	Carbonyl reductase [NADPH] 3	CBR3	13.7166	11.6787	10.8517	13.3419	13.9405	13.1203	12.601	10.5145	10.3271	10.9257
	0.506152	0.598232	Q8N4T8	Carbonyl reductase family member 4	CBR4	12.2162	11.5007	11.4353	10.9135	10.3789	12.5422	11.0019	10.0504	12.1897	10.3564
	0.468359	-0.376456	P83916	Chromobox protein homolog 1	CBX1	10.6046	11.4296	10.304	10.5716	11.3531	11.7162	10.886	10.8898	11.6889	12.0273
	1.16094	2.1493	P45973	Chromobox protein homolog 5	CBX5	14.5848	10.7844	14.4135	15.0826	14.9968	14.4897	10.1449	13.7122	12.4035	11.3768
	0.222261	-0.240135	Q16773	Kynurenine--oxoglutarate transaminase 1	CCBL1	9.98954	11.9783	11.9379	10.7185	10.4146	11.2853	11.1717	11.5981	11.5466	10.8602
	0.395807	0.498172	Q96ER9	Coiled-coil domain-containing protein 51	CCDC51	10.164	11.5932	12.0413	10.9523	10.9455	11.1937	10.911	11.5338	11.2036	8.95233
	0.12495	-0.153403	P20248	Cyclin-A2	CCNA2	12.5666	10.4265	11.0364	11.4629	11.9656	11.7096	11.3965	11.0295	12.6216	11.6776
	0.29636	0.317614	P51946	Cyclin-H	CCNH	10.0251	10.0697	10.6523	10.6424	11.0343	11.2369	9.50615	11.3357	10.8833	9.44482
	1.68919	1.53668	P49368	T-complex protein 1 subunit gamma	CCT3	18.2385	17.8464	17.9499	18.8263	18.7353	17.3698	16.4584	16.5349	18.1383	15.3657
	1.35015	2.54926	P50991	T-complex protein 1 subunit delta	CCT4	17.5517	17.2223	17.4032	17.7138	17.9332	17.1019	15.5153	15.9278	17.2406	11.07
	0.0401391	0.111816	Q9UJX2	Cell division cycle protein 23 homolog	CDC23	13.314	9.61633	10.8687	13.7972	9.28147	11.2967	10.4237	11.5284	11.3544	11.6957
	0.531	-0.53719	P60953	Cell division control protein 42 homolog	CDC42	11.4126	10.938	11.9719	10.5902	10.0676	10.2525	11.1723	11.8522	12.1758	10.437
	0.968985	-0.60778	Q96GN5	Cell division cycle-associated 7-like protein	CDCA7L	10.2823	10.4035	10.6012	11.5718	11.0586	10.8582	10.6048	11.8236	11.328	11.8585
	1.74842	0.657093	P06493	Cyclin-dependent kinase 1	CDK1	15.4124	15.4586	15.749	15.8617	16.092	15.5524	14.7686	14.776	15.6941	14.8838
	0.438501	0.391143	P21127;Q9UQ88	Cyclin-dependent kinase 11B;Cyclin-dependent kinase 11A	CDK11B;CDK11A	10.4396	10.907	11.6468	11.4599	12.3329	11.273	10.2762	10.9656	11.7318	10.8346
	0.0198687	0.0265377	P50613	Cyclin-dependent kinase 7	CDK7	10.3711	10.704	11.9595	9.39704	10.9772	11.2001	10.9095	10.2688	10.7362	11.052
	0.223712	0.313451	P42771	Cyclin-dependent kinase inhibitor 2A	CDKN2A	12.8302	11.1246	10.7974	12.4909	12.8939	12.0925	10.7545	11.4036	11.9125	12.8285
	0.454334	0.810803	Q9NXV6	CDKN2A-interacting protein	CDKN2AIP	12.5206	12.79	10.3349	13.4363	13.0037	10.5788	10.9987	9.99386	12.8494	11.3577
	0.223543	-0.457462	Q15517	Corneodesmosin	CDSN	12.2424	13.4612	13.051	11.8424	11.4756	10.4389	11.1445	14.4165	11.3733	13.2365
	0.109137	0.163796	Q9Y232	Chromodomain Y-like protein	CDYL	11.1345	11.5882	11.9567	9.77846	10.1967	10.7791	9.89754	10.6178	12.0735	10.3784
	0.0951479	0.170498	Q8N8U2	Chromodomain Y-like protein 2	CDYL2	10.1462	12.2357	12.4783	11.6436	9.70313	10.5187	10.1336	11.7174	11.4633	10.4876
	0.130312	-0.125611	P17676	CCAAT/enhancer-binding protein beta	CEBPB	9.91051	10.3836	11.8306	11.0338	10.4052	11.2399	10.7501	11.2211	10.9816	10.7521
	0.135774	0.326413	Q9BXW7	Cat eye syndrome critical region protein 5	CECR5	16.7461	16.3932	16.4814	14.3325	15.814	17.3409	17.1417	16.1678	13.0822	17.0413
	0.558651	0.656996	Q92879	CUGBP Elav-like family member 1	CELF1	13.3899	13.1048	13.2611	13.5458	13.2843	13.2286	10.6524	13.8051	12.6794	13.4448
	0.0748355	-0.349226	P49454	Centromere protein F	CENPF	11.0987	14.952	12.0909	15.907	13.127	10.59	15.0506	10.5913	17.0861	10.5128
	0.725831	1.01559	Q7Z7K6	Centromere protein V	CENPV	12.8929	12.8846	10.3579	11.2416	12.5194	9.70094	10.5323	10.4451	10.8716	10.487
	0.313605	1.10535	Q0VF96	Cingulin-like protein 1	CGNL1	16.1952	10.4958	16.3811	10.5116	10.6117	11.396	10.546	12.1375	12.402	10.8873
	0.018298	0.0398183	Q9NX63	MICOS complex subunit MIC19	CHCHD3	11.1514	11.2874	9.16953	11.4189	9.98762	13.2319	10.9402	11.5232	10.1897	11.3521
	0.477675	-0.377085	Q12873	Chromodomain-helicase-DNA-binding protein 3	CHD3	10.962	10.8302	10.9749	10.4045	10.8899	10.5463	10.7368	12.4452	10.5661	10.832
	0.685878	1.07817	Q8IWX8	Calcium homeostasis endoplasmic reticulum protein	CHERP	13.2206	11.4348	13.4479	14.1146	14.2583	10.7193	11.3841	11.3727	12.6969	11.6972
	1.04396	1.38946	Q7LBR1	Charged multivesicular body protein 1b	CHMP1B	13.2975	11.1298	10.8644	12.6636	11.8939	9.33682	10.153	10.1244	9.99498	10.2939
	0.581889	0.542706	Q9UHD1	Cysteine and histidine-rich domain-containing protein 1	CHORDC1	12.3929	11.5535	12.6099	11.1592	12.5939	10.8074	11.7188	11.6262	10.5777	11.3176
	0.890112	0.861765	Q9Y3Y2	Chromatin target of PRMT1 protein	CHTOP	11.7932	11.3091	11.5226	10.634	9.69122	11.3405	9.10824	10.9815	10.6364	10.0205
	0.43853	-1.04072	Q969X6	Cirhin	CIRH1A	10.636	11.0728	10.6242	12.5002	10.01	13.05	14.625	10.2857	10.5381	13.9762
	0.633609	-0.532354	O14578	Citron Rho-interacting kinase	CIT	11.4726	10.256	10.6216	10.528	10.4655	9.23371	10.7761	11.6525	10.8228	10.5964
	0.131428	0.183454	P12277	Creatine kinase B-type	CKB	16.8852	14.4553	16.632	16.8664	16.7975	16.9067	15.5185	16.3477	16.584	16.5115
	0.145589	0.222713	P54105	Methylosome subunit pICln	CLNS1A	11.2127	11.1351	10.4426	11.3257	10.2938	9.09717	9.21705	10.4896	11.6618	10.0787
	0.465439	-0.948384	Q16740	ATP-dependent Clp protease proteolytic subunit, mitochondrial	CLPP	10.8886	11.3141	9.20356	9.99642	12.4957	13.5454	13.4574	12.8581	10.828	11.6126
	0.0791107	-0.116925	Q96KA5	Cleft lip and palate transmembrane protein 1-like protein	CLPTM1L	10.8237	11.4975	11.1078	9.74025	9.94417	11.7658	9.69953	11.3642	11.0339	11.6229
	0.492372	-0.966175	O76031	ATP-dependent Clp protease ATP-binding subunit clpX-like, mitochondrial	CLPX	15.4796	15.8292	15.7087	11.8604	14.9122	16.4081	16.5739	16.1243	14.5952	16.7035
	0.324955	0.659764	Q9HAW4	Claspin	CLSPN	12.2442	9.58675	9.81855	10.0933	13.7815	10.1974	10.2283	10.595	10.6751	9.67701
	1.42545	-0.317746	Q00610	Clathrin heavy chain 1	CLTC	17.0066	16.7403	17.1671	16.7979	16.8219	16.9894	16.9166	17.4926	17.3499	17.194
	0.539816	-0.975802	Q8NFW8	N-acylneuraminate cytidylyltransferase	CMAS	7.1642	11.3574	10.7507	11.3939	10.565	9.96648	10.6558	12.248	11.1243	10.6737
	0.524254	1.12802	P30085	UMP-CMP kinase	CMPK1	13.7334	10.1259	13.2539	13.7547	13.5276	10.4561	10.2519	11.1123	10.7591	13.2657
	0.55894	1.1062	Q9BQ75	Protein CMSS1	CMSS1	11.0019	11.2287	11.066	14.3362	14.7155	10.7444	10.4639	11.1727	11.3912	11.2759
	0.653032	0.929498	Q8N1G2	Cap-specific mRNA (nucleoside-2-O-)-methyltransferase 1	CMTR1	12.3775	10.283	12.47	11.8792	12.3145	11.312	9.52352	10.6803	12.8129	10.3561
	0.0285086	0.0465842	Q99439	Calponin-2	CNN2	10.5261	12.1435	12.2097	9.88283	11.3058	11.7581	11.0444	12.1365	10.3074	11.5427
	0.508026	0.996927	Q13057	Bifunctional coenzyme A synthase;Phosphopantetheine adenylyltransferase;Dephospho-CoA kinase	COASY	14.6316	11.3506	15.306	14.5635	14.8305	14.9492	13.8078	13.8299	11.2307	14.2315
	0.00503259	0.0075473	P38432	Coilin	COIL	11.6382	11.2339	11.3467	11.7927	11.6531	9.48096	10.3515	11.7777	11.5558	11.0485
	0.0906722	-0.243159	Q8NBJ5	Procollagen galactosyltransferase 1	COLGALT1	11.2476	11.9462	10.9981	10.1608	8.93099	12.9817	11.13	9.61367	13.6756	10.7302
	0.695319	-1.47373	P53621	Coatomer subunit alpha;Xenin;Proxenin	COPA	13.5316	9.72765	10.3833	11.5548	11.2725	13.7027	12.736	14.6889	11.0025	14.2493
	0.336378	-0.676097	P53618	Coatomer subunit beta	COPB1	11.4763	10.7589	9.9457	11.2815	10.7858	10.5108	8.75133	11.7754	11.505	13.8452
	0.776937	-1.16389	Q9Y678	Coatomer subunit gamma-1	COPG1	12.9498	11.3977	12.9581	10.7059	12.4946	11.6853	11.9381	13.7068	15.1421	11.9961
	0.0655832	0.131956	Q9UNS2	COP9 signalosome complex subunit 3	COPS3	13.2568	11.7385	13.026	12.6959	12.9191	9.81805	11.1412	12.8249	12.4959	11.9797
	0.390222	0.578258	O75208	Ubiquinone biosynthesis protein COQ9, mitochondrial	COQ9	11.6248	12.5513	12.3084	11.3335	10.7625	13.8499	12.5583	11.4301	11.6421	10.3435
	0.469628	0.64807	Q9ULV4	Coronin-1C	CORO1C	12.8611	11.6311	12.1965	11.845	9.82465	10.2023	10.6633	11.0395	11.3303	10.0818
	0.218909	0.352003	Q14019	Coactosin-like protein	COTL1	12.69	9.974	11.2303	11.525	12.0187	10.0692	10.5646	11.2152	11.9553	9.86172
	0.843889	0.913698	P13073	Cytochrome c oxidase subunit 4 isoform 1, mitochondrial	COX4I1	14.0472	13.7481	13.8512	13.4244	14.5941	14.8124	14.4059	13.7018	11.4749	13.0808
	0.0267805	0.065811	P20674	Cytochrome c oxidase subunit 5A, mitochondrial	COX5A	14.3526	14.1271	13.9156	11.2304	14.4755	15.7012	14.6272	14.0681	12.4569	14.4528
	0.380597	0.678916	P10606	Cytochrome c oxidase subunit 5B, mitochondrial	COX5B	13.0518	10.8545	12.9253	13.0075	14.1068	13.5577	14.2755	11.1493	11.4875	12.0411
	0.148717	-0.632057	P09669	Cytochrome c oxidase subunit 6C	COX6C	10.2705	13.352	11.5431	15.2935	8.28674	10.1019	10.3319	12.0507	15.7808	10.2632
	0.774107	-0.965275	P14406	Cytochrome c oxidase subunit 7A2, mitochondrial	COX7A2	10.8538	9.89618	11.289	11.5352	10.7719	10.4723	9.77384	12.3186	13.1079	11.8731
	1.024	1.3017	O75131	Copine-3	CPNE3	12.3117	11.3236	13.562	10.7468	13.1727	10.4679	11.3157	10.4269	10.0982	10.6756
	0.681093	-0.603517	P31327	Carbamoyl-phosphate synthase [ammonia], mitochondrial	CPS1	22.6845	22.2458	22.4716	22.1264	22.6952	23.562	24.4942	22.6969	22.4884	23.2582
	0.221941	0.572926	Q10570	Cleavage and polyadenylation specificity factor subunit 1	CPSF1	12.556	13.1557	9.72446	13.7707	9.18061	10.2476	11.0656	11.6225	9.69158	11.0853
	0.193504	-0.362308	Q9P2I0	Cleavage and polyadenylation specificity factor subunit 2	CPSF2	9.48986	11.0469	10.9596	11.2278	12.5981	10.4269	9.68313	12.8664	10.9092	11.8232
	0.514309	1.05095	Q16630	Cleavage and polyadenylation specificity factor subunit 6	CPSF6	13.3419	10.4439	13.2116	12.7637	13.7493	13.6476	9.29516	12.0069	13.7016	12.2313
	0.292768	0.592004	Q8N684	Cleavage and polyadenylation specificity factor subunit 7	CPSF7	12.5673	11.6321	12.1538	12.0825	11.9877	8.59174	10.0927	10.5188	12.5035	10.5271
	0.233742	0.490879	P23786	Carnitine O-palmitoyltransferase 2, mitochondrial	CPT2	15.6085	14.0504	13.9191	14.0979	14.5432	16.9679	16.1285	14.5788	12.4111	14.3761
	0.915964	0.972889	Q9BZJ0	Crooked neck-like protein 1	CRNKL1	11.734	12.2073	9.2658	11.5294	11.7522	11.648	9.89511	10.6432	10.8222	10.1724
	0.00524048	-0.0227715	Q9UBG3	Cornulin	CRNN	9.85516	11.1678	16.5892	9.76516	10.5555	8.65558	10.357	10.6711	11.9831	11.4722
	0.0780252	0.174332	Q5TZA2	Rootletin	CROCC	11.2995	10.8909	13.5439	10.7278	11.5515	10.6916	13.2386	11.4514	10.7984	9.61771
	0.202447	-0.512148	Q08257	Quinone oxidoreductase	CRYZ	12.8822	9.24704	12.7487	10.4092	10.935	13.257	12.977	10.86	13.7337	10.7973
	0.313718	-0.202689	O75390	Citrate synthase, mitochondrial	CS	18.1447	18.1457	18.016	17.7366	17.9279	19.1106	18.6592	18.2176	18.0029	18.652
	0.610334	0.644008	P55060	Exportin-2	CSE1L	22.4567	22.651	22.468	22.7141	22.3193	21.4518	19.998	22.1747	22.5735	22.0518
	0.802637	0.844221	Q8NEV1;P68400	Casein kinase II subunit alpha 3;Casein kinase II subunit alpha	CSNK2A3;CSNK2A1	9.09268	11.0352	11.5708	10.3493	11.3631	10.4262	8.85851	9.94939	10.605	9.76838
	0.714866	1.32025	P67870	Casein kinase II subunit beta	CSNK2B	12.79	10.5852	11.5129	12.5657	14.7915	10.2493	11.5981	10.4104	9.62276	11.4175
	0.0754306	0.2156	P21291	Cysteine and glycine-rich protein 1	CSRP1	10.5092	13.4619	10.5389	13.4812	10.968	10.2701	13.6852	10.1173	11.6082	9.87975
	0.134829	-0.358536	P01040	Cystatin-A;Cystatin-A, N-terminally processed	CSTA	11.1503	13.0335	14.0083	11.5065	11.7009	10.2448	13.5042	14.2975	10.6768	10.7184
	0.461946	1.03066	P04080	Cystatin-B	CSTB	11.3616	10.3227	15.2387	13.4939	11.7736	10.6193	10.8171	11.8125	11.8443	9.94335
	0.635957	0.965786	Q05048	Cleavage stimulation factor subunit 1	CSTF1	13.8144	12.1273	10.9252	12.4339	13.4738	10.8739	9.81565	11.9972	11.7375	11.6855
	0.189907	0.336116	Q8WYA6	Beta-catenin-like protein 1	CTNNBL1	12.2251	12.5601	12.5921	9.46077	12.5441	10.5281	10.987	10.9314	11.9034	11.4406
	0.459834	0.728934	O60716	Catenin delta-1	CTNND1	11.8968	11.7211	10.9667	11.2735	12.4732	9.70971	9.2569	12.5081	10.5564	10.1235
	0.0648753	0.130764	P07339	Cathepsin D;Cathepsin D light chain;Cathepsin D heavy chain	CTSD	10.5192	12.6482	11.1128	11.254	10.289	11.304	10.372	13.1634	10.9585	9.73455
	1.09488	-1.56598	P08311	Cathepsin G	CTSG	10.1268	11.8767	12.0833	11.2148	10.7702	10.8543	15.1398	12.2332	12.5019	11.0065
	1.42999	0.824248	Q13616	Cullin-1	CUL1	12.202	12.1861	12.3504	11.8254	12.2719	11.7369	10.857	10.587	12.3367	11.3041
	0.413898	0.42321	Q13617	Cullin-2	CUL2	12.4435	10.8154	11.1722	11.5483	12.2295	10.5465	10.8112	11.9611	10.8109	10.5609
	0.527307	-0.555044	Q13618	Cullin-3	CUL3	11.2716	10.3149	10.2628	10.988	9.47378	9.55806	9.79839	11.7049	11.3212	10.6418
	0.508942	0.575089	Q13619	Cullin-4A	CUL4A	12.0858	12.1766	11.0839	10.8627	12.6943	10.5508	10.1526	10.7301	11.1668	11.9529
	0.621136	1.00803	Q9NTM9	Copper homeostasis protein cutC homolog	CUTC	10.4469	10.589	12.6968	12.7183	10.5043	12.5225	10.0425	12.5264	9.64106	10.0765
	0.285391	0.669419	Q69YN2	CWF19-like protein 1	CWF19L1	12.4513	11.9951	14.8654	10.0664	11.4113	9.61878	10.4066	10.7995	11.8191	11.236
	0.179599	-0.338488	P00387	NADH-cytochrome b5 reductase 3;NADH-cytochrome b5 reductase 3 membrane-bound form;NADH-cytochrome b5 reductase 3 soluble form	CYB5R3	9.55291	12.0989	10.7571	11.9278	9.97487	10.8379	10.6973	13.1388	10.0321	10.9186
	0.00746162	-0.0194918	P08574	Cytochrome c1, heme protein, mitochondrial	CYC1	11.4765	12.4798	10.8889	10.1343	13.4401	13.8389	13.4112	12.6073	11.5966	10.6351
	0.178158	-0.346241	P61803	Dolichyl-diphosphooligosaccharide--protein glycosyltransferase subunit DAD1	DAD1	10.5149	12.2098	11.1763	13.7154	13.5954	13.5845	12.7433	13.3602	11.7855	13.3603
	0.798548	0.799091	Q3LXA3	Bifunctional ATP-dependent dihydroxyacetone kinase/FAD-AMP lyase (cyclizing);ATP-dependent dihydroxyacetone kinase;FAD-AMP lyase (cyclizing)	DAK	11.0634	10.7463	12.2396	12.4284	12.5205	12.59	10.8774	12.0589	11.368	10.2248
	0.34145	-0.752409	P51398	28S ribosomal protein S29, mitochondrial	DAP3	13.7836	13.7519	10.3002	13.3301	12.3166	13.9285	14.6393	14.3608	11.2384	14.3784
	0.385327	-0.706289	P14868	Aspartate--tRNA ligase, cytoplasmic	DARS	12.9363	11.1565	13.3347	9.73698	11.0903	13.1146	12.7062	13.1745	11.3369	13.1872
	0.131236	-0.259525	Q6PI48	Aspartate--tRNA ligase, mitochondrial	DARS2	17.433	15.7019	16.8894	15.0097	15.3266	18.0304	17.7468	16.1823	15.417	17.286
	0.121526	0.279261	Q9UER7	Death domain-associated protein 6	DAXX	13.4776	11.6788	11.4672	10.2273	10.6786	13.0809	10.9644	13.4974	10.1337	11.3611
	0.0435894	0.113848	Q96EP5	DAZ-associated protein 1	DAZAP1	13.1482	10.2726	12.8493	12.2466	9.61587	11.5701	10.4449	11.5497	13.5127	10.5056
	0.0382712	0.137724	P11182	Lipoamide acyltransferase component of branched-chain alpha-keto acid dehydrogenase complex, mitochondrial	DBT	14.6387	13.6896	14.2379	10.288	13.9933	16.3165	15.3025	14.328	10.9511	14.3101
	0.72458	-1.82217	P81605	Dermcidin;Survival-promoting peptide;DCD-1	DCD	14.054	11.1241	15.9973	10.9917	10.4828	14.5311	13.979	16.5486	14.1361	14.0791
	0.938598	1.6249	Q6PJP8	DNA cross-link repair 1A protein	DCLRE1A	13.9849	14.3732	13.8573	13.5996	13.543	11.4762	11.8206	14.5612	10.6272	10.3809
	0.0200828	-0.0379441	Q7Z4W1	L-xylulose reductase	DCXR	12.7465	11.9121	11.4744	12.4078	10.2462	11.8173	13.1453	10.2399	12.0248	11.8114
	1.18153	2.75409	Q92466	DNA damage-binding protein 2	DDB2	14.8467	14.4088	14.7223	15.2105	15.9049	11.1467	9.11892	11.07	15.0287	11.2592
	0.13974	0.229964	P39656	Dolichyl-diphosphooligosaccharide--protein glycosyltransferase 48 kDa subunit	DDOST	12.704	12.5126	12.8084	10.7191	13.3292	11.0806	11.6329	10.9733	12.9679	12.2754
	1.80628	0.766349	Q92841	Probable ATP-dependent RNA helicase DDX17	DDX17	19.1634	19.0272	18.994	19.0239	19.4034	18.9171	17.5273	18.4074	18.9632	18.3895
	0.966664	1.62995	Q9NVP1	ATP-dependent RNA helicase DDX18	DDX18	13.5225	13.5394	14.071	11.2494	12.3832	11.7339	10.2676	9.98985	13.7278	10.4945
	1.45118	1.18581	Q9NR30	Nucleolar RNA helicase 2	DDX21	17.9981	17.8224	18.1289	16.9674	17.3205	17.09	15.222	16.1586	17.6523	16.4421
	0.0504772	0.0912313	Q9GZR7	ATP-dependent RNA helicase DDX24	DDX24	10.8968	12.1235	10.0698	12.6122	9.99287	10.2656	10.1604	11.6746	11.3565	10.4174
	0.178888	-0.617247	Q5JSJ4	Protein DDX26B	DDX26B	10.5588	11.8865	11.5517	12.3382	10.3859	11.1006	9.9689	16.8619	10.4052	10.4473
	1.08568	1.37559	Q96GQ7	Probable ATP-dependent RNA helicase DDX27	DDX27	12.4488	12.9094	12.7669	10.5151	12.82	10.0627	10.1737	10.2282	11.3958	10.3818
	2.21063	-0.539824	O00571;O15523	ATP-dependent RNA helicase DDX3X;ATP-dependent RNA helicase DDX3Y	DDX3X;DDX3Y	15.4365	15.6284	15.0531	15.808	15.3463	15.6294	15.8387	16.0788	16.0102	16.1662
	1.4323	2.20363	Q9H0S4	Probable ATP-dependent RNA helicase DDX47	DDX47	15.1664	15.066	14.7648	14.3503	14.2502	13.8553	11.4252	13.4907	14.6792	9.89237
	1.15086	1.14492	P17844	Probable ATP-dependent RNA helicase DDX5	DDX5	16.2026	16.458	16.3125	16.5404	16.8266	15.9884	13.885	15.3411	17.0407	14.7059
	0.549651	-0.586112	Q9BQ39	ATP-dependent RNA helicase DDX50	DDX50	10.8097	10.224	11.6563	11.2538	10.0903	11.2849	11.6164	10.0268	12.2555	11.9918
	0.102194	0.266139	Q5T1V6	Probable ATP-dependent RNA helicase DDX59	DDX59	13.4301	11.5738	10.1312	11.0687	13.4333	10.3713	9.82496	12.6291	10.2917	12.862
	0.0498269	0.0911616	Q16698	2,4-dienoyl-CoA reductase, mitochondrial	DECR1	16.7291	16.3785	16.4724	16.232	16.5427	17.6574	17.6835	16.8099	14.3951	17.4215
	0.285825	-0.600232	P59666;P59665	Neutrophil defensin 3;HP 3-56;Neutrophil defensin 2;Neutrophil defensin 1;HP 1-56;Neutrophil defensin 2	DEFA3;DEFA1	10.5397	11.6362	9.73396	11.3685	10.7198	11.9375	14.1653	12.0841	10.3789	9.72964
	0.20738	-0.297126	Q96QD5	DEP domain-containing protein 7	DEPDC7	9.97657	10.6546	10.972	10.1883	10.9808	11.9534	10.4864	12.6789	11.0993	10.0744
	0.873752	1.05483	O00273	DNA fragmentation factor subunit alpha	DFFA	12.7296	12.6893	10.1508	12.0764	12.6829	11.4733	10.4272	9.87408	11.7954	11.5522
	0.0518689	0.149398	Q9BTZ2	Dehydrogenase/reductase SDR family member 4	DHRS4	13.5854	13.1525	13.6156	11.6451	10.6584	14.481	14.1952	13.5448	13.0117	10.0761
	0.125088	-0.191277	Q96HY7	Probable 2-oxoglutarate dehydrogenase E1 component DHKTD1, mitochondrial	DHTKD1	10.5646	10.8196	11.4348	10.73	10.036	10.4139	10.4241	10.2032	12.8415	9.9622
	1.46088	3.4114	O43143	Pre-mRNA-splicing factor ATP-dependent RNA helicase DHX15	DHX15	18.5922	18.3523	18.5361	18.9428	19.0825	18.047	10.3262	15.9906	18.0564	16.3498
	0.280692	-0.914992	Q7L2E3	Putative ATP-dependent RNA helicase DHX30	DHX30	10.669	14.5128	13.0702	11.024	12.5797	15.7458	15.2169	14.9515	10.295	14.931
	0.217364	-0.370274	Q9H2U1	ATP-dependent RNA helicase DHX36	DHX36	9.50517	11.9416	10.0092	11.1324	9.41072	10.2439	9.01557	10.9965	11.7471	11.2172
	0.0166731	-0.0509146	Q8IY37	Probable ATP-dependent RNA helicase DHX37	DHX37	13.2942	12.4992	10.4739	10.4925	11.1342	10.173	9.41818	10.9234	14.3232	10.9169
	0.91556	1.40125	Q92620	Pre-mRNA-splicing factor ATP-dependent RNA helicase PRP16	DHX38	13.6607	10.9319	10.9375	9.51185	12.8971	10.704	10.3713	9.60958	10.5566	9.61958
	1.0235	0.94564	Q08211	ATP-dependent RNA helicase A	DHX9	19.4815	19.52	19.3958	19.69	19.7639	18.8474	16.9338	18.5579	19.8261	18.6988
	0.473403	0.753441	Q9BTC0	Death-inducer obliterator 1	DIDO1	12.9572	12.1251	11.9313	12.7917	9.98911	11.7862	9.47452	12.4971	11.1732	11.5618
	0.150541	0.277154	Q68CQ4	Digestive organ expansion factor homolog	DIEXF	12.6579	10.8036	9.85543	10.7646	12.3777	9.943	9.48151	10.7886	11.5179	11.3715
	1.08673	-0.561074	P10515	Dihydrolipoyllysine-residue acetyltransferase component of pyruvate dehydrogenase complex, mitochondrial	DLAT	17.7279	17.4767	17.6273	16.9754	17.4084	18.3732	18.5549	17.9889	17.6861	18.4071
	0.0831672	-0.130413	P09622	Dihydrolipoyl dehydrogenase, mitochondrial	DLD	16.0707	15.642	15.2273	14.5307	15.4494	16.8498	16.7085	15.8711	14.294	16.1614
	1.57809	-0.597252	P36957	Dihydrolipoyllysine-residue succinyltransferase component of 2-oxoglutarate dehydrogenase complex, mitochondrial	DLST	16.9458	16.7734	16.6233	17.2348	16.9025	17.7619	17.7229	17.4831	17.8502	17.4939
	0.185866	-0.353352	Q9UGM3	Deleted in malignant brain tumors 1 protein	DMBT1	12.4323	11.4901	11.1596	10.4917	11.7232	13.7246	13.5313	12.9342	11.3361	10.9596
	1.51871	-5.04281	Q6ZR08	Dynein heavy chain 12, axonemal	DNAH12	16.7856	11.123	10.3414	10.9864	9.0228	10.5534	18.8539	18.2994	17.3439	11.549
	0.535235	-1.40339	Q96EY1	DnaJ homolog subfamily A member 3, mitochondrial	DNAJA3	15.4629	15.4192	14.4882	10.4204	14.4717	17.3949	16.5777	16.5592	14.5344	16.3804
	1.42097	2.61693	P25685	DnaJ homolog subfamily B member 1	DNAJB1	14.773	14.6987	14.2789	14.5191	14.2653	14.6494	10.8637	13.8953	14.2436	8.65263
	0.380913	-0.38176	Q9NVM6	DnaJ homolog subfamily C member 17	DNAJC17	9.75153	11.2363	11.131	11.3389	10.4161	10.1351	10.9916	10.9662	12.0176	10.2242
	0.0060076	0.0115709	Q96DA6	Mitochondrial import inner membrane translocase subunit TIM14	DNAJC19	11.8743	9.74958	11.5639	10.8483	9.83362	12.5311	10.3239	11.1154	12.1104	10.6713
	0.0710209	0.108319	Q99615	DnaJ homolog subfamily C member 7	DNAJC7	10.6892	12.4737	9.77116	11.5757	9.75179	10.7508	10.2806	10.8743	10.913	10.8403
	1.21723	1.55025	O75937	DnaJ homolog subfamily C member 8	DNAJC8	13.8473	11.5813	11.068	13.7317	14.1167	11.5254	11.1534	10.9676	11.1644	11.0938
	0.635891	-0.454951	O00429	Dynamin-1-like protein	DNM1L	10.2518	11.5286	11.0262	10.0761	10.7097	10.1413	10.46	11.6256	11.0011	11.2223
	0.722566	0.801283	O60762	Dolichol-phosphate mannosyltransferase subunit 1	DPM1	12.0854	11.9779	10.6028	10.3207	12.0041	10.3808	10.571	10.5388	11.3235	9.27615
	0.266074	0.321749	Q9C005	Protein dpy-30 homolog	DPY30	9.80966	10.6259	10.295	11.8304	11.5676	11.4078	11.03	11.4434	9.96274	9.96779
	1.67977	1.62435	Q14919	Dr1-associated corepressor	DRAP1	13.0802	12.9177	12.8273	12.9967	12.76	10.6835	9.99981	10.851	11.9619	10.8669
	0.565569	-1.5397	Q08554	Desmocollin-1	DSC1	10.653	14.6203	14.3307	9.50933	12.964	10.0399	14.4336	14.8903	11.3078	13.6052
	0.967293	-2.52345	Q02413	Desmoglein-1	DSG1	13.8028	16.5401	16.0319	12.2414	10.329	13.2735	16.5721	17.9879	13.6445	16.7018
	0.454331	-1.48759	P15924	Desmoplakin	DSP	17.1798	17.1785	17.3509	14.9213	11.3332	16.844	18.0037	18.3681	13.9356	18.848
	0.75339	0.588082	P51452	Dual specificity protein phosphatase 3	DUSP3	9.69048	11.4293	11.6545	11.4958	10.8981	10.5241	9.96369	10.5815	10.495	10.4023
	1.29075	1.18477	P33316	Deoxyuridine 5-triphosphate nucleotidohydrolase, mitochondrial	DUT	15.7772	15.2743	15.4074	16.0394	16.2754	15.1636	15.6863	13.2136	15.2281	13.7577
	0.209143	-0.544312	Q14204	Cytoplasmic dynein 1 heavy chain 1	DYNC1H1	12.6485	12.6728	14.0351	10.622	13.5212	13.5761	10.3504	13.862	15.36	13.9886
	0.0549115	-0.132223	Q96FJ2;P63167	Dynein light chain 2, cytoplasmic;Dynein light chain 1, cytoplasmic	DYNLL2;DYNLL1	13.3491	13.0055	9.93447	10.7305	10.7497	11.7851	11.5652	11.4186	13.467	10.4478
	0.516462	1.20388	Q99848	Probable rRNA-processing protein EBP2	EBNA1BP2	13.7926	13.955	14.0635	13.8089	9.39226	13.3478	10.9761	10.5229	13.8771	12.0484
	0.874852	-1.56579	Q15125	3-beta-hydroxysteroid-Delta(8),Delta(7)-isomerase	EBP	12.2207	13.1764	10.9049	9.34644	9.20857	9.73747	10.7379	13.0186	12.8354	12.7341
	0.174443	-0.284476	Q13011	Delta(3,5)-Delta(2,4)-dienoyl-CoA isomerase, mitochondrial	ECH1	17.1439	16.7928	16.5791	15.0582	16.3675	17.8905	17.6943	16.9509	15.3909	17.6565
	0.0280433	0.0611565	P30084	Enoyl-CoA hydratase, mitochondrial	ECHS1	16.8274	15.7161	16.863	15.4111	16.5962	17.8219	18.3126	14.6837	15.9171	16.9992
	0.23809	0.789584	P42126	Enoyl-CoA delta isomerase 1, mitochondrial	ECI1	13.9659	12.6523	13.405	11.4134	14.1699	15.8285	15.597	10.6752	9.99534	14.8641
	0.0573106	-0.173536	O75521	Enoyl-CoA delta isomerase 2, mitochondrial	ECI2	13.4964	13.3106	10.5179	10.3093	10.9227	14.0111	14.0872	10.38	11.4746	13.131
	1.20199	1.3078	Q9H8V3	Protein ECT2	ECT2	10.7787	10.5441	12.9208	10.479	12.7743	11.193	9.69598	9.99413	10.9097	9.96225
	0.158452	0.24365	O60869	Endothelial differentiation-related factor 1	EDF1	12.2977	10.4485	9.92392	12.4861	12.3579	11.6535	11.3029	10.547	11.8752	11.412
	0.105664	-0.182185	P24534	Elongation factor 1-beta	EEF1B2	11.1712	11.3149	9.57313	10.0861	11.0045	12.5096	10.6266	12.5014	10.4164	10.9573
	0.519794	-1.05902	P29692	Elongation factor 1-delta	EEF1D	13.1602	13.9531	14.1674	13.284	9.11417	13.4031	13.7603	14.067	13.6192	14.1777
	0.0854284	-0.19508	O43324	Eukaryotic translation elongation factor 1 epsilon-1	EEF1E1	9.97299	11.7118	13.4851	10.9984	9.65403	10.7671	12.1645	12.3365	10.6576	10.0146
	0.184159	-0.0953242	P26641	Elongation factor 1-gamma	EEF1G	16.439	16.4898	17.0284	16.3522	16.3339	16.4403	16.0803	16.6579	17.0428	16.6561
	1.18433	-0.307266	P13639	Elongation factor 2	EEF2	18.0852	18.1174	18.3857	18.2434	18.2801	18.4892	18.1831	18.8618	18.4887	18.7628
	1.37552	1.15426	Q96C19	EF-hand domain-containing protein D2	EFHD2	13.124	12.193	12.5109	12.3206	11.3581	11.5675	12.2171	11.0904	10.1787	10.6129
	0.175282	0.210795	P41567	Eukaryotic translation initiation factor 1	EIF1	10.6829	11.6319	10.6871	11.5757	11.371	10.458	10.1232	10.9983	12.2104	10.0959
	0.115781	0.155053	P19525	Interferon-induced, double-stranded RNA-activated protein kinase	EIF2AK2	11.359	11.192	9.8526	10.8266	11.3278	12.3423	11.0716	11.8011	11.071	10.0362
	0.19854	-0.243821	P05198	Eukaryotic translation initiation factor 2 subunit 1	EIF2S1	13.4198	12.8197	11.1579	13.3644	13.6193	13.1492	12.7221	13.4429	12.8991	13.5981
	1.02622	-1.18845	P20042	Eukaryotic translation initiation factor 2 subunit 2	EIF2S2	10.0851	12.6286	10.9555	9.87871	10.1603	12.3167	11.8527	12.3786	12.5628	11.9763
	0.223274	-0.474692	P41091;Q2VIR3	Eukaryotic translation initiation factor 2 subunit 3;Putative eukaryotic translation initiation factor 2 subunit 3-like protein	EIF2S3;EIF2S3L	12.7255	10.1642	11.1516	10.2703	12.9381	11.9026	13.0455	11.8055	13.2657	9.88362
	0.356818	0.588003	Q14152	Eukaryotic translation initiation factor 3 subunit A	EIF3A	12.9503	13.1932	13.5427	10.8311	10.7132	12.0537	10.7433	11.3124	11.5198	12.9287
	1.40426	-1.13027	O00303	Eukaryotic translation initiation factor 3 subunit F	EIF3F	9.44881	11.0044	11.0087	10.3	11.3298	11.3254	12.4671	11.4388	11.1448	12.4152
	0.357214	0.646126	Q9Y262	Eukaryotic translation initiation factor 3 subunit L	EIF3L	11.4126	11.42	10.6469	12.739	12.609	9.92359	11.4028	8.86113	12.2141	10.7716
	1.10807	-0.653836	P60842;Q14240	Eukaryotic initiation factor 4A-I;Eukaryotic initiation factor 4A-II;Eukaryotic initiation factor 4A-II, N-terminally processed	EIF4A1;EIF4A2	17.217	15.9564	17.1289	16.9284	17.1752	17.8318	17.4318	17.7471	17.6457	17.9492
	0.525205	0.504521	Q04637	Eukaryotic translation initiation factor 4 gamma 1	EIF4G1	13.4464	12.4773	12.9075	12.6294	12.7696	12.646	12.8059	10.7206	12.8944	12.8117
	0.678391	1.15454	Q15056	Eukaryotic translation initiation factor 4H	EIF4H	13.986	11.5295	14.4283	11.1642	13.533	14.2282	13.6018	11.516	11.617	11.2265
	0.16871	0.154635	P63241	Eukaryotic translation initiation factor 5A-1	EIF5A	17.1732	16.7825	16.7379	17.6573	17.9887	16.973	17.0632	17.1506	17.7945	16.2483
	0.161504	0.309371	P56537	Eukaryotic translation initiation factor 6	EIF6	9.75964	10.92	12.7759	11.9975	10.4681	12.9081	10.6269	11.4867	12.2679	10.2673
	0.905233	1.22322	Q92979	Ribosomal RNA small subunit methyltransferase NEP1	EMG1	13.8817	13.3257	13.1582	10.9916	12.8008	12.6263	10.777	11.6559	13.3418	10.5219
	0.347845	1.39116	P09104	Gamma-enolase	ENO2	11.0555	16.2922	11.7641	16.116	16.3131	10.4893	10.6066	11.2306	15.9418	11.3431
	1.0404	-0.767832	P58107	Epiplakin	EPPK1	10.3787	11.2725	10.5779	9.83982	11.1075	10.8962	11.8176	10.3232	11.8314	11.8142
	1.49238	-1.44007	P07814	Bifunctional glutamate/proline--tRNA ligase;Glutamate--tRNA ligase;Proline--tRNA ligase	EPRS	10.8167	11.1593	10.8705	10.4696	10.4026	12.5752	12.8504	12.9849	11.0562	13.0648
	0.731675	-1.13509	O75616	GTPase Era, mitochondrial	ERAL1	12.3596	10.3014	11.9574	11.6339	9.95131	10.1237	14.2383	10.8349	11.9179	11.7675
	0.00262199	-0.00263182	P19447	TFIIH basal transcription factor complex helicase XPB subunit	ERCC3	11.9165	11.1881	10.8435	11.1093	10.698	11.1327	10.3118	11.8588	11.4313	11.0007
	0.0349113	-0.0654632	Q92889	DNA repair endonuclease XPF	ERCC4	13.2569	10.9134	10.3292	10.916	10.3898	11.8299	10.8302	12.4923	10.6643	11.3651
	1.33903	1.36241	P84090	Enhancer of rudimentary homolog	ERH	15.1408	14.8784	14.7797	15.3691	15.228	14.9771	14.3632	14.5835	11.5622	14.2902
	0.175818	-0.387695	Q7Z2K6	Endoplasmic reticulum metallopeptidase 1	ERMP1	13.5505	14.0022	11.4376	11.9024	9.68976	12.7012	12.9392	11.8017	12.0195	13.6461
	0.0285418	-0.0566185	P10768	S-formylglutathione hydrolase	ESD	11.8024	11.9539	10.8052	12.0114	8.9086	11.0402	10.4386	10.4081	12.0312	11.6964
	0.032139	-0.0551871	P11474;O95718	Steroid hormone receptor ERR1;Steroid hormone receptor ERR2	ESRRA;ESRRB	11.6968	10.1112	11.0035	9.77447	10.5334	9.63502	9.3097	11.9523	10.0786	10.7164
	0.050904	-0.0926127	Q9BSJ8	Extended synaptotagmin-1	ESYT1	9.00759	10.7828	11.0938	11.0901	12.028	11.2447	11.248	12.0013	10.9883	9.63081
	0.00299708	-0.00515389	P62495	Eukaryotic peptide chain release factor subunit 1	ETF1	11.3347	10.8979	10.663	11.9002	9.69469	11.5528	10.0907	11.0031	12.5053	10.4505
	0.0398774	-0.0355538	P13804	Electron transfer flavoprotein subunit alpha, mitochondrial	ETFA	18.8652	18.7145	18.6997	18.3504	18.3256	19.7329	19.2527	19.0205	18.248	18.7464
	0.580872	-0.504	P38117	Electron transfer flavoprotein subunit beta	ETFB	16.8505	16.7748	16.9657	16.946	16.7832	18.6063	18.1452	17.7275	16.9338	17.8271
	0.0923864	0.180288	O95571	Persulfide dioxygenase ETHE1, mitochondrial	ETHE1	10.3434	11.9743	11.9799	10.1599	10.3847	13.228	11.4822	11.1557	12.0371	9.984
	0.484344	0.507243	Q01844	RNA-binding protein EWS	EWSR1	11.7672	11.4963	11.3785	9.86928	11.1534	12.1759	11.1299	11.1392	9.75676	11.1721
	1.32132	2.2241	Q13868	Exosome complex component RRP4	EXOSC2	14.2458	13.797	13.4861	14.2216	14.0399	10.0009	10.8013	10.3245	12.7668	10.4052
	0.168126	-0.284225	Q9NQT4	Exosome complex component RRP46	EXOSC5	10.5479	11.1367	11.4909	13.0796	9.32107	11.5999	10.9015	12.0454	11.595	11.3791
	0.127704	-0.181977	Q15024	Exosome complex component RRP42	EXOSC7	10.6894	11.136	10.8896	11.8372	10.0758	9.53372	9.95175	12.0826	10.731	10.7372
	0.00100083	-0.00250387	Q96B26	Exosome complex component RRP43	EXOSC8	12.6639	9.95779	12.1407	11.0706	9.34719	11.1541	9.08661	12.2683	11.5959	11.2821
	0.175045	-0.44012	P15311;P35241	Ezrin;Radixin	EZR;RDX	12.8748	12.7601	11.6248	12.0934	13.144	13.1661	16.5561	11.4405	11.7867	12.4194
	0.0304942	0.108457	Q01469	Fatty acid-binding protein, epidermal	FABP5	14.3587	15.1422	15.352	14.3778	10.4524	14.8465	14.4076	14.7927	11.0117	15.7072
	0.106844	-0.300914	Q6P587	Acylpyruvase FAHD1, mitochondrial	FAHD1	14.0916	14.6688	14.4108	11.3026	11.5032	15.7718	14.1189	14.7683	12.086	14.7297
	0.0618189	0.0756927	Q96GK7;Q6P2I3	Fumarylacetoacetate hydrolase domain-containing protein 2A;Fumarylacetoacetate hydrolase domain-containing protein 2B	FAHD2A;FAHD2B	11.2496	10.5617	10.3705	12.0072	11.2358	10.0211	10.0299	11.3006	11.2728	10.7245
	0.169433	0.383976	Q96A26	Protein FAM162A	FAM162A	12.9032	10.3164	12.8046	9.99578	12.9906	13.0665	13.197	12.0319	10.9204	10.3662
	1.02778	1.09185	Q14320;Q9Y247	Protein FAM50A;Protein FAM50B	FAM50A;FAM50B	12.0326	12.6065	12.5472	10.6915	12.7623	10.5504	10.3029	10.3741	11.765	10.6509
	0.00372464	-0.00991058	Q52LJ0	Protein FAM98B	FAM98B	10.8455	11.4587	10.5577	10.8591	13.607	11.2791	10.6038	14.0787	10.6505	10.4448
	0.0748328	0.11682	O15360	Fanconi anemia group A protein	FANCA	10.3615	10.3557	10.1593	11.7256	12.7811	10.4738	11.0095	11.3835	10.2667	10.7776
	0.766105	0.78287	Q8NB91	Fanconi anemia group B protein	FANCB	12.5085	10.9154	10.9609	13.0279	10.7887	11.4259	10.1965	10.9102	11.4363	10.7436
	0.492783	-0.497973	Q9NSD9	Phenylalanine--tRNA ligase beta subunit	FARSB	10.4355	10.856	11.6132	9.88096	10.4573	9.54537	9.9638	11.6738	10.9328	11.2803
	0.24968	-0.288163	P49327	Fatty acid synthase;[Acyl-carrier-protein] S-acetyltransferase;[Acyl-carrier-protein] S-malonyltransferase;3-oxoacyl-[acyl-carrier-protein] synthase;3-oxoacyl-[acyl-carrier-protein] reductase;3-hydroxyacyl-[acyl-carrier-protein] dehydratase;Enoyl-[acyl-carrier-protein] reductase;Oleoyl-[acyl-carrier-protein] hydrolase	FASN	17.2844	16.7623	16.933	16.0195	16.7256	17.5876	15.754	17.9832	17.2877	17.6693
	0.0336125	-0.0759253	Q7L8L6	FAST kinase domain-containing protein 5	FASTKD5	10.6745	12.6779	11.6642	11.3919	9.38631	12.6758	12.9948	10.708	11.7717	10.4762
	1.71311	1.55046	P22087	rRNA 2-O-methyltransferase fibrillarin	FBL	16.12	15.7604	14.2871	15.1379	15.3704	15.8766	13.2049	13.2823	15.4131	13.5994
	1.67097	1.505	P14324	Farnesyl pyrophosphate synthase	FDPS	17.0032	16.1568	16.3534	17.0993	17.1675	17.0547	13.688	15.1159	16.4666	15.9327
	0.23587	0.427551	P22570	NADPH:adrenodoxin oxidoreductase, mitochondrial	FDXR	11.8298	12.0424	12.7092	11.1051	12.1171	13.5331	13.353	10.7127	10.2359	12.8794
	0.179207	-0.277775	P22830	Ferrochelatase, mitochondrial	FECH	10.045	11.555	10.9692	11.4507	10.7844	12.6775	12.6839	12.0897	10.9075	10.4177
	0.415452	0.516104	P07954	Fumarate hydratase, mitochondrial	FH	16.551	16.5442	16.7272	16.2426	16.5858	17.2343	17.3554	14.2036	16.6138	16.3529
	0.0503496	0.0624961	P62942	Peptidyl-prolyl cis-trans isomerase FKBP1A	FKBP1A	11.7314	11.8099	10.6402	11.1784	10.1736	11.3885	10.3011	11.5177	10.6411	11.9048
	1.14839	1.08566	Q02790	Peptidyl-prolyl cis-trans isomerase FKBP4;Peptidyl-prolyl cis-trans isomerase FKBP4, N-terminally processed	FKBP4	16.6657	16.1516	16.3553	16.774	16.7993	16.2423	13.6884	15.7924	16.7197	15.449
	1.33045	1.99446	Q13451	Peptidyl-prolyl cis-trans isomerase FKBP5;Peptidyl-prolyl cis-trans isomerase FKBP5, N-terminally processed	FKBP5	13.2796	11.015	9.40708	12.7555	13.699	12.7916	10.2149	10.6848	9.61902	10.1353
	0.442644	0.74288	Q8NFF5	FAD synthase;Molybdenum cofactor biosynthesis protein-like region;FAD synthase region	FLAD1	12.8015	9.55067	10.3217	11.8875	12.5047	13.2786	10.8573	11.4958	10.8912	10.6806
	1.39975	-0.648707	P21333	Filamin-A	FLNA	15.845	15.3171	16.3808	15.8508	15.5574	16.5877	16.8855	16.4337	16.3293	16.6388
	0.292338	0.799716	Q96CP2	FLYWCH family member 2	FLYWCH2	9.98738	14.7923	9.55286	13.084	10.6618	10.0188	10.4112	11.256	11.4855	9.04656
	0.323527	0.6728	P85037	Forkhead box protein K1	FOXK1	12.7952	12.2486	12.4193	13.5164	12.9182	9.7972	10.5083	10.1576	13.379	12.3938
	0.105799	0.19335	Q96CU9	FAD-dependent oxidoreductase domain-containing protein 1	FOXRED1	12.2404	11.0414	11.7279	9.75441	10.5934	12.252	9.39617	11.252	11.909	11.7425
	0.0608857	0.0416938	Q16658	Fascin	FSCN1	14.9545	15.2737	15.2537	15.6631	15.4656	15.0241	14.5053	15.5086	15.6754	15.2338
	0.00623996	0.0120681	Q9C0B1	Alpha-ketoglutarate-dependent dioxygenase FTO	FTO	12.7083	12.4855	10.2735	10.4434	12.0649	10.5071	11.5577	12.4669	10.7691	10.813
	0.885766	0.605112	Q96AE4	Far upstream element-binding protein 1	FUBP1	17.6559	17.7255	17.8893	17.7414	18.168	17.4652	16.963	16.393	18.3889	16.9317
	0.147587	0.358497	Q96I24	Far upstream element-binding protein 3	FUBP3	10.0415	13.2986	12.9724	10.8419	13.2684	11.0128	11.8999	9.64071	13.2019	11.4473
	1.05016	1.83877	P35637	RNA-binding protein FUS	FUS	15.1127	15.1675	13.3071	14.5411	15.8655	15.5313	12.1446	10.6325	15.332	14.2192
	0.798714	0.609175	P51114;Q06787;P51116	Fragile X mental retardation syndrome-related protein 1;Fragile X mental retardation protein 1;Fragile X mental retardation syndrome-related protein 2	FXR1;FMR1;FXR2	12.1414	12.3509	11.021	11.5281	12.3555	11.6787	10.8863	10.9008	12.3116	10.8484
	0.350638	-0.69299	Q13283	Ras GTPase-activating protein-binding protein 1	G3BP1	9.46203	10.9507	11.0938	9.74939	12.8709	10.4733	9.17802	12.3128	12.1041	12.2438
	0.452572	-0.620106	Q8TAE8	Growth arrest and DNA damage-inducible proteins-interacting protein 1	GADD45GIP1	10.5606	10.0278	11.3291	11.4195	9.55611	11.5648	12.289	11.4146	12.0612	9.68759
	0.142075	0.254557	Q14376	UDP-glucose 4-epimerase	GALE	12.1332	12.3074	12.345	11.8739	10.7	9.02164	11.5062	10.7851	11.4572	10.8207
	0.106886	-0.171555	P51570	Galactokinase	GALK1	12.5485	11.0527	10.7502	9.81444	9.69584	10.2965	10.0588	11.1684	11.6262	10.605
	0.137413	0.231374	Q01415	N-acetylgalactosamine kinase	GALK2	12.5802	12.2228	12.2561	10.0476	10.1533	11.3377	10.7977	11.829	11.8653	10.3144
	0.267071	-0.621181	Q14697	Neutral alpha-glucosidase AB	GANAB	13.8425	10.173	14.5129	14.2047	14.6219	15.0183	14.0937	13.2535	15.0126	15.0405
	0.09449	0.33657	P17677	Neuromodulin	GAP43	10.0269	16.5589	10.8373	10.4282	10.121	10.4458	11.8825	10.7628	10.8862	10.7343
	2.02548	0.339809	P04406	Glyceraldehyde-3-phosphate dehydrogenase	GAPDH	19.8333	20.0639	19.903	19.625	19.8761	19.7595	19.6766	19.4544	19.5905	19.293
	0.744278	1.13622	Q9NY12	H/ACA ribonucleoprotein complex subunit 1	GAR1	13.4031	13.1551	13.3187	10.4739	13.5139	13.291	9.97978	11.9327	12.079	12.9008
	0.297654	-0.637179	P41250	Glycine--tRNA ligase	GARS	9.35056	9.68115	10.5593	10.8214	12.9703	12.9883	11.9129	12.3161	12.4342	10.1328
	0.474447	-0.169374	P22102	Trifunctional purine biosynthetic protein adenosine-3;Phosphoribosylamine--glycine ligase;Phosphoribosylformylglycinamidine cyclo-ligase;Phosphoribosylglycinamide formyltransferase	GART	14.6029	14.4158	14.2712	14.9044	14.6941	14.2393	14.3611	14.8488	14.6358	14.917
	0.0205381	-0.112315	P54826	Growth arrest-specific protein 1	GAS1	14.29	16.3113	15.2674	15.1969	10.0411	9.32476	14.5767	9.3472	15.614	14.5324
	0.75831	1.31082	O75323	Protein NipSnap homolog 2	GBAS	10.2441	13.56	13.875	11.3314	13.4911	13.0265	9.96561	12.5345	11.9631	10.6456
	0.689886	1.22239	Q04446	1,4-alpha-glucan-branching enzyme	GBE1	15.0926	15.3355	15.7991	14.9886	15.4723	15.546	14.7542	15.6248	10.8897	15.3311
	0.0425393	-0.133014	Q92947	Glutaryl-CoA dehydrogenase, mitochondrial	GCDH	10.1617	11.8942	12.7716	14.1568	12.2998	14.5773	14.9686	10.6909	13.4868	11.96
	1.67899	-1.73087	Q92616	Translational activator GCN1	GCN1L1	12.2084	11.6025	11.6484	10.8366	9.52877	10.4833	11.556	12.8642	13.6279	13.0808
	0.249627	0.466551	P50395	Rab GDP dissociation inhibitor beta	GDI2	13.344	10.79	13.3154	13.0085	13.118	13.4555	13.1719	12.2765	10.3757	13.664
	0.430788	0.882396	P57678	Gem-associated protein 4	GEMIN4	10.5656	12.7409	12.9383	10.0544	13.0305	10.0918	10.306	10.2451	12.6945	9.50585
	0.121202	-0.060863	Q96RP9	Elongation factor G, mitochondrial	GFM1	17.29	17.4392	17.2981	17.2518	17.0182	18.0119	17.5056	17.5719	17.1419	17.5635
	0.173033	0.364502	Q969S9	Ribosome-releasing factor 2, mitochondrial	GFM2	13.2569	12.8629	10.292	10.399	10.8957	13.3291	11.0937	12.8352	10.8308	11.1394
	0.454544	-0.451766	Q9H3K2	Growth hormone-inducible transmembrane protein	GHITM	10.8762	11.301	11.5493	10.038	11.617	12.3986	11.3886	11.2219	12.3587	12.0246
	0.766698	1.12612	Q14691	DNA replication complex GINS protein PSF1	GINS1	13.1327	11.0592	10.7212	13.3078	13.5509	11.1039	10.7114	11.4016	11.9665	9.99984
	0.913178	1.20713	Q9BRX5	DNA replication complex GINS protein PSF3	GINS3	13.561	12.8663	13.399	11.137	13.7017	10.7596	12.0223	11.5723	10.6654	11.1947
	0.845725	0.94977	Q9BRT9	DNA replication complex GINS protein SLD5;DNA replication complex GINS protein SLD5, N-terminally processed	GINS4	12.36	12.5256	10.8007	12.2419	11.5859	11.5589	10.2378	10.5778	12.6908	10.0765
	0.385727	1.04184	Q04760	Lactoylglutathione lyase	GLO1	11.331	11.6454	10.98	14.6142	15.0891	13.9046	11.9237	11.7806	14.2937	9.54416
	0.664916	-0.836295	Q86SX6	Glutaredoxin-related protein 5, mitochondrial	GLRX5	11.9049	11.0808	9.74294	11.14	9.86346	11.9739	13.1139	10.855	11.3735	11.8068
	0.504377	-0.363086	O94925	Glutaminase kidney isoform, mitochondrial	GLS	13.9873	14.7487	14.9359	14.6324	15.1512	15.9524	15.5114	15.2083	15.137	15.201
	0.269397	-0.309482	P00367;P49448	Glutamate dehydrogenase 1, mitochondrial;Glutamate dehydrogenase 2, mitochondrial	GLUD1;GLUD2	17.1476	16.5272	16.9065	15.6951	16.8317	18.1907	17.985	16.9784	16.532	17.275
	0.0627806	0.0988015	Q49A26	Putative oxidoreductase GLYR1	GLYR1	11.4977	12.5336	11.6015	10.7791	11.1664	10.8022	9.63711	12.1487	11.4072	11.9988
	1.57657	-1.05768	P17900	Ganglioside GM2 activator;Ganglioside GM2 activator isoform short	GM2A	10.0083	9.8687	9.3245	10.2323	11.0413	10.543	12.1025	11.1693	10.619	11.0187
	0.840825	-0.809283	P08754	Guanine nucleotide-binding protein G(k) subunit alpha	GNAI3	11.1707	11.0375	12.8351	13.0136	12.4254	13.1506	12.7429	13.5494	13.1906	12.8429
	0.829252	0.307685	P63244	Guanine nucleotide-binding protein subunit beta-2-like 1;Guanine nucleotide-binding protein subunit beta-2-like 1, N-terminally processed	GNB2L1	15.4262	15.701	16.0383	15.2007	15.1646	15.3194	15.0045	15.462	14.9989	15.2041
	0.855269	0.655378	Q9HAV0;P62879	Guanine nucleotide-binding protein subunit beta-4;Guanine nucleotide-binding protein G(I)/G(S)/G(T) subunit beta-2	GNB4;GNB2	11.5751	11.1559	11.7579	11.4741	11.9948	11.5057	12.2932	10.3598	10.782	10.2524
	1.03385	1.17547	Q9Y223	Bifunctional UDP-N-acetylglucosamine 2-epimerase/N-acetylmannosamine kinase;UDP-N-acetylglucosamine 2-epimerase (hydrolyzing);N-acetylmannosamine kinase	GNE	13.3443	13.3382	11.2908	13.3496	13.3949	13.3319	10.9955	13.4761	11.4635	11.3961
	0.910655	1.46182	Q96EK6	Glucosamine 6-phosphate N-acetyltransferase	GNPNAT1	13.0606	13.3596	10.7677	11.3604	12.6533	10.9988	9.46294	12.0108	11.8403	8.97241
	0.4299	-0.417319	Q08379	Golgin subfamily A member 2	GOLGA2	10.7016	11.5867	10.559	11.3242	11.5916	10.8844	12.7858	10.5066	11.5632	11.2453
	0.171393	0.432397	Q9Y3E0	Vesicle transport protein GOT1B	GOLT1B	9.51855	14.3485	11.2085	11.5293	8.99464	10.2043	10.1488	10.3602	10.578	11.0527
	1.1073	-0.461878	P00505	Aspartate aminotransferase, mitochondrial	GOT2	18.5811	18.2552	18.4798	18.0335	18.3007	18.8852	19.5348	18.651	18.636	18.7161
	0.040343	-0.0733534	P43304	Glycerol-3-phosphate dehydrogenase, mitochondrial	GPD2	11.1378	13.114	12.0604	11.7865	10.6676	13.827	12.4111	12.6142	12.1794	11.4844
	1.25207	2.86369	P06744	Glucose-6-phosphate isomerase	GPI	17.4849	17.5149	17.5299	17.3473	17.4124	16.6364	16.3407	14.9302	16.7735	9.78462
	0.157483	0.381145	Q92917	G patch domain and KOW motifs-containing protein	GPKOW	10.073	10.8313	10.4392	13.2397	13.448	12.8649	10.0155	11.451	13.205	11.068
	0.874105	-1.2228	Q8NFJ5	Retinoic acid-induced protein 3	GPRC5A	10.4854	10.8708	9.41391	10.5915	12.9018	11.644	13.713	12.1169	11.3709	11.6287
	0.24404	0.394649	Q13098	COP9 signalosome complex subunit 1	GPS1	12.9669	11.1899	9.69996	11.1732	12.9406	11.4094	11.5539	11.1209	10.4225	11.5774
	0.506676	-0.475299	Q14451	Growth factor receptor-bound protein 7	GRB7	11.4617	10.2961	9.78196	10.3125	10.4771	10.8426	10.5338	12.1935	10.336	10.9525
	1.39422	1.50497	Q9UBQ7	Glyoxylate reductase/hydroxypyruvate reductase	GRHPR	14.086	12.9046	13.1862	13.1634	13.4726	13.3149	9.71289	12.3144	13.0639	12.3074
	1.1621	-1.35934	Q13224;Q14957;Q12879	Glutamate receptor ionotropic, NMDA 2B;Glutamate receptor ionotropic, NMDA 2C;Glutamate receptor ionotropic, NMDA 2A	GRIN2B;GRIN2C;GRIN2A	11.7729	11.3769	11.499	11.0302	10.3411	11.8431	14.6301	11.5159	11.5655	12.9681
	0.487527	1.39568	Q9HAV7	GrpE protein homolog 1, mitochondrial	GRPEL1	14.6468	14.7453	14.6811	10.9478	14.2169	16.3798	15.716	10.7498	10.9018	14.1282
	0.174305	0.592991	Q12849	G-rich sequence factor 1	GRSF1	13.6695	13.6498	13.1038	10.9123	9.81873	14.585	14.1031	14.1231	10.0139	9.88068
	0.162004	-0.482467	Q9Y2Q3	Glutathione S-transferase kappa 1	GSTK1	13.0091	10.8306	10.4705	9.77069	11.2886	14.3849	14.1154	9.93741	11.1711	13.2088
	0.0451316	0.0909512	P21266	Glutathione S-transferase Mu 3	GSTM3	12.4701	11.068	10.2725	9.80726	11.7466	12.2559	9.65042	12.367	11.5378	11.1613
	0.549642	0.640457	P78417	Glutathione S-transferase omega-1	GSTO1	10.0987	12.9019	10.5883	12.1863	11.0663	10.9217	10.2518	10.4218	10.9123	11.0278
	1.42432	-1.11668	P52657	Transcription initiation factor IIA subunit 2	GTF2A2	9.25876	10.3344	11.2573	11.2918	11.1957	10.377	11.03	11.9806	12.0687	11.864
	1.05084	1.18791	Q00403	Transcription initiation factor IIB	GTF2B	12.493	12.7887	12.2033	12.2248	9.79023	11.5693	10.3207	10.5614	11.6263	10.1195
	0.0943511	0.171146	P29083	General transcription factor IIE subunit 1	GTF2E1	11.9866	11.5733	9.74095	10.9805	9.46728	11.8587	9.51282	11.0022	11.7834	10.7551
	1.58564	0.922114	P29084	Transcription initiation factor IIE subunit beta	GTF2E2	10.967	11.245	10.8305	10.964	11.0921	11.983	9.34463	10.2531	10.9016	10.5332
	0.480206	0.554633	P35269	General transcription factor IIF subunit 1	GTF2F1	11.9228	9.70679	12.2526	10.9537	12.2913	11.9359	11.4824	10.9565	10.5841	10.8006
	0.179456	0.438328	P13984	General transcription factor IIF subunit 2	GTF2F2	9.37865	11.8623	13.7141	10.4561	13.6253	10.3055	11.1895	11.9137	10.3014	11.07
	0.684587	1.31485	Q12789	General transcription factor 3C polypeptide 1	GTF3C1	13.7692	11.1751	14.2944	10.6333	13.3592	10.1889	10.3161	11.4961	11.6972	10.178
	0.100972	-0.104859	Q9Y5Q9	General transcription factor 3C polypeptide 3	GTF3C3	10.4519	9.87821	11.1826	10.9606	10.6146	11.5179	10.8142	11.271	10.0138	11.3908
	0.0568852	-0.114725	Q9Y5Q8	General transcription factor 3C polypeptide 5	GTF3C5	10.4231	10.9876	11.7832	11.5148	9.50198	9.97224	11.6803	11.3623	11.5005	8.70446
	0.00118923	0.00234222	A4D1E9	GTP-binding protein 10	GTPBP10	11.8845	11.222	12.3814	11.4594	9.65265	11.861	13.1041	11.0608	10.6359	10.8304
	0.452114	-1.21927	Q969Y2	tRNA modification GTPase GTPBP3, mitochondrial	GTPBP3	13.4351	11.4624	13.6497	10.4564	12.8379	16.4899	16.0937	13.8998	12.2788	14.8258
	0.487661	0.908158	Q9BZE4	Nucleolar GTP-binding protein 1	GTPBP4	13.205	10.0486	11.0782	11.5191	13.4562	13.1327	12.995	10.8693	10.6195	10.1768
	0.0825132	0.126395	Q9NYZ3	G2 and S phase-expressed protein 1	GTSE1	9.55322	11.237	11.4282	11.4889	10.2155	10.1456	9.56793	10.6042	11.8275	10.2071
	0.184392	0.319827	P07305	Histone H1.0;Histone H1.0, N-terminally processed	H1F0	15.0144	14.9271	14.5892	13.0215	14.1748	14.4855	13.8275	14.3412	15.7864	12.2405
	0.042141	-0.0499646	Q92522	Histone H1x	H1FX	17.5003	17.8168	17.8298	16.4037	16.4131	16.3711	16.9937	16.7794	17.7922	16.8578
	0.570016	-0.361132	Q71UI9;P0C0S5	Histone H2A.V;Histone H2A.Z	H2AFV;H2AFZ	15.6022	16.0449	16.039	15.1082	15.8856	16.4502	15.7178	16.252	16.0158	16.879
	1.05694	1.36925	P16104	Histone H2AX	H2AFX	18.9317	19.1488	19.035	18.6762	18.0204	17.8285	15.7306	16.0496	19.1631	18.0068
	0.164687	-0.159054	O75367	Core histone macro-H2A.1	H2AFY	18.8059	19.008	18.9726	18.2065	18.076	18.1244	17.78	18.7433	19.6474	18.5945
	1.34589	2.37563	P84243	Histone H3.3	H3F3A	16.0408	15.9453	14.1011	14.5937	14.8923	13.9921	10.2295	13.6209	15.1772	11.1801
	0.501211	0.784059	Q9P035	Very-long-chain (3R)-3-hydroxyacyl-CoA dehydratase 3	HACD3	13.0062	13.4445	12.3713	11.1056	13.4082	10.7362	11.1093	10.9872	13.1526	10.9961
	0.0365038	-0.0437393	Q16836	Hydroxyacyl-coenzyme A dehydrogenase, mitochondrial	HADH	16.8143	16.6583	16.3441	15.7829	16.2454	17.9334	17.0824	16.3094	16.2122	17.0899
	0.185474	-0.231744	P40939	Trifunctional enzyme subunit alpha, mitochondrial;Long-chain enoyl-CoA hydratase;Long chain 3-hydroxyacyl-CoA dehydrogenase	HADHA	18.9502	18.6469	18.5503	18.0494	18.5022	19.9	19.8062	19.1431	17.6216	19.4221
	0.129671	-0.138992	P55084	Trifunctional enzyme subunit beta, mitochondrial;3-ketoacyl-CoA thiolase	HADHB	17.2753	16.8315	16.9905	16.4667	17.1099	18.3953	17.7713	17.3275	16.4858	17.6841
	0.273172	-1.24681	P42357	Histidine ammonia-lyase	HAL	10.2654	15.4864	15.6992	11.3679	8.22106	11.1789	15.2557	16.0282	12.2702	9.57901
	0.159471	-0.44229	P49590	Probable histidine--tRNA ligase, mitochondrial	HARS2	15.2364	11.2831	15.4322	12.2452	10.8397	14.584	13.9089	13.5695	12.935	14.4361
	0.0806547	-0.258779	P69905	Hemoglobin subunit alpha	HBA1	10.3017	12.0768	15.2754	11.3409	10.3883	12.1951	13.632	9.65245	12.2263	13.2432
	1.44856	2.05885	P68871;P02042	Hemoglobin subunit beta;LVV-hemorphin-7;Spinorphin;Hemoglobin subunit delta	HBB;HBD	12.7544	14.6944	14.1518	11.8278	11.9966	11.3253	10.6093	11.5929	11.4978	9.23139
	1.13425	2.0089	Q13547	Histone deacetylase 1	HDAC1	13.9019	13.1442	13.3288	13.3386	14.2247	10.491	9.18245	10.0225	13.0542	11.9913
	1.40243	1.47463	Q9H583	HEAT repeat-containing protein 1;HEAT repeat-containing protein 1, N-terminally processed	HEATR1	13.4511	13.985	10.9791	11.6824	13.3742	13.0617	11.1857	11.6095	11.1512	11.1773
	0.0264453	-0.0545282	Q7Z4Q2	HEAT repeat-containing protein 3	HEATR3	10.0857	12.5573	11.8164	12.6265	9.73931	9.7549	11.3002	11.1153	11.2899	10.8995
	0.0689463	-0.200562	P31937	3-hydroxyisobutyrate dehydrogenase, mitochondrial	HIBADH	11.8366	10.5747	13.7063	10.7434	12.919	14.1016	14.6299	12.0346	13.0893	10.3028
	0.384075	-1.11239	Q6NVY1	3-hydroxyisobutyryl-CoA hydrolase, mitochondrial	HIBCH	14.3735	10.3412	10.4969	10.1078	13.582	14.8997	13.7778	14.4827	11.1208	14.2691
	0.789343	0.951896	P49773	Histidine triad nucleotide-binding protein 1	HINT1	11.7374	11.1259	11.305	10.887	11.8684	13.9434	11.0071	10.9993	11.4669	9.96388
	0.261645	-0.373985	Q9BX68	Histidine triad nucleotide-binding protein 2, mitochondrial	HINT2	15.4257	15.2133	15.2463	15.0044	14.2915	17.1325	16.5075	15.418	14.6608	16.4521
	0.858951	-0.614904	P16401	Histone H1.5	HIST1H1B	15.487	16.4368	15.5957	15.0209	14.6653	14.4796	16.02	15.7307	16.1029	15.7296
	1.37176	-0.721786	P16403;P16402	Histone H1.2;Histone H1.3	HIST1H1C;HIST1H1D	21.0439	21.7679	21.3599	20.656	20.524	20.5286	21.3594	21.8169	22.1894	21.4416
	1.17975	-1.21316	P10412	Histone H1.4	HIST1H1E	15.7432	15.8334	15.4368	14.761	15.3462	13.8483	15.8514	17.6188	16.845	15.1834
	0.00226516	0.00278028	Q93077	Histone H2A type 1-C	HIST1H2AC	23.0789	23.6966	22.7307	23.4914	22.542	22.553	22.0443	22.9802	24.073	22.9531
	0.00743446	0.0131572	Q93079;Q5QNW6	Histone H2B type 1-H;Histone H2B type 2-F	HIST1H2BH;HIST2H2BF	20.0695	20.4087	19.9459	20.8749	19.8338	18.8395	19.2322	19.1205	21.7835	19.7928
	0.0462874	0.0611682	P23527	Histone H2B type 1-O	HIST1H2BO	23.1639	23.4298	23.0199	23.5721	22.7917	22.0021	22.7608	22.461	24.2926	22.2273
	0.429483	1.15615	P68431;Q16695	Histone H3.1;Histone H3.1t	HIST1H3A;HIST3H3	18.3131	17.9833	17.2021	17.0573	15.9468	13.0821	13.0617	15.8311	17.5936	15.2789
	0.0351266	-0.0465234	P62805	Histone H4	HIST1H4A	23.3248	23.8243	23.548	24.2487	23.1848	22.5744	23.037	23.0138	24.8554	23.0833
	0.613756	-0.941157	Q16777;Q6FI13	Histone H2A type 2-C;Histone H2A type 2-A	HIST2H2AC;HIST2H2AA3	17.249	17.9105	15.5723	18.7452	15.1108	17.7611	18.4927	17.5693	17.6615	18.2738
	0.00993438	-0.0144277	Q6DRA6;Q6DN03	Putative histone H2B type 2-D;Putative histone H2B type 2-C	HIST2H2BD;HIST2H2BC	15.3354	15.5306	14.5913	13.8259	14.4629	14.9771	13.476	15.0541	15.7374	14.9391
	0.489643	0.546478	Q71DI3	Histone H3.2	HIST2H3A	21.7275	21.5316	21.1531	21.3861	21.1265	20.0653	20.2817	20.3368	22.1715	19.6841
	0.474382	-0.131642	Q5TEC6	Histone H3	HIST2H3PS2	17.7744	17.9165	17.9816	17.7345	17.7448	17.6246	17.8216	17.6305	18.2885	17.9702
	0.772415	-0.526921	Q7L7L0;P04908	Histone H2A type 3;Histone H2A type 1-B/E	HIST3H2A;HIST1H2AB	10.1865	10.1952	11.5835	10.3319	11.2726	10.7151	11.4728	10.7309	11.709	11.0514
	1.13632	0.871155	P52789	Hexokinase-2	HK2	16.3634	14.6598	14.3507	14.3908	14.7295	15.2773	14.3584	13.6282	13.8629	14.5134
	0.500368	0.566604	P04439;P17693;P13747;P01893;P01889	HLA class I histocompatibility antigen, A-3 alpha chain;HLA class I histocompatibility antigen, alpha chain G;HLA class I histocompatibility antigen, alpha chain E;Putative HLA class I histocompatibility antigen, alpha chain H;HLA class I histocompatibility antigen, B-7 alpha chain	HLA-A;HLA-G;HLA-E;HLA-H;HLA-B	12.4368	11.3347	12.2712	10.949	10.9065	12.2452	11.9669	11.9716	10.1447	10.4127
	0.355285	0.560751	P17096	High mobility group protein HMG-I/HMG-Y	HMGA1	10.7247	11.2068	10.8049	13.1565	13.3339	10.8418	10.7009	11.9923	11.4511	10.325
	1.27527	2.36488	O15347	High mobility group protein B3	HMGB3	15.2323	10.7095	13.6259	14.8683	14.1933	11.1925	9.72899	11.1768	10.8618	11.9874
	0.441574	0.592485	P35914	Hydroxymethylglutaryl-CoA lyase, mitochondrial	HMGCL	15.4481	14.5211	14.1343	14.078	14.4295	15.0582	15.4582	13.2802	12.467	14.8708
	0.018648	-0.0250039	P05204;Q15651	Non-histone chromosomal protein HMG-17;High mobility group nucleosome-binding domain-containing protein 3	HMGN2;HMGN3	10.235	11.8619	10.6134	11.4945	9.76608	11.0114	11.4715	10.8044	10.1006	11.045
	0.104691	0.307015	P82970	High mobility group nucleosome-binding domain-containing protein 5	HMGN5	9.29608	11.3779	12.0595	13.8832	9.86344	11.4423	9.91549	9.97017	13.6604	10.5075
	1.5605	0.685884	P09651;A0A2R8Y4L2	Heterogeneous nuclear ribonucleoprotein A1;Heterogeneous nuclear ribonucleoprotein A1, N-terminally processed	HNRNPA1	19.2315	19.2541	19.1687	18.5178	19.3299	18.7299	17.8297	18.2179	18.9886	18.3749
	1.58746	0.775201	P22626	Heterogeneous nuclear ribonucleoproteins A2/B1	HNRNPA2B1	20.1209	19.8156	19.7815	19.173	20.1602	19.564	18.5196	18.5993	19.6667	19.1904
	1.33644	2.19699	P51991	Heterogeneous nuclear ribonucleoprotein A3	HNRNPA3	14.0985	14.2808	13.2786	10.4382	14.4807	14.875	9.84468	11.6798	11.6394	12.3494
	1.23998	0.8468	P07910	Heterogeneous nuclear ribonucleoproteins C1/C2	HNRNPC	20.1168	20.0721	20.1345	20.3784	20.3703	19.6366	18.3889	19.0839	20.5316	19.0809
	1.06482	-1.60286	O60812;A0A0G2JPF8;P0DMR1;B7ZW38;A0A0G2JNQ3;B2RXH8	Heterogeneous nuclear ribonucleoprotein C-like 1;Heterogeneous nuclear ribonucleoprotein C-like 4;Heterogeneous nuclear ribonucleoprotein C-like 3;Heterogeneous nuclear ribonucleoprotein C-like 2	HNRNPCL1;HNRNPCL4;HNRNPCL3;HNRNPCL2	9.67219	10.1712	11.3765	11.6983	10.3388	9.85504	10.2175	12.1264	11.6532	14.4891
	0.74606	1.58882	O14979	Heterogeneous nuclear ribonucleoprotein D-like	HNRNPDL	14.2578	14.2386	14.2761	13.5115	15.6025	10.8006	10.4241	13.4015	14.0037	10.9401
	1.35993	0.986992	P52597	Heterogeneous nuclear ribonucleoprotein F;Heterogeneous nuclear ribonucleoprotein F, N-terminally processed	HNRNPF	16.8195	16.2998	15.9321	15.6493	16.2526	16.3052	13.9342	15.7886	15.9326	15.2356
	1.77444	0.834888	P31943	Heterogeneous nuclear ribonucleoprotein H;Heterogeneous nuclear ribonucleoprotein H, N-terminally processed	HNRNPH1	17.7222	17.6198	17.6018	17.3331	18.0762	17.4632	16.0711	16.6549	17.5667	16.9119
	0.17813	-0.305813	P55795	Heterogeneous nuclear ribonucleoprotein H2	HNRNPH2	11.8714	10.6088	10.5099	9.45002	11.5559	10.5766	10.1221	10.3144	12.965	10.8701
	0.852279	0.470736	P31942	Heterogeneous nuclear ribonucleoprotein H3	HNRNPH3	16.0467	16.2206	16.1735	15.6823	16.1985	16.0454	14.6413	15.6104	16.2226	15.8875
	1.03683	0.638833	P61978	Heterogeneous nuclear ribonucleoprotein K	HNRNPK	20.6988	20.5087	20.5129	20.4161	20.4779	20.0324	19.1546	19.5424	20.9608	19.5513
	0.394173	-0.632981	Q8WVV9	Heterogeneous nuclear ribonucleoprotein L-like	HNRNPLL	9.49776	10.5685	11.727	12.8753	11.0293	10.557	10.3723	11.9923	11.4872	12.8501
	1.27153	1.18425	P52272	Heterogeneous nuclear ribonucleoprotein M	HNRNPM	18.041	18.079	18.0268	17.7477	18.0822	17.8668	15.1269	16.9214	18.3342	16.7762
	0.832693	0.452308	O43390	Heterogeneous nuclear ribonucleoprotein R	HNRNPR	18.1816	17.918	18.0418	17.0493	18.1482	17.9873	16.8332	17.3819	17.9233	17.6032
	1.17375	0.740287	Q00839	Heterogeneous nuclear ribonucleoprotein U	HNRNPU	20.627	20.4735	20.542	20.3869	20.9441	20.0046	18.9175	19.6236	20.8244	19.6586
	0.924196	1.15609	Q9BUJ2	Heterogeneous nuclear ribonucleoprotein U-like protein 1	HNRNPUL1	13.4598	13.0144	13.005	11.9203	13.9294	10.8532	12.7787	11.0374	10.9871	11.3604
	1.57928	1.98955	Q1KMD3	Heterogeneous nuclear ribonucleoprotein U-like protein 2	HNRNPUL2	17.0819	16.3406	16.4578	16.668	17.3189	16.2875	13.0811	13.5461	16.9794	15.2051
	0.286093	0.611487	Q5SSJ5	Heterochromatin protein 1-binding protein 3	HP1BP3	17.7792	17.8501	17.9767	16.6521	16.7196	15.7553	13.7071	16.7403	18.2952	17.3001
	1.00984	-1.73683	Q96IR7	4-hydroxyphenylpyruvate dioxygenase-like protein	HPDL	9.24279	9.85822	11.4682	12.8954	11.0478	13.9619	12.6688	13.3176	13.6376	12.9728
	0.509423	-0.386157	Q99714	3-hydroxyacyl-CoA dehydrogenase type-2	HSD17B10	18.465	18.3729	18.4798	17.7805	18.0885	19.3404	19.4364	18.6756	18.0486	19.0688
	0.272907	-0.513057	Q8NBQ5	Estradiol 17-beta-dehydrogenase 11	HSD17B11	11.4454	10.9136	11.1949	11.1271	8.48204	10.0446	9.25022	12.2509	12.0029	10.6867
	0.142923	-0.18374	P51659	Peroxisomal multifunctional enzyme type 2;(3R)-hydroxyacyl-CoA dehydrogenase;Enoyl-CoA hydratase 2	HSD17B4	11.368	10.9371	10.6378	11.2785	12.1609	9.86648	10.2103	11.5149	11.1769	11.9987
	0.536057	-0.980131	Q92506	Estradiol 17-beta-dehydrogenase 8	HSD17B8	11.6516	10.8722	12.0445	10.6524	9.95619	12.8786	14.2316	12.3025	10.0673	12.6895
	0.223625	0.773683	Q6YN16	Hydroxysteroid dehydrogenase-like protein 2	HSDL2	14.7822	10.1999	11.3694	10.9728	13.7718	15.3347	15.2503	11.019	11.1039	10.4859
	1.7118	0.616124	P07900	Heat shock protein HSP 90-alpha	HSP90AA1	20.7915	20.3093	20.538	20.7168	21.3227	20.6498	19.912	20.0033	20.5618	19.9438
	0.449204	0.182678	P08238	Heat shock protein HSP 90-beta	HSP90AB1	19.3494	18.8363	19.1101	19.1945	19.8212	19.3516	19.009	18.8441	19.3068	19.2181
	1.52587	2.12172	Q58FF8	Putative heat shock protein HSP 90-beta 2	HSP90AB2P	14.3931	10.8429	11.098	13.5824	13.9472	13.74	11.0391	10.5532	11.2343	10.4222
	0.162969	0.336397	Q58FF6	Putative heat shock protein HSP 90-beta 4	HSP90AB4P	13.2594	11.6779	11.4953	11.7984	9.72385	10.1112	9.58371	11.1031	12.5017	10.8433
	0.0893605	0.121336	P14625	Endoplasmin	HSP90B1	15.8615	14.3436	15.9811	15.0927	15.9262	15.8688	14.183	15.9157	16.2948	15.1704
	0.846641	0.367272	P0DMV9;P0DMV8	Heat shock 70 kDa protein 1B;Heat shock 70 kDa protein 1A	HSPA1B;HSPA1A	20.0998	19.841	20.1478	20.2815	20.4401	20.4518	19.2	19.8964	20.3819	19.8939
	0.372421	0.525472	O95757	Heat shock 70 kDa protein 4L	HSPA4L	12.7128	10.3615	12.8813	12.4575	10.7786	12.0301	11.5362	10.8702	12.382	10.5909
	0.743841	-1.15202	P11021	78 kDa glucose-regulated protein	HSPA5	16.3469	13.152	16.6818	16.2681	16.7348	17.5311	16.9853	17.1799	17.6837	17.2356
	0.26317	0.195105	P17066;P48741	Heat shock 70 kDa protein 6;Putative heat shock 70 kDa protein 7	HSPA6;HSPA7	15.1342	15.3319	15.356	14.2961	15.4659	15.5641	15.3518	14.6875	14.4504	15.4954
	0.769419	0.254335	P11142	Heat shock cognate 71 kDa protein	HSPA8	19.6999	19.5053	19.9484	20.0132	20.0718	19.7377	19.5734	19.3518	20.0297	19.3452
	0.75372	-0.695076	P38646	Stress-70 protein, mitochondrial	HSPA9	21.2146	20.66	21.0971	20.7006	21.0211	22.6594	22.8776	21.6776	21.1915	21.9354
	0.235339	-0.198844	P04792	Heat shock protein beta-1	HSPB1	17.2107	17.414	18.2487	16.7503	17.4317	18.2368	17.2654	17.9937	17.5227	18.2083
	0.613499	1.08785	Q9NZL4	Hsp70-binding protein 1	HSPBP1	13.2629	11.7293	13.5634	10.5176	12.6606	10.6167	8.92026	11.7899	11.7606	11.4116
	0.567477	-0.38532	P10809	60 kDa heat shock protein, mitochondrial	HSPD1	21.7962	21.2897	21.5887	21.4597	21.6499	22.7032	22.8553	21.6366	22.0101	22.0309
	0.556211	-0.971542	P61604	10 kDa heat shock protein, mitochondrial	HSPE1	16.3435	13.5378	15.8308	16.085	16.429	18.3427	18.1354	16.7765	16.6375	16.716
	1.03575	0.99851	Q92598	Heat shock protein 105 kDa	HSPH1	13.0168	12.9242	12.5038	13.8887	13.6144	12.345	11.7787	11.8862	13.5332	11.0031
	0.58676	0.665783	O43719	HIV Tat-specific factor 1	HTATSF1	11.9398	10.2273	11.05	10.8996	11.8181	9.46293	9.88126	11.2152	9.83324	10.0056
	0.388968	0.440881	O60921	Checkpoint protein HUS1	HUS1	11.6503	11.762	11.0332	10.327	11.8852	9.97915	10.2579	10.1953	10.4276	11.7803
	0.102297	-0.249606	P41252	Isoleucine--tRNA ligase, cytoplasmic	IARS	13.3903	14.5263	14.648	13.1134	13.8162	10.9014	11.4574	14.2986	14.2504	14.589
	0.0813905	-0.121129	Q9NSE4	Isoleucine--tRNA ligase, mitochondrial	IARS2	17.9146	17.6153	17.4042	15.8523	17.2162	18.6991	18.2738	17.3981	16.765	17.8487
	0.452692	-0.436474	Q5T440	Putative transferase CAF17, mitochondrial	IBA57	10.5105	11.1794	10.3283	10.3852	10.6543	10.6928	12.3787	10.9011	11.1371	9.82939
	0.607045	0.683589	Q14197	Peptidyl-tRNA hydrolase ICT1, mitochondrial	ICT1	10.1898	12.0568	11.0589	12.011	10.7514	12.8578	10.1773	10.538	11.3154	11.1854
	0.468617	-0.817737	O75874	Isocitrate dehydrogenase [NADP] cytoplasmic	IDH1	10.5987	11.5237	8.51566	10.6405	9.94387	7.93729	10.3399	11.6167	11.3408	9.4134
	0.182729	-0.511487	P48735	Isocitrate dehydrogenase [NADP], mitochondrial	IDH2	14.7832	11.979	13.3622	10.7811	14.4029	14.9295	15.5047	13.3558	11.6176	15.06
	0.29456	-0.364906	P50213	Isocitrate dehydrogenase [NAD] subunit alpha, mitochondrial	IDH3A	16.6354	16.3302	16.0424	15.6071	16.1383	17.5263	17.4971	16.832	15.2679	17.3824
	0.19093	-0.444815	P51553	Isocitrate dehydrogenase [NAD] subunit gamma, mitochondrial	IDH3G	13.5194	10.3935	10.8725	11.6497	11.3209	13.3069	14.0925	10.488	13.2105	11.3634
	0.179768	0.377329	Q13907	Isopentenyl-diphosphate Delta-isomerase 1	IDI1	13.2607	13.0342	9.6962	11.5161	12.5271	10.759	11.7999	11.2336	10.0578	12.595
	0.185614	-0.836981	P01876	Ig alpha-1 chain C region	IGHA1	9.88644	11.7656	13.0893	11.1167	10.1939	17.298	17.1965	10.8521	12.242	11.9571
	0.280782	0.602811	P01857	Ig gamma-1 chain C region	IGHG1	11.1733	11.4838	14.6096	10.5493	10.3749	12.0564	9.83967	10.8094	12.5195	11.2517
	0.51129	-0.731366	P01834	Ig kappa chain C region	IGKC	10.4864	11.7849	12.8848	11.5524	10.2276	11.1629	13.7161	11.3029	12.0987	11.2071
	1.56781	1.12234	Q12905	Interleukin enhancer-binding factor 2	ILF2	17.9472	17.8806	17.8676	17.8985	17.881	17.1217	15.6167	16.1953	17.8662	16.8968
	1.42401	1.74877	Q12906	Interleukin enhancer-binding factor 3	ILF3	16.5821	16.2395	16.2975	16.1678	16.9063	16.2378	14.1419	12.5461	16.6474	15.2902
	0.603101	1.37929	Q16891	MICOS complex subunit MIC60	IMMT	12.7717	12.9173	12.6025	10.2032	14.5359	16.3755	12.7814	12.1493	10.7318	11.7578
	0.132168	-0.254316	P12268	Inosine-5-monophosphate dehydrogenase 2	IMPDH2	14.3337	13.5554	14.8965	16.8516	17.0496	14.671	15.3214	15.3118	15.991	15.2983
	0.608498	1.08066	Q9NQS7	Inner centromere protein	INCENP	12.728	9.8441	12.7306	12.6049	12.5841	11.4583	10.2088	10.8485	13.1412	9.44559
	0.452911	0.563863	Q8N201	Integrator complex subunit 1	INTS1	9.99379	12.0367	12.4088	10.6541	11.5154	11.8618	10.3204	10.9225	11.9948	10.1538
	0.117338	0.159454	Q9H0H0	Integrator complex subunit 2	INTS2	10.9268	10.6253	11.2194	10.3372	11.9289	9.84689	9.9228	10.0844	11.8964	10.7149
	1.50529	2.20203	Q68E01	Integrator complex subunit 3	INTS3	13.3957	13.3946	13.6065	13.2468	13.5621	9.78042	9.2778	11.1359	11.055	11.0473
	0.832584	-0.418283	Q96HW7	Integrator complex subunit 4	INTS4	9.51334	10.511	9.93917	9.96248	10.0315	10.4311	9.82862	10.6965	10.887	10.5201
	0.544755	-0.700322	Q9NVH2	Integrator complex subunit 7	INTS7	10.6145	9.48934	10.7657	12.6716	10.7352	11.9797	12.114	11.1678	11.4017	12.2884
	0.0227762	0.0172657	Q9NV88	Integrator complex subunit 9	INTS9	11.0137	10.5703	11.3313	10.9872	10.3392	10.4898	10.6646	11.3814	10.3252	10.7141
	0.814449	2.47355	Q8TEX9	Importin-4	IPO4	11.2959	12.7026	12.468	17.253	16.8188	9.94637	9.76916	10.843	12.1955	10.9546
	1.43196	2.65317	O95373	Importin-7	IPO7	15.8545	15.1565	15.1613	15.7588	15.5981	13.2925	10.4355	13.7292	15.2359	10.5344
	0.227849	0.337142	Q96P70	Importin-9	IPO9	12.1843	11.3421	10.1677	12.5002	12.202	10.0659	10.8241	11.8978	10.3867	11.1845
	0.504316	0.858789	P46940	Ras GTPase-activating-like protein IQGAP1	IQGAP1	14.886	12.9957	15.5772	14.2625	14.4471	15.0403	14.8058	11.3731	14.9822	13.5429
	0.436685	-0.625673	Q7Z5L9	Interferon regulatory factor 2-binding protein 2	IRF2BP2	11.9746	10.5413	11.8881	9.77935	10.0069	12.2301	12.9035	10.8819	11.6895	11.308
	0.957583	0.538444	Q96AB3	Isochorismatase domain-containing protein 2, mitochondrial	ISOC2	11.5472	11.4964	11.5647	11.2937	11.1895	11.824	11.5107	11.5801	10.4991	10.2001
	0.419893	-0.788576	P26440	Isovaleryl-CoA dehydrogenase, mitochondrial	IVD	12.077	11.5978	12.2131	11.8212	10.482	9.18781	13.647	12.9576	10.4922	10.9768
	0.0139173	-0.0308075	P17275	Transcription factor jun-B	JUNB	11.6941	11.0171	11.3682	12.7489	9.3758	9.93526	9.46473	11.4652	11.3999	11.8863
	0.759743	-1.81694	P14923	Junction plakoglobin	JUP	14.6879	16.3282	17.2376	15.3086	12.7208	17.4802	17.5836	18.9575	14.5172	18.7183
	0.0263281	0.0656549	Q15046	Lysine--tRNA ligase	KARS	14.1748	14.5165	14.0541	10.3745	14.2016	14.6649	13.2545	14.4069	13.0966	13.637
	1.50256	1.67114	O95251	Histone acetyltransferase KAT7	KAT7	12.8569	12.8987	12.7789	11.5069	11.6359	9.991	11.1931	10.3046	9.98407	9.61245
	1.69173	1.46526	Q8IYT4	Katanin p60 ATPase-containing subunit A-like 2	KATNAL2	11.3793	12.4574	12.9474	13.5356	12.9785	11.3666	11.173	10.7458	11.6435	10.3532
	0.575633	1.26474	Q9Y2K7	Lysine-specific demethylase 2A	KDM2A	12.4485	12.5872	10.5868	10.4752	15.1538	12.116	10.5468	10.5654	13.1403	9.60016
	0.935813	1.26123	Q9Y4C1	Lysine-specific demethylase 3A	KDM3A	11.0183	11.5883	11.2419	13.0258	9.63599	9.58781	9.4743	9.22309	9.54011	10.783
	1.05732	1.30094	Q7LBC6	Lysine-specific demethylase 3B	KDM3B	12.7346	12.8905	12.6273	11.5055	9.51311	11.603	10.6414	10.3568	10.0521	10.9953
	0.232344	-0.280393	P41229	Lysine-specific demethylase 5C	KDM5C	9.87222	10.6467	10.5684	11.8344	11.307	9.63611	11.2074	10.558	11.6694	10.2633
	0.477103	-0.532576	Q06136	3-ketodihydrosphingosine reductase	KDSR	10.0081	11.1396	11.1808	9.97141	9.29249	11.2366	10.3083	11.275	11.9582	10.4748
	0.388448	0.681384	Q07666	KH domain-containing, RNA-binding, signal transduction-associated protein 1	KHDRBS1	14.4917	14.0267	14.0278	15.1851	14.7489	14.583	14.1234	11.1468	15.5788	14.4677
	0.977797	0.587065	Q92945	Far upstream element-binding protein 2	KHSRP	16.843	16.8505	16.9144	17.0072	17.187	16.4123	16.0803	15.658	17.3587	16.031
	0.0479601	-0.0688399	Q15397	Pumilio domain-containing protein KIAA0020	KIAA0020	10.344	12.5007	11.052	10.9594	9.61387	10.4114	10.6305	11.0994	10.691	11.1088
	1.45119	2.70855	Q15004	PCNA-associated factor	KIAA0101	13.7868	9.84531	14.2183	15.5277	15.4494	13.4098	10.5711	10.8505	11.1136	11.4555
	0.313277	-0.531286	O15091	Mitochondrial ribonuclease P protein 3	KIAA0391	11.3781	11.4921	11.1608	11.9242	10.1807	13.2079	12.9793	10.3324	11.8271	13.2156
	0.702886	-0.597161	O95235	Kinesin-like protein KIF20A	KIF20A	10.6504	11.4411	10.1761	10.8983	11.0539	10.863	11.1101	12.0142	12.3576	10.2953
	0.148419	0.372655	Q14807	Kinesin-like protein KIF22	KIF22	14.4964	14.9235	14.9395	14.0779	14.4721	10.388	12.2735	13.2808	13.9348	14.5518
	0.180918	-0.255829	O00139	Kinesin-like protein KIF2A	KIF2A	12.657	10.0273	11.2289	11.6085	10.2812	10.6108	11.1653	11.9728	11.6627	10.4983
	1.2368	2.0144	Q99661	Kinesin-like protein KIF2C	KIF2C	13.7592	13.6005	13.6136	11.1837	13.4319	10.4099	9.23747	10.3653	12.3868	10.6186
	0.874327	-0.907836	P33176	Kinesin-1 heavy chain	KIF5B	10.904	10.7708	10.3654	11.5182	9.47063	10.6833	10.115	12.1168	11.3462	12.5282
	1.46949	1.59253	Q9BW19	Kinesin-like protein KIFC1	KIFC1	13.3957	11.3391	12.7688	13.1495	13.0112	10.6557	10.9433	11.0987	11.279	9.85548
	0.0566934	0.101732	Q6PF15	Kelch-like protein 35	KLHL35	11.4822	10.7329	8.87741	11.3194	10.6401	11.5665	9.43267	11.6276	11.2139	10.3978
	0.404399	0.901509	P52294	Importin subunit alpha-5;Importin subunit alpha-5, N-terminally processed	KPNA1	13.343	13.1295	13.3171	10.1144	12.5177	9.5456	9.61845	12.5191	11.5458	10.6889
	0.816836	1.0449	P52292	Importin subunit alpha-1	KPNA2	12.5775	10.2696	10.4004	13.2295	11.5009	12.8908	10.8178	11.0062	10.7842	10.4579
	0.200133	0.323853	O00629;O00505	Importin subunit alpha-3;Importin subunit alpha-4	KPNA4;KPNA3	12.1606	11.1798	12.3155	11.9174	10.4946	10.4594	11.5068	12.2011	11.3656	9.31598
	0.146471	0.19479	O60684	Importin subunit alpha-7	KPNA6	10.2341	10.8552	9.91613	10.9084	12.0421	10.7702	10.1705	9.5935	11.6152	10.9924
	2.12487	0.65531	Q14974	Importin subunit beta-1	KPNB1	16.7002	16.4484	16.3995	16.709	16.2629	16.3094	15.616	15.3703	16.0345	16.2442
	1.72528	-0.449109	P05783	Keratin, type I cytoskeletal 18	KRT18	18.6647	18.7986	19.0799	19.1518	19.1148	19.1666	19.2663	19.2711	19.8468	19.3965
	0.658272	-1.51998	P04259	Keratin, type II cytoskeletal 6B	KRT6B	10.5454	11.898	13.2959	10.9996	9.81464	13.8807	13.662	14.2226	10.3089	14.8426
	0.245027	0.982999	A6NCN2	Putative keratin-87 protein	KRT87P	10.424	10.3844	10.4401	9.68574	10.2375	17.9538	10.3975	11.4677	9.33837	10.9482
	0.0814018	0.252942	Q9H9P8	L-2-hydroxyglutarate dehydrogenase, mitochondrial	L2HGDH	16.1346	15.5734	15.8034	14.8215	13.9629	17.2543	17.181	16.1347	11.6924	16.3469
	0.142781	-0.202265	Q53H82	Beta-lactamase-like protein 2	LACTB2	11.9363	11.2822	9.85573	9.38247	10.4295	10.4708	10.1711	11.3751	11.3155	10.1854
	0.0346747	0.0688574	O43813	LanC-like protein 1	LANCL1	9.56233	10.6928	10.9251	12.4165	13.0628	10.601	11.7646	11.43	10.6531	10.7171
	0.00922228	0.0223678	P28838	Cytosol aminopeptidase	LAP3	13.0473	10.3423	10.3145	11.0766	10.7013	13.294	13.0585	10.7789	11.3686	10.5553
	0.676379	-1.09048	Q9P2J5	Leucine--tRNA ligase, cytoplasmic	LARS	10.8113	11.8429	13.3394	11.366	10.1669	13.4481	12.9928	13.3062	11.434	13.9454
	0.179986	-0.580667	Q15031	Probable leucine--tRNA ligase, mitochondrial	LARS2	15.4167	12.4809	14.0476	11.7178	14.3844	16.7863	15.8183	15.487	11.5155	16.0577
	0.0498354	0.105782	Q9Y4W2	Ribosomal biogenesis protein LAS1L	LAS1L	12.5955	9.85644	10.5825	9.47493	12.513	10.9435	11.3818	11.6692	10.7729	9.73023
	0.0152923	-0.0205321	Q14847	LIM and SH3 domain protein 1	LASP1	9.89097	9.8058	10.9281	11.0917	10.4807	11.9063	9.99195	11.2953	10.6762	10.8544
	0.923078	-1.48385	Q14739	Lamin-B receptor	LBR	13.4921	10.3647	13.1282	10.8447	13.6815	10.3315	13.3608	13.1327	14.2095	13.1274
	0.533669	1.44468	P31025	Lipocalin-1	LCN1	10.2092	11.4321	14.1822	10.6704	16.407	10.8933	11.6352	10.4902	11.1862	10.1059
	1.13166	2.06916	P07195	L-lactate dehydrogenase B chain	LDHB	17.0273	17.0398	17.3151	17.5209	17.3854	16.7342	16.44	14.9614	17.3746	11.6294
	0.429085	-0.709324	O95202	LETM1 and EF-hand domain-containing protein 1, mitochondrial	LETM1	10.2571	13.0919	12.0933	9.89127	11.0038	13.2554	11.7752	12.6483	12.1689	12.64
	1.09163	2.00576	P17931	Galectin-3	LGALS3	15.7181	16.4486	15.7188	16.2651	16.1264	16.164	15.2179	10.4434	16.148	14.4617
	0.00681575	0.0136123	P47929	Galectin-7	LGALS7	12.1365	10.7311	13.0608	11.5878	10.5639	11.2529	12.6337	11.3297	9.92058	12.2836
	0.10689	0.352549	P49257	Protein ERGIC-53	LMAN1	14.031	9.25874	10.591	11.9239	14.0244	14.064	14.2687	10.5723	11.3893	11.6215
	0.469112	-0.479825	P02545	Prelamin-A/C;Lamin-A/C	LMNA	18.8031	18.936	19.0842	18.2032	18.7085	18.9502	18.5453	18.5189	20.9051	19.0735
	0.42198	-0.578407	P20700	Lamin-B1	LMNB1	17.2748	17.1818	17.1996	16.1465	16.684	16.7946	16.3895	16.7486	19.6186	17.0778
	0.656945	-1.5775	Q03252	Lamin-B2	LMNB2	9.71082	9.35707	10.1352	10.0587	9.77043	10.7905	10.5638	10.2112	15.9012	9.51559
	0.405579	-0.573367	Q8WWI1	LIM domain only protein 7	LMO7	10.156	11.7103	10.9281	12.5926	12.9958	12.3273	13.1827	11.2676	12.6227	12.3606
	0.841325	-0.559886	P36776	Lon protease homolog, mitochondrial	LONP1	18.5375	18.3646	18.3435	17.6332	18.1073	19.2165	19.3277	18.9969	18.116	19.2672
	0.39916	-0.327272	P42704	Leucine-rich PPR motif-containing protein, mitochondrial	LRPPRC	20.4529	20.6455	20.3923	19.5563	20.0862	21.2513	20.9516	21.0199	19.865	21.0622
	0.167799	-0.245036	Q15345	Leucine-rich repeat-containing protein 41	LRRC41	9.96663	12.3109	11.7408	9.95716	10.56	10.6916	10.6124	10.7685	12.2226	10.8614
	1.02629	1.06214	Q96AG4	Leucine-rich repeat-containing protein 59	LRRC59	14.261	13.8765	13.9741	12.4064	12.8792	13.2452	12.3292	10.8827	13.105	13.1961
	1.18832	1.44304	Q9UFC0	Leucine-rich repeat and WD repeat-containing protein 1	LRWD1	13.4415	10.354	13.4755	12.9925	13.3444	12.4606	10.8183	11.6272	12.0204	10.4742
	0.0181172	-0.0846722	P02788	Lactotransferrin;Lactoferricin-H;Kaliocin-1;Lactoferroxin-A;Lactoferroxin-B;Lactoferroxin-C	LTF	10.1298	12.3024	10.0726	10.4577	9.94175	12.2032	16.5519	9.3242	9.66626	8.20134
	0.406272	0.856015	Q9Y383	Putative RNA-binding protein Luc7-like 2	LUC7L2	10.8709	12.232	12.6983	10.0367	13.3603	13.0656	9.09374	13.1984	10.9659	11.4939
	0.43112	0.372798	O95232	Luc7-like protein 3	LUC7L3	11.6104	10.0971	11.2457	11.7686	11.8946	11.7136	11.0556	10.3893	11.5878	11.0294
	0.870566	1.12578	Q9NX58	Cell growth-regulating nucleolar protein	LYAR	12.7556	12.8106	11.5462	10.2537	11.1518	13.83	11.0032	10.5837	11.2872	10.8546
	0.714235	-1.10174	Q5U5X0	Complex III assembly factor LYRM7	LYRM7	9.7453	10.2046	11.9076	10.5256	11.3516	13.201	13.01	12.747	10.6655	12.6082
	0.186252	-0.522364	P61626	Lysozyme C	LYZ	9.75973	12.9442	12.3334	10.4938	9.68767	13.6167	14.335	10.2154	11.2749	12.1543
	0.434192	-1.25592	Q9UPN3	Microtubule-actin cross-linking factor 1, isoforms 1/2/3/5	MACF1	14.7419	15.0001	10.2898	14.491	11.1142	10.8193	14.6847	11.4434	14.9735	14.893
	0.0641417	-0.0694526	Q9BQ69	O-acetyl-ADP-ribose deacetylase MACROD1	MACROD1	17.4572	17.3627	17.3594	16.307	16.5673	18.0263	17.7835	17.17	16.5159	17.5284
	0.689499	0.745575	O15525;O60675	Transcription factor MafG;Transcription factor MafK	MAFG;MAFK	11.3599	11.5242	12.0819	10.655	12.7118	12.2822	11.6455	11.9658	10.6742	9.80894
	0.0092808	-0.0184851	Q9UNF1	Melanoma-associated antigen D2	MAGED2	11.4579	10.3527	11.8449	11.2088	8.85513	9.52158	9.80209	10.9883	11.4507	9.99355
	1.17275	0.959971	Q96A72;P61326	Protein mago nashi homolog 2;Protein mago nashi homolog	MAGOHB;MAGOH	12.7705	11.9975	12.3387	11.6592	13.0471	10.8061	11.0404	11.7425	10.5997	11.1902
	1.10256	-1.12825	P27816	Microtubule-associated protein 4	MAP4	11.3472	8.67867	11.4511	10.8025	11.308	11.3275	12.1279	12.275	11.6308	11.7559
	0.403069	0.481697	Q15691	Microtubule-associated protein RP/EB family member 1	MAPRE1	9.72254	11.6804	11.3833	12.5598	11.0781	10.3768	10.0349	10.6991	11.0223	10.851
	0.174151	-0.428823	P56192	Methionine--tRNA ligase, cytoplasmic	MARS	13.1373	9.87578	13.4215	10.6922	12.8155	13.2779	10.8777	13.9552	13.7139	11.982
	1.58499	1.49442	P43243	Matrin-3	MATR3	16.9668	16.728	16.6023	16.3182	16.8269	16.6017	13.6584	14.7175	16.8877	15.4546
	0.14544	0.165582	Q9Y6X3	MAU2 chromatid cohesion factor homolog	MAU2	12.7726	10.7212	11.0199	10.6851	11.631	11.1702	10.6598	11.7567	11.142	11.1125
	0.269585	0.48324	Q9UBB5	Methyl-CpG-binding domain protein 2	MBD2	13.1015	10.7811	11.3995	13.3103	12.9615	10.5401	10.0831	12.2469	12.1185	11.6812
	0.00860767	-0.0196319	O95983	Methyl-CpG-binding domain protein 3	MBD3	12.7098	10.7553	10.0581	12.4044	9.43747	10.176	10.0992	10.2058	11.9002	11.5674
	0.244192	-0.267543	Q96N66	Lysophospholipid acyltransferase 7	MBOAT7	10.9507	11.5961	11.9466	10.5474	10.598	10.4049	11.5382	11.5124	10.1051	11.9437
	1.50783	-1.7173	Q9HCC0	Methylcrotonoyl-CoA carboxylase beta chain, mitochondrial	MCCC2	17.8218	17.5571	17.0149	15.6189	16.7134	18.4334	19.8937	19.2509	17.3718	19.1258
	0.443005	0.478528	Q7L590	Protein MCM10 homolog	MCM10	10.2333	10.3871	10.4642	11.5954	12.3251	10.6425	9.98817	9.84591	11.0631	10.9538
	0.000367608	-0.00133975	Q8NE86	Calcium uniporter protein, mitochondrial	MCU	10.6296	11.2918	14.3285	11.8643	14.2914	14.6639	14.9153	10.136	12.4321	13.9016
	1.60086	2.21293	Q14676	Mediator of DNA damage checkpoint protein 1	MDC1	13.3467	13.1676	13.7048	13.7742	13.5491	12.561	9.53565	10.2336	13.9576	10.8237
	0.373637	-0.250627	P40926	Malate dehydrogenase, mitochondrial	MDH2	18.7949	18.6429	18.6037	18.1291	18.4751	19.2838	19.7108	18.674	18.3968	18.8406
	1.36339	-2.14599	P23368	NAD-dependent malic enzyme, mitochondrial	ME2	10.1449	10.1497	11.6324	12.3793	9.40468	13.9659	14.1631	13.0975	13.2962	13.1451
	0.555111	0.791121	O60244	Mediator of RNA polymerase II transcription subunit 14	MED14	11.1462	10.6357	11.6459	11.7133	11.0724	10.1206	8.95107	10.6364	12.2757	9.19503
	0.0734585	-0.100942	Q96HR3	Mediator of RNA polymerase II transcription subunit 30	MED30	9.83304	11.6234	11.8172	10.729	10.204	10.6515	10.0663	11.3648	11.7116	10.4998
	0.158012	-0.159204	O00255	Menin	MEN1	11.4432	11.3649	11.1396	9.93415	11.9347	10.8883	11.5241	11.7441	10.6735	11.165
	0.350878	0.377258	A6NJ78	Probable methyltransferase-like protein 15	METTL15	11.0263	11.5154	11.7203	11.849	10.6667	10.6205	10.5386	11.3811	11.8508	9.65256
	0.415004	0.635834	Q9H7H0	Methyltransferase-like protein 17, mitochondrial	METTL17	11.2853	12.881	9.49396	10.1225	11.9795	11.8726	10.6344	11.0093	11.1708	9.73205
	0.177292	-0.175073	Q86U44	N6-adenosine-methyltransferase 70 kDa subunit	METTL3	11.0003	11.6286	10.2006	10.6494	9.62506	10.273	11.2398	10.5247	10.3282	10.8588
	0.0638594	0.0695168	Q9BQP7	Mitochondrial genome maintenance exonuclease 1	MGME1	10.5985	11.0421	10.2024	11.7049	11.4549	10.9005	11.8103	10.2296	11.0617	10.5558
	0.893866	0.693436	P16455	Methylated-DNA--protein-cysteine methyltransferase	MGMT	12.2095	10.6608	12.3297	11.94	12.3025	10.8386	11.1771	10.5559	11.0951	11.2523
	1.28776	1.38638	O14880	Microsomal glutathione S-transferase 3	MGST3	14.7199	14.9556	14.2967	13.1771	13.199	12.9433	13.1611	12.0213	13.5183	11.2814
	0.00389983	-0.0175142	Q9NPA3	Mid1-interacting protein 1	MID1IP1	15.0094	12.9378	13.5053	12.6648	14.4671	17.1591	10.7012	17.3557	12.6179	16.5576
	1.70235	1.00269	P14174	Macrophage migration inhibitory factor	MIF	17.594	17.584	17.5987	17.8045	17.6686	17.1175	15.4674	16.6484	17.4605	16.6579
	1.35581	2.23632	P46013	Antigen KI-67	MKI67	17.4691	17.5801	17.5406	16.5965	17.1517	15.8256	13.0918	14.2606	18.0023	13.809
	0.782787	1.21931	P40692	DNA mismatch repair protein Mlh1	MLH1	12.6131	11.1457	12.5137	13.3493	13.0942	9.97362	9.28161	11.3613	11.069	11.8707
	0.785982	1.51197	Q96EY8	Cob(I)yrinic acid a,c-diamide adenosyltransferase, mitochondrial	MMAB	14.0375	14.1517	11.6812	13.5393	13.6709	14.6031	13.6237	9.85984	10.749	14.1755
	0.148482	0.178998	Q96T76	MMS19 nucleotide excision repair protein homolog	MMS19	11.1424	11.0386	10.8037	9.98379	10.591	11.503	9.54383	11.8417	10.3675	10.906
	0.183196	0.316796	Q9Y6X9	MORC family CW-type zinc finger protein 2	MORC2	12.7749	11.4557	11.1111	11.1617	9.9291	12.2557	10.9974	10.7983	12.7509	9.97822
	0.416824	0.577201	P29372	DNA-3-methyladenine glycosylase	MPG	13.4596	12.4726	12.6266	12.8847	12.9912	11.0464	10.5416	12.4467	13.3044	11.7193
	1.51748	-2.20797	P05164	Myeloperoxidase;Myeloperoxidase;89 kDa myeloperoxidase;84 kDa myeloperoxidase;Myeloperoxidase light chain;Myeloperoxidase heavy chain	MPO	10.0132	11.0516	10.4455	10.0085	10.31	10.6415	14.7997	11.2942	13.9108	10.474
	0.156504	0.216039	P25325	3-mercaptopyruvate sulfurtransferase	MPST	13.7293	13.6682	13.571	13.3872	12.9692	14.4189	13.4419	11.8582	13.5216	14.8101
	0.621014	0.85135	Q6IN84	rRNA methyltransferase 1, mitochondrial	MRM1	12.7615	11.7981	12.428	10.2132	11.976	9.853	9.62332	10.8783	10.9205	11.1923
	0.106451	-0.116559	Q7Z7H8	39S ribosomal protein L10, mitochondrial	MRPL10	9.8016	11.7814	11.732	10.6417	10.3921	11.1919	11.115	10.9666	11.274	10.8044
	0.727475	-0.984879	Q9Y3B7	39S ribosomal protein L11, mitochondrial	MRPL11	9.86813	10.0879	10.412	11.9838	10.8075	12.8845	12.4589	12.2809	10.7911	12.4379
	0.376951	-1.09259	P52815	39S ribosomal protein L12, mitochondrial	MRPL12	11.2433	10.7767	10.7813	11.2656	10.0292	15.0835	14.7379	14.3219	11.3828	10.0474
	0.510915	0.573528	Q6P1L8	39S ribosomal protein L14, mitochondrial	MRPL14	10.0563	11.235	10.9425	10.772	10.364	11.9475	8.8672	10.8977	11.1366	10.3492
	0.393758	0.648488	Q9P015	39S ribosomal protein L15, mitochondrial	MRPL15	13.1123	11.727	12.4353	11.9698	10.6255	13.4638	11.0192	13.5169	10.6437	11.1153
	0.660284	-1.03544	Q9NRX2	39S ribosomal protein L17, mitochondrial	MRPL17	11.0995	11.4486	11.0755	9.23087	12.2306	10.4621	10.9084	12.9064	10.5246	13.5005
	0.534769	-0.806902	Q9H0U6	39S ribosomal protein L18, mitochondrial	MRPL18	9.82079	11.7157	11.5533	10.3708	11.2399	12.4244	13.1663	10.3762	11.4276	13.0074
	0.871797	-1.41617	P49406	39S ribosomal protein L19, mitochondrial	MRPL19	13.6304	13.7285	13.4819	10.84	10.1271	13.768	14.1686	13.7628	13.8372	14.28
	0.016871	-0.030596	Q7Z2W9	39S ribosomal protein L21, mitochondrial	MRPL21	10.7334	11.143	11.9657	11.7979	10.1956	12.5536	12.4309	10.841	10.1745	12.2688
	0.774669	0.6596	Q9NWU5	39S ribosomal protein L22, mitochondrial	MRPL22	11.2602	11.4994	10.401	11.0765	10.1968	12.2612	11.0724	10.3383	10.5816	9.83278
	0.277412	0.299938	Q16540	39S ribosomal protein L23, mitochondrial	MRPL23	10.6808	11.67	9.73835	11.6436	10.0005	11.5074	10.2067	10.8671	10.4928	10.7274
	0.287254	0.297373	P09001	39S ribosomal protein L3, mitochondrial	MRPL3	11.1532	11.3103	10.8548	10.0628	10.7611	11.4175	9.97984	11.9708	10.2935	10.2729
	0.027904	-0.0988764	Q9BQ48	39S ribosomal protein L34, mitochondrial	MRPL34	11.7502	11.8307	10.2876	14.0377	9.76794	10.1027	9.86717	10.2195	14.8403	10.6531
	1.02107	-1.29883	Q9BZE1	39S ribosomal protein L37, mitochondrial	MRPL37	12.1961	11.8173	11.1573	11.174	9.40289	10.5439	13.0722	10.6733	12.3863	13.2578
	0.713842	-1.09264	Q96DV4	39S ribosomal protein L38, mitochondrial	MRPL38	13.5454	10.8471	10.5328	10.8807	10.9546	12.6936	13.9016	11.7812	11.6657	13.3249
	0.763801	-1.27691	Q9NYK5	39S ribosomal protein L39, mitochondrial	MRPL39	11.4259	9.34828	10.8288	11.3829	10.5947	13.6128	12.5275	13.0455	10.8284	13.5018
	0.30015	-0.61598	Q9BYD3	39S ribosomal protein L4, mitochondrial	MRPL4	9.4706	12.2458	12.2384	11.5697	9.86308	11.9362	13.1063	10.037	11.0882	13.115
	0.516868	-0.52557	Q8N983	39S ribosomal protein L43, mitochondrial	MRPL43	11.2478	10.853	10.9255	11.3431	10.1358	10.0979	10.0591	12.0904	10.9171	12.1044
	0.000643287	-0.00103561	Q13405	39S ribosomal protein L49, mitochondrial	MRPL49	10.2982	10.8674	10.5288	9.75165	10.9175	12.2324	10.385	11.8771	10.8986	9.90739
	0.0224027	0.0520764	Q96EL3	39S ribosomal protein L53, mitochondrial	MRPL53	10.0728	12.0371	11.3758	11.5576	9.63255	11.9254	8.96857	10.9427	11.628	12.6533
	0.596529	-0.596385	Q9Y676	28S ribosomal protein S18b, mitochondrial	MRPS18B	11.2645	10.5555	9.11186	10.3172	9.98145	11.4316	10.3051	11.485	11.0133	11.3569
	0.42262	0.717447	Q9Y399	28S ribosomal protein S2, mitochondrial	MRPS2	13.3394	13.6172	13.3645	10.9046	12.1043	13.7096	10.3438	12.9109	11.9489	13.2864
	1.01789	-1.15589	P82650	28S ribosomal protein S22, mitochondrial	MRPS22	12.5135	10.7306	11.3362	10.6145	10.6438	11.07	13.74	11.5449	11.0417	12.9027
	0.237289	-0.553652	Q9Y3D9	28S ribosomal protein S23, mitochondrial	MRPS23	13.3336	12.9901	11.0241	12.7801	10.776	14.186	14.1738	13.9094	10.55	13.6411
	0.304715	-0.866981	Q92552	28S ribosomal protein S27, mitochondrial	MRPS27	15.2164	15.2784	15.278	12.526	9.97488	15.5282	15.4273	15.11	13.378	15.4205
	0.0455062	-0.163044	Q9Y2Q9	28S ribosomal protein S28, mitochondrial	MRPS28	11.1611	14.3711	14.2529	10.864	13.5843	14.8294	14.9611	14.49	13.9518	9.9577
	0.722455	-1.14496	Q92665	28S ribosomal protein S31, mitochondrial	MRPS31	12.9722	10.2781	10.3003	10.6789	11.4336	13.5361	12.9776	12.574	11.5311	13.6299
	0.0394852	0.0732907	P82930	28S ribosomal protein S34, mitochondrial	MRPS34	9.40032	10.536	11.9146	10.8207	12.6026	11.4842	10.1629	11.0066	12.0439	10.9991
	1.13273	-0.871872	Q9Y2R9	28S ribosomal protein S7, mitochondrial	MRPS7	11.5078	10.5825	10.815	10.6591	10.4932	12.2312	12.4404	12.4188	11.5948	11.2261
	0.254814	-0.617666	P82933	28S ribosomal protein S9, mitochondrial	MRPS9	13.7275	10.2951	11.406	10.9979	11.1975	14.1079	12.7534	13.2156	10.3852	13.9376
	0.0715111	-0.228738	Q96E11	Ribosome-recycling factor, mitochondrial	MRRF	14.3077	13.846	13.9996	13.0808	11.2791	16.1773	15.7856	14.177	11.064	15.0154
	0.182386	0.652859	Q9UKD2	mRNA turnover protein 4 homolog	MRTO4	15.2121	10.1132	14.709	10.9941	14.8648	14.2991	10.7721	14.5103	10.9177	14.6499
	0.0481587	0.028477	P26038	Moesin	MSN	16.369	16.0376	16.4918	16.44	16.1809	16.551	16.6736	15.8513	16.7546	15.9869
	0.17947	-0.244604	Q9BTC8	Metastasis-associated protein MTA3	MTA3	11.5889	10.2208	11.395	10.0094	11.2174	9.28418	10.9877	9.99246	11.62	10.8555
	0.386423	-0.441481	Q13126	S-methyl-5-thioadenosine phosphorylase	MTAP	11.5058	11.531	12.086	10.6074	10.5969	10.2519	10.397	12.5989	11.5674	11.5885
	0.756793	-1.05799	P00846	ATP synthase subunit a	MT-ATP6	13.7132	13.6046	13.9921	14.3857	10.6617	13.7603	14.6605	14.205	14.901	13.8771
	1.1334	1.76464	Q9Y6C9	Mitochondrial carrier homolog 2	MTCH2	14.3243	14.0815	14.5545	15.3773	15.9645	14.2641	14.7176	10.9244	14.5904	11.7533
	0.142045	-0.141415	P00403	Cytochrome c oxidase subunit 2	MT-CO2	15.9776	15.7976	16.3119	15.3105	16.3473	17.1157	16.7782	16.0865	15.5791	16.6957
	1.0035	0.821338	P11586	C-1-tetrahydrofolate synthase, cytoplasmic;Methylenetetrahydrofolate dehydrogenase;Methenyltetrahydrofolate cyclohydrolase;Formyltetrahydrofolate synthetase;C-1-tetrahydrofolate synthase, cytoplasmic, N-terminally processed	MTHFD1	16.3215	15.7263	16.2761	16.2039	16.1728	16.2434	15.7153	15.6862	13.7556	16.1868
	0.22141	-0.596598	Q6UB35	Monofunctional C1-tetrahydrofolate synthase, mitochondrial	MTHFD1L	14.8792	15.1324	14.118	12.4093	13.4161	16.8189	16.9991	16.1404	12.5726	14.5235
	0.204068	-0.349805	P13995	Bifunctional methylenetetrahydrofolate dehydrogenase/cyclohydrolase, mitochondrial;NAD-dependent methylenetetrahydrofolate dehydrogenase;Methenyltetrahydrofolate cyclohydrolase	MTHFD2	10.845	10.2955	11.9198	11.1102	11.1092	13.3554	10.7206	12.8171	11.0611	12.5571
	0.207072	-0.873688	P49914	5-formyltetrahydrofolate cyclo-ligase	MTHFS	10.7795	10.3582	11.5571	11.036	11.101	17.0895	17.0084	11.3024	11.9811	11.1503
	0.0344705	-0.0831211	P46199	Translation initiation factor IF-2, mitochondrial	MTIF2	12.5547	12.218	10.9577	10.4154	13.0361	13.5157	14.0813	11.0313	11.0758	12.6091
	0.756637	1.11766	P03905	NADH-ubiquinone oxidoreductase chain 4	MT-ND4	12.6879	13.853	12.5311	11.4225	10.6983	11.0003	12.0345	11.5053	9.53042	10.588
	0.0404756	-0.0721449	P03915	NADH-ubiquinone oxidoreductase chain 5	MT-ND5	12.2314	11.6092	12.3142	10.6852	9.64886	11.1562	12.5019	10.9363	11.529	10.4181
	0.121089	-0.198399	Q9Y2Z2	Protein MTO1 homolog, mitochondrial	MTO1	12.375	10.199	12.635	11.0994	11.6085	10.0879	12.5914	11.3793	11.2338	10.9257
	1.28364	1.14087	P58546	Myotrophin	MTPN	10.6333	11.4084	9.92876	11.8092	12.4388	11.9056	9.91199	10.7832	9.84172	10.3156
	0.271477	-0.655364	P22033	Methylmalonyl-CoA mutase, mitochondrial	MUT	15.27	14.2825	14.483	10.788	15.0213	16.6311	15.3413	15.0415	14.5242	15.365
	0.020286	0.0445859	P35579	Myosin-9	MYH9	12.8937	11.1672	13.2204	13.2338	12.7637	13.1832	13.5591	12.994	13.8942	10.3489
	1.0063	1.00974	P60660;P14649	Myosin light polypeptide 6;Myosin light chain 6B	MYL6;MYL6B	11.4097	10.884	12.1647	11.5319	11.5913	12.1675	12.2565	9.61531	9.78744	10.8012
	0.0817873	-0.132435	Q12965	Unconventional myosin-Ie	MYO1E	10.1204	11.5677	11.0421	10.7256	9.21874	11.2516	11.5175	11.7829	9.93128	9.91552
	0.0040214	-0.0175702	Q13459	Unconventional myosin-IXb	MYO9B	10.9318	13.7448	11.2389	15.9851	14.6421	13.9218	14.8397	10.8205	16.5609	11.4923
	1.41139	0.992528	Q9BQ15	SOSS complex subunit B1	NABP2	11.378	11.2171	11.9351	11.8463	11.0764	10.3034	10.8273	10.5183	10.5368	9.31831
	0.143584	0.357659	E9PAV3	Nascent polypeptide-associated complex subunit alpha, muscle-specific form	NACA	13.3511	13.4867	13.8958	14.6467	10.7184	13.2025	13.0351	10.4571	14.4666	13.4779
	0.587749	-1.05173	Q4G0N4	NAD kinase 2, mitochondrial	NADK2	13.1534	12.2626	13.0149	10.4827	11.5053	14.4459	14.557	13.1697	11.9017	14.4883
	0.40928	-0.520995	P55209	Nucleosome assembly protein 1-like 1	NAP1L1	10.7193	10.5846	10.5069	10.9654	9.24998	12.2893	11.3811	11.6901	10.1844	11.7053
	0.367986	0.761227	O43776	Asparagine--tRNA ligase, cytoplasmic	NARS	12.1037	12.6125	12.469	9.25861	12.9145	10.6966	10.0271	9.8557	12.93	10.8456
	0.522538	-0.251702	Q96I59	Probable asparagine--tRNA ligase, mitochondrial	NARS2	14.5912	14.3339	14.5644	14.1267	13.9936	15.1738	14.4998	14.9656	14.6966	14.7005
	0.775325	0.968401	P42695	Condensin-2 complex subunit D3	NCAPD3	12.9005	13.5681	10.9162	12.4139	11.8174	11.248	10.6849	11.4256	12.3919	10.1999
	0.0655825	-0.0702396	Q9BPX3	Condensin complex subunit 3	NCAPG	10.2469	10.9427	10.3748	11.539	10.0952	11.3116	9.94455	11.0508	11.05	11.2423
	0.0763561	-0.0973252	Q86XI2	Condensin-2 complex subunit G2	NCAPG2	12.0038	11.4228	9.93853	11.0481	9.71125	10.4137	10.6021	11.03	11.0577	10.7249
	0.400372	-0.521381	P52298	Nuclear cap-binding protein subunit 2	NCBP2	9.45207	11.6033	11.5181	11.6491	9.87388	9.66503	10.3424	11.3632	11.3933	11.4943
	0.419759	0.401697	Q96MG7	Melanoma-associated antigen G1	NDNL2	11.9547	12.0096	11.6397	12.3586	10.1602	11.6126	11.2084	10.6919	11.829	11.1543
	1.39673	1.00399	Q92597	Protein NDRG1	NDRG1	18.2728	17.5299	17.5889	16.9719	17.8738	18.0129	17.9313	15.9372	16.5228	16.426
	0.261932	0.607807	O95299	NADH dehydrogenase [ubiquinone] 1 alpha subcomplex subunit 10, mitochondrial	NDUFA10	11.117	13.906	13.8184	12.1223	13.3803	14.8223	15.1527	11.4635	11.9526	11.7777
	0.46974	-0.762901	Q9P0J0	NADH dehydrogenase [ubiquinone] 1 alpha subcomplex subunit 13	NDUFA13	10.9237	10.874	10.4261	10.985	11.3805	12.9473	9.84214	12.7075	12.2175	13.3089
	0.115512	-0.270117	O43678	NADH dehydrogenase [ubiquinone] 1 alpha subcomplex subunit 2	NDUFA2	10.867	11.0216	10.4992	12.4921	9.43449	12.9816	13.5999	11.0234	10.9735	10.3476
	0.703113	-1.51794	Q16718	NADH dehydrogenase [ubiquinone] 1 alpha subcomplex subunit 5	NDUFA5	12.7584	10.6533	10.2755	10.292	9.04817	13.5785	13.2757	13.0111	10.2653	13.9235
	0.107946	0.201123	P56556	NADH dehydrogenase [ubiquinone] 1 alpha subcomplex subunit 6	NDUFA6	11.172	11.1014	10.6213	12.5715	10.9346	13.0054	12.8821	11.8282	10.5888	10.1672
	1.36549	1.88004	Q16795	NADH dehydrogenase [ubiquinone] 1 alpha subcomplex subunit 9, mitochondrial	NDUFA9	13.6466	13.2511	12.5493	12.0844	9.94735	14.1343	10.3804	11.2326	10.9548	10.3208
	0.23321	-0.599195	Q9BU61	NADH dehydrogenase [ubiquinone] 1 alpha subcomplex assembly factor 3	NDUFAF3	11.0524	12.288	10.3973	12.7121	13.4612	13.9825	14.2608	13.8393	9.98103	13.578
	0.130268	0.197379	Q9P032	NADH dehydrogenase [ubiquinone] 1 alpha subcomplex assembly factor 4	NDUFAF4	12.2234	11.3563	11.3863	11.2169	11.7618	10.9734	9.7596	12.8853	11.7595	10.7514
	0.146465	0.241055	Q7L592	NADH dehydrogenase [ubiquinone] complex I, assembly factor 7	NDUFAF7	13.0736	12.9382	13.3142	11.1066	10.544	12.9884	12.0803	11.8418	11.6562	12.7675
	0.838393	-0.757669	O96000	NADH dehydrogenase [ubiquinone] 1 beta subcomplex subunit 10	NDUFB10	11.3106	10.695	10.8088	9.45947	9.78424	10.8231	10.1095	11.4653	11.6174	11.7593
	0.166221	0.309334	O95168	NADH dehydrogenase [ubiquinone] 1 beta subcomplex subunit 4	NDUFB4	12.2267	12.9195	11.6815	13.2059	11.0962	13.7458	10.5509	12.9674	11.6767	13.4847
	0.171162	-0.398387	P28331	NADH-ubiquinone oxidoreductase 75 kDa subunit, mitochondrial	NDUFS1	16.6672	13.1617	16.5922	15.5848	15.6168	17.2553	17.4776	14.588	15.6215	17.1585
	0.121254	-0.26003	O75306	NADH dehydrogenase [ubiquinone] iron-sulfur protein 2, mitochondrial	NDUFS2	14.3121	10.9974	14.6121	13.4644	14.3227	14.9635	14.7383	12.9745	14.6642	13.778
	0.3277	0.675076	O75489	NADH dehydrogenase [ubiquinone] iron-sulfur protein 3, mitochondrial	NDUFS3	15.5889	15.3177	15.2347	14.5327	14.8771	16.6072	16.3283	14.9243	11.7236	15.7624
	0.0815938	-0.276687	O75251	NADH dehydrogenase [ubiquinone] iron-sulfur protein 7, mitochondrial	NDUFS7	13.8518	13.9184	10.4851	12.053	9.36587	10.4757	14.4227	12.6239	10.5285	10.2983
	0.0943945	0.36274	O00217	NADH dehydrogenase [ubiquinone] iron-sulfur protein 8, mitochondrial	NDUFS8	14.8829	14.3702	10.0045	10.5984	13.8008	14.7739	14.7363	11.6778	10.0833	14.3388
	0.890298	-1.96089	P49821	NADH dehydrogenase [ubiquinone] flavoprotein 1, mitochondrial	NDUFV1	14.9001	12.4476	12.7594	10.3331	10.4037	15.0558	16.0869	14.0787	13.2717	15.0061
	0.257359	0.583179	P19404	NADH dehydrogenase [ubiquinone] flavoprotein 2, mitochondrial	NDUFV2	13.7733	13.8623	13.9833	11.6106	13.1814	14.751	15.1229	11.6786	10.9731	14.0006
	0.0414267	0.0749079	Q15843	NEDD8	NEDD8	9.89219	11.1079	11.4344	10.024	10.2127	12.6072	10.5944	9.82025	10.892	11.9126
	0.714476	0.917086	Q8IXH7	Negative elongation factor C/D	NELFCD	13.3312	11.382	11.888	11.655	9.59234	10.9043	9.96002	10.7363	10.6466	10.824
	0.063665	0.126295	Q8NCF5	NFATC2-interacting protein	NFATC2IP	12.7665	8.77148	10.8306	11.6837	10.7517	10.8773	11.4863	10.3072	11.1781	10.3107
	0.218199	-0.238094	Q12857	Nuclear factor 1 A-type	NFIA	9.87738	11.213	11.2226	10.9384	11.2522	9.58427	10.1442	10.9809	11.4763	11.0763
	0.491929	-0.768291	Q9Y697	Cysteine desulfurase, mitochondrial	NFS1	13.2741	11.479	11.3727	10.9444	12.9306	14.2691	14.001	13.3462	12.2357	13.0036
	0.452523	0.373118	Q8NEJ9	Neuroguidin	NGDN	11.6265	11.147	11.811	10.8136	10.275	11.5835	11.3771	11.2193	10.0819	10.667
	0.174445	-0.181453	Q9BYG3	MKI67 FHA domain-interacting nucleolar phosphoprotein	NIFK	11.1863	11.8103	10.6389	9.74701	10.9684	10.4857	10.5518	10.6251	11.6545	11.1188
	1.64493	-1.37104	Q9BPW8	Protein NipSnap homolog 1	NIPSNAP1	11.1026	11.0599	11.2755	11.9583	12.3306	13.1321	13.2825	12.7857	12.6371	14.0182
	0.695748	-0.325201	Q86X76	Nitrilase homolog 1	NIT1	10.8091	10.798	11.0028	10.2167	10.3871	10.3308	11.3475	11.1329	10.3732	10.8103
	0.283382	0.82122	Q9NQR4	Omega-amidase NIT2	NIT2	9.14935	13.6956	13.4666	10.6668	12.945	12.5332	10.291	10.5006	14.3115	9.91627
	0.172421	0.180077	Q9NVX2	Notchless protein homolog 1	NLE1	12.2293	12.7003	11.9466	11.0991	11.5164	10.5729	11.084	11.6288	11.629	11.6476
	0.187596	0.177064	Q9BYT8	Neurolysin, mitochondrial	NLN	10.2278	11.9883	11.1707	11.1503	11.2803	10.7569	11.5664	10.4689	11.2369	10.4024
	0.213558	0.440931	P15531	Nucleoside diphosphate kinase A	NME1	13.4502	13.2344	10.3466	13.1923	11.142	13.2753	10.5079	12.4001	13.3834	11.7054
	1.40381	0.477347	P22392;O60361	Nucleoside diphosphate kinase B;Putative nucleoside diphosphate kinase	NME2;NME2P1	16.8858	16.7236	16.7462	16.8328	17.0338	16.4754	16.0474	15.9932	16.9239	16.2578
	0.0493791	0.038788	Q13423	NAD(P) transhydrogenase, mitochondrial	NNT	18.3696	18.4702	18.5179	17.7785	18.4425	19.0672	19.0248	17.9732	18.1445	18.4663
	0.355527	0.838024	Q9Y3T9	Nucleolar complex protein 2 homolog	NOC2L	14.1287	13.885	9.77657	11.7939	9.80128	10.4251	11.4339	11.0909	10.2649	10.3986
	0.0432843	-0.0485962	Q8WTT2	Nucleolar complex protein 3 homolog	NOC3L	11.1453	9.45538	10.9403	10.6626	9.88534	11.1753	10.678	11.0971	10.3722	10.2231
	0.234419	-0.32573	Q9H6R4	Nucleolar protein 6	NOL6	10.7966	10.9964	9.54429	11.9201	10.5801	10.9867	10.7605	9.87534	12.2881	11.595
	1.10799	1.74429	Q14978	Nucleolar and coiled-body phosphoprotein 1	NOLC1	15.633	15.3047	14.2418	14.8098	14.3781	15.3245	10.2313	13.4065	14.653	14.5267
	1.44235	1.13043	Q15233	Non-POU domain-containing octamer-binding protein	NONO	18.28	18.223	18.1473	18.2017	18.4504	17.8259	15.7254	17.1272	18.4278	16.9501
	1.2243	1.67182	Q9Y2X3	Nucleolar protein 58	NOP58	15.5445	14.5675	14.6	14.3652	14.9874	15.2091	10.4568	13.9065	14.2587	14.2066
	0.394027	0.644046	Q86U38	Nucleolar protein 9	NOP9	13.412	11.0536	13.2239	10.8107	10.2537	10.9856	10.5945	11.6315	11.3955	10.2953
	0.2955	0.435017	Q9Y314	Nitric oxide synthase-interacting protein	NOSIP	11.9971	11.8488	11.4244	11.2979	9.62504	10.2143	10.9568	10.7842	11.5798	9.2109
	1.01762	1.47638	P55786	Puromycin-sensitive aminopeptidase	NPEPPS	14.0736	12.7445	14.0065	13.4387	13.467	11.0217	13.5691	11.509	10.842	10.6756
	0.199078	0.310022	Q8TAT6	Nuclear protein localization protein 4 homolog	NPLOC4	12.0964	10.3245	11.574	10.5485	11.9388	10.5666	9.21499	12.1143	10.9683	11.1614
	2.04386	0.778658	P06748	Nucleophosmin	NPM1	19.1692	18.7119	18.8597	18.6961	19.5118	18.9799	18.0457	17.8235	18.7852	18.1834
	0.211364	-0.32589	O75607	Nucleoplasmin-3	NPM3	10.7246	10.9918	12.5632	10.6281	10.4201	11.2653	9.84667	12.5552	12.1776	11.1195
	0.506233	0.52632	P24468;P10589	COUP transcription factor 2;COUP transcription factor 1	NR2F2;NR2F1	13.0857	10.9736	11.2935	11.03	11.3382	10.3714	10.6952	10.5658	10.7074	11.3212
	0.0621141	0.118793	Q8WV22	Non-structural maintenance of chromosomes element 1 homolog	NSMCE1	11.0193	12.1704	12.4889	10.7074	12.6437	10.4339	11.0361	13.1234	11.3876	10.2868
	1.4217	1.32329	Q9NXX6;Q8N140	Non-structural maintenance of chromosomes element 4 homolog A;EP300-interacting inhibitor of differentiation 3	NSMCE4A;EID3	13.4127	11.671	10.7071	12.2511	12.8882	11.8937	11.5149	10.1701	10.8732	10.6978
	1.0818	-0.827548	P49902	Cytosolic purine 5-nucleotidase	NT5C2	10.5445	10.1837	10.7658	11.284	10.204	11.0709	10.8757	11.9521	12.5198	10.6644
	0.56212	0.854437	Q5TFE4	5-nucleotidase domain-containing protein 1	NT5DC1	12.2584	12.3582	11.6551	10.1039	10.8938	11.1354	9.79594	11.9294	11.6021	8.8581
	1.39981	1.97671	Q9BV86	N-terminal Xaa-Pro-Lys N-methyltransferase 1;N-terminal Xaa-Pro-Lys N-methyltransferase 1, N-terminally processed	NTMT1	14.2134	14.1277	14.2486	13.8468	14.0098	11.0949	10.134	11.2762	13.2105	11.8332
	0.213011	-0.36702	Q9Y266	Nuclear migration protein nudC	NUDC	10.081	10.0616	10.7948	11.7883	10.6037	11.9882	10.1881	12.7418	12.1415	9.94169
	0.471574	1.55918	P57740	Nuclear pore complex protein Nup107	NUP107	14.3458	15.807	14.4656	14.9024	9.45334	10.1588	9.71802	11.5843	13.9131	11.3031
	0.0536132	-0.196975	P49790	Nuclear pore complex protein Nup153	NUP153	13.3115	12.0616	13.3782	11.8441	11.0691	10.1241	10.9235	10.9447	16.4475	10.3312
	0.276624	-0.32784	O75694	Nuclear pore complex protein Nup155	NUP155	14.6722	14.8707	14.4979	14.2027	13.8618	14.0649	13.3132	14.7686	16.1395	14.5369
	0.0380493	0.0884377	Q12769	Nuclear pore complex protein Nup160	NUP160	12.5134	10.5303	10.4056	11.3044	11.8255	10.8237	9.05291	11.2688	13.3618	10.8979
	0.122398	0.56508	Q92621	Nuclear pore complex protein Nup205	NUP205	15.8152	16.0614	9.71602	12.4185	14.0363	11.1329	11.5197	11.124	17.0066	10.8762
	0.11379	0.459759	Q8TEM1	Nuclear pore membrane glycoprotein 210	NUP210	15.2117	13.916	14.8581	10.5217	13.2258	13.0755	10.6955	11.5165	17.6747	12.1466
	0.748531	-0.467402	Q8NFH4	Nucleoporin Nup37	NUP37	10.8046	11.0008	10.2039	11.5259	10.5636	10.0082	10.9046	11.695	11.0404	10.9676
	1.17106	-1.21146	Q9UKX7	Nuclear pore complex protein Nup50	NUP50	10.3934	10.0607	10.2257	10.447	9.06952	10.6163	10.0814	11.7697	12.9138	10.6227
	0.817248	-1.07828	P37198	Nuclear pore glycoprotein p62	NUP62	10.3699	11.3719	11.3901	11.5552	9.14404	10.7003	11.75	11.8935	13.3845	10.306
	0.11633	0.251222	Q9BW27	Nuclear pore complex protein Nup85	NUP85	10.1287	12.132	12.3875	10.4287	11.4057	11.9443	10.0642	10.9097	13.5758	10.0633
	0.197106	0.481235	Q8N1F7	Nuclear pore complex protein Nup93	NUP93	13.2289	13.2541	13.2536	11.8087	11.5684	12.4986	11.2379	11.0251	15.4973	10.7231
	0.251997	-0.235818	P52948	Nuclear pore complex protein Nup98-Nup96;Nuclear pore complex protein Nup98;Nuclear pore complex protein Nup96	NUP98	11.1092	11.5296	9.55295	10.3419	10.7871	10.0988	10.8901	11.2176	10.4654	10.6499
	0.0265952	-0.0469186	Q9Y6K5	2-5-oligoadenylate synthase 3	OAS3	11.219	10.4435	10.873	11.8087	10.6871	10.8888	9.9911	11.1872	12.9792	9.97693
	0.495913	-1.07251	P04181	Ornithine aminotransferase, mitochondrial;Ornithine aminotransferase, hepatic form;Ornithine aminotransferase, renal form	OAT	10.5077	10.6269	12.8852	11.5508	13.338	13.6201	15.3407	11.7072	11.5757	14.019
	0.232086	0.217259	Q56VL3	OCIA domain-containing protein 2	OCIAD2	10.609	10.5478	10.6076	11.2088	11.3116	11.0172	9.45354	10.7045	11.0517	11.4558
	0.0195233	0.0281135	Q02218	2-oxoglutarate dehydrogenase, mitochondrial	OGDH	16.6201	16.5911	16.2801	15.201	15.5736	16.9555	16.651	16.5611	14.8368	16.6528
	0.489331	0.786838	Q8N543	Prolyl 3-hydroxylase OGFOD1	OGFOD1	13.3046	12.1296	9.79201	11.8022	12.0716	10.1998	10.8145	11.0071	11.6149	9.61608
	0.203058	0.34885	O15294	UDP-N-acetylglucosamine--peptide N-acetylglucosaminyltransferase 110 kDa subunit	OGT	10.1309	11.3014	10.6778	12.8724	13.1694	11.4311	11.4685	12.2118	11.0043	10.3087
	1.00008	1.16704	Q9NTK5	Obg-like ATPase 1	OLA1	11.1237	12.4224	13.0999	9.85882	12.0656	12.6796	10.7032	10.2471	11.1933	10.6881
	0.50773	-0.588811	O60313	Dynamin-like 120 kDa protein, mitochondrial;Dynamin-like 120 kDa protein, form S1	OPA1	9.27793	11.922	11.1341	10.1072	11.027	10.3234	11.7716	11.7272	11.0711	10.3131
	0.612994	0.796931	Q13416	Origin recognition complex subunit 2	ORC2	12.5696	12.4452	12.8046	11.1103	10.2504	10.44	10.1747	10.8614	11.6522	10.5375
	0.199897	0.278345	Q9UBD5	Origin recognition complex subunit 3	ORC3	12.071	10.0056	11.2234	9.87861	11.3674	11.4035	9.68679	11.7957	10.6491	10.7214
	1.34578	1.04499	O43913	Origin recognition complex subunit 5	ORC5	13.5007	12.6658	12.8333	11.2502	12.7883	11.7087	11.5957	11.4175	10.9485	11.6897
	1.43134	2.46368	Q96FW1	Ubiquitin thioesterase OTUB1	OTUB1	14.139	14.2681	14.3137	14.8862	14.3484	13.9353	9.15466	10.4084	14.2699	13.5727
	0.21129	-1.52863	Q6IE37	Ovostatin homolog 1	OVOS1	11.0875	10.8797	10.3643	11.1288	19.9449	10.4689	10.5613	22.1874	11.3679	11.2474
	0.0759494	0.0737123	Q15070	Mitochondrial inner membrane protein OXA1L	OXA1L	10.6507	11.3725	10.9707	10.8317	10.5835	10.7864	9.72182	11.1976	11.6004	10.649
	0.0981352	-0.120617	P55809	Succinyl-CoA:3-ketoacid coenzyme A transferase 1, mitochondrial	OXCT1	16.8815	17.1552	17.0969	15.6789	16.4939	17.9771	17.6561	16.2524	16.8651	17.2313
	0.329694	0.835065	Q96HP4	Oxidoreductase NAD-binding domain-containing protein 1	OXNAD1	10.2199	11.9595	10.1854	10.5776	14.7033	14.0212	10.2832	11.8952	12.1073	10.1519
	0.403301	1.05816	P07237	Protein disulfide-isomerase	P4HB	14.1052	9.85138	13.9097	11.1867	10.7021	13.1506	9.6407	10.2958	13.8175	10.6172
	0.220065	0.0698152	Q9UQ80	Proliferation-associated protein 2G4	PA2G4	15.1984	15.2269	15.0954	15.1937	15.6777	15.429	15.4457	15.1918	15.0279	15.2694
	0.262796	-0.368359	P11940	Polyadenylate-binding protein 1	PABPC1	14.5776	13.4227	14.916	15.5577	15.0292	15.0442	13.4306	15.5391	15.607	15.9283
	0.2873	-0.663269	Q13310	Polyadenylate-binding protein 4	PABPC4	12.4876	10.5108	12.6653	10.8384	9.5998	9.76156	10.9231	13.2894	9.45878	12.8907
	1.40321	1.16911	Q86U42	Polyadenylate-binding protein 2	PABPN1	15.6906	15.4014	15.4673	16.4816	16.2836	14.9042	14.0543	14.2037	15.929	13.9556
	1.44597	1.89816	Q8N7H5	RNA polymerase II-associated factor 1 homolog	PAF1	13.8522	10.7253	14.0401	13.9351	13.9616	13.1691	12.415	11.155	10.2335	11.7262
	0.718558	0.457506	P22234	Multifunctional protein ADE2;Phosphoribosylaminoimidazole-succinocarboxamide synthase;Phosphoribosylaminoimidazole carboxylase	PAICS	16.1716	15.248	16.0061	15.8274	15.9448	15.858	15.3284	15.6619	14.4482	16.1021
	0.260311	0.404509	Q9Y3D7	Mitochondrial import inner membrane translocase subunit TIM16	PAM16	11.3842	11.554	11.6111	10.9599	11.8761	13.3636	13.1048	10.1449	11.1237	11.1744
	0.507781	0.856623	P51003;Q9NRJ5	Poly(A) polymerase alpha;Poly(A) polymerase beta	PAPOLA;PAPOLB	13.4069	11.5502	11.3104	10.375	10.1415	13.6146	11.6472	10.58	11.0264	10.2523
	0.0893526	0.179812	O43252	Bifunctional 3-phosphoadenosine 5-phosphosulfate synthase 1;Sulfate adenylyltransferase;Adenylyl-sulfate kinase	PAPSS1	9.56397	9.91272	11.0994	13.1473	11.1555	10.8709	10.438	12.0397	10.8071	9.82907
	0.954001	2.00874	Q86W56	Poly(ADP-ribose) glycohydrolase	PARG	14.7963	14.5616	10.6668	14.0965	14.294	10.0529	10.8945	11.5051	11.7386	10.139
	0.289205	0.574715	Q99497	Protein deglycase DJ-1	PARK7	13.0883	11.2112	13.2346	14.5417	14.0773	12.516	13.7881	10.7501	13.7339	11.8752
	1.22274	1.27955	Q9UGN5	Poly [ADP-ribose] polymerase 2	PARP2	12.503	12.6876	11.6693	10.5187	12.3742	12.6697	11.4065	9.81093	11.8555	10.0906
	0.381403	-0.512693	Q86U86	Protein polybromo-1	PBRM1	10.1711	10.9622	10.7916	10.038	10.4482	11.6336	9.88327	12.9964	10.8404	11.0272
	1.75204	-1.16938	P11498	Pyruvate carboxylase, mitochondrial	PC	23.8981	24.1226	24.1949	23.6909	23.3848	24.9916	25.8856	25.1676	24.2684	25.5445
	1.86408	0.731355	Q15365	Poly(rC)-binding protein 1	PCBP1	18.4211	18.6128	18.6659	18.5128	18.4783	17.9969	17.1095	17.8236	18.3191	17.6143
	1.44678	-0.588909	P05165	Propionyl-CoA carboxylase alpha chain, mitochondrial	PCCA	22.7258	22.2328	22.955	22.3438	22.5123	23.4432	23.443	23.1379	23.2551	23.3281
	0.534606	-0.253067	P05166	Propionyl-CoA carboxylase beta chain, mitochondrial	PCCB	22.7782	22.3643	22.6766	21.8925	22.349	23.1052	22.8909	22.8373	22.5291	22.8655
	0.612457	-0.501887	Q16822	Phosphoenolpyruvate carboxykinase [GTP], mitochondrial	PCK2	18.0568	18.0422	17.8244	17.0978	17.7433	19.2117	18.5224	18.7832	17.8209	18.8652
	0.6272	0.699981	P22061	Protein-L-isoaspartate(D-aspartate) O-methyltransferase	PCMT1	13.0264	11.8038	10.706	11.9787	12.9273	13.1503	10.9112	11.6962	11.2705	12.3838
	1.51511	2.05378	Q8WW12	PEST proteolytic signal-containing nuclear protein	PCNP	12.8239	11.1787	13.3787	14.0696	13.5757	10.4693	10.0903	10.6456	11.4622	9.91744
	0.203332	0.244065	Q14690	Protein RRP5 homolog	PDCD11	10.9519	11.4309	11.9182	11.2655	10.4812	9.99027	9.73778	11.7668	10.8369	10.7076
	0.517066	-0.664886	O14737	Programmed cell death protein 5	PDCD5	11.9008	10.3148	10.3936	10.6579	10.9164	8.49801	10.3337	11.5057	11.3559	11.2519
	0.239968	0.245963	Q8WUM4	Programmed cell death 6-interacting protein	PDCD6IP	11.8223	11.3563	11.9792	10.6262	10.613	10.0901	10.4968	11.433	10.8839	10.5272
	0.435366	0.708697	Q6L8Q7	2,5-phosphodiesterase 12	PDE12	14.2607	14.0995	13.5716	13.5847	12.8659	14.823	13.8631	10.8045	13.3304	14.6375
	0.187026	-0.188554	P08559	Pyruvate dehydrogenase E1 component subunit alpha, somatic form, mitochondrial	PDHA1	17.4715	17.1459	17.4442	16.9838	17.4667	18.9226	18.0794	17.8533	17.06	18.0512
	0.239973	-0.414526	P11177	Pyruvate dehydrogenase E1 component subunit beta, mitochondrial	PDHB	17.712	17.0633	17.1942	15.615	17.0998	18.8297	18.3936	17.9217	15.9182	18.4339
	0.210499	0.48056	O00330	Pyruvate dehydrogenase protein X component, mitochondrial	PDHX	14.2036	11.215	11.0908	10.5026	12.6737	13.5424	13.5645	10.7707	11.7642	10.797
	1.22403	2.04789	P30101	Protein disulfide-isomerase A3	PDIA3	15.4721	14.4089	14.9038	14.2739	15.1729	15.9848	12.9203	13.3745	15.5167	10.1413
	0.00129717	-0.00115546	P13667	Protein disulfide-isomerase A4	PDIA4	11.8694	11.4926	10.659	11.4951	10.8805	11.4108	11.3205	10.6049	11.7044	11.5798
	1.044	0.577906	Q15084	Protein disulfide-isomerase A6	PDIA6	15.034	14.8724	15.3872	14.773	15.2328	15.2926	14.0165	13.8614	15.2805	14.9248
	0.0183725	-0.0334814	Q15120	[Pyruvate dehydrogenase (acetyl-transferring)] kinase isozyme 3, mitochondrial	PDK3	10.2072	12.5164	11.0259	11.3266	9.3385	9.88589	11.4543	10.8555	10.5749	10.1162
	0.338845	0.724632	Q8NCN5	Pyruvate dehydrogenase phosphatase regulatory subunit, mitochondrial	PDPR	13.5932	14.5525	14.103	13.067	13.4126	14.8366	14.4783	14.2043	9.94084	14.188
	1.06346	2.47344	Q8IZL8	Proline-, glutamic acid- and leucine-rich protein 1	PELP1	14.7392	10.5016	13.7933	15.1155	14.6054	9.57327	9.40498	11.3512	10.6832	10.8856
	0.594457	0.928357	O00541	Pescadillo homolog	PES1	13.0936	13.2349	10.6036	11.2909	13.3095	10.2624	10.1789	11.5247	11.3504	11.0958
	0.21723	-0.478912	O15067	Phosphoribosylformylglycinamidine synthase	PFAS	13.8661	10.9841	10.8586	8.9719	10.1027	9.43018	10.7725	11.2395	11.3562	11.3564
	0.221915	-0.374232	Q9UHV9	Prefoldin subunit 2	PFDN2	10.1931	12.0536	10.1072	12.1413	9.52322	10.9395	10.2319	10.7308	12.6123	11.2272
	0.217655	0.339853	Q99471	Prefoldin subunit 5	PFDN5	9.97057	10.4405	11.0622	11.5131	10.5389	12.3527	9.32555	11.1472	11.9646	10.1219
	0.425854	0.870411	Q01813	ATP-dependent 6-phosphofructokinase, platelet type	PFKP	13.5777	13.7994	13.9416	13.2978	10.6843	13.59	13.773	10.955	13.7673	10.6168
	0.464939	-1.13594	Q96HS1	Serine/threonine-protein phosphatase PGAM5, mitochondrial	PGAM5	9.73941	9.9461	11.1247	10.3135	12.1645	14.1459	15.1258	11.7118	11.537	11.1253
	1.58933	2.83544	P07205	Phosphoglycerate kinase 2	PGK2	10.644	14.4306	15.2765	11.4247	14.7435	13.6555	10.0044	9.8837	11.9357	10.2843
	0.0808113	0.141199	P36871	Phosphoglucomutase-1	PGM1	10.5309	10.8235	10.4066	13.2539	11.1006	12.1036	10.7655	11.6875	12.0316	10.4301
	0.0148608	0.0242424	P35232	Prohibitin	PHB	17.8061	17.393	17.6595	16.6038	17.3142	18.8701	17.904	18.1332	16.0529	18.2442
	0.235702	0.229654	Q99623	Prohibitin-2	PHB2	17.8011	17.5926	17.7217	16.2373	17.5342	18.4324	17.1565	17.3658	16.9223	17.8496
	0.366403	-0.442875	Q9UPP1;O75151	Histone lysine demethylase PHF8;Lysine-specific demethylase PHF2	PHF8;PHF2	10.0289	11.3969	12.0272	10.0097	9.23293	10.6053	10.8373	11.1348	10.6763	11.3237
	0.418896	0.232525	O43175	D-3-phosphoglycerate dehydrogenase	PHGDH	16.9815	17.2793	17.2871	17.3459	17.4176	16.9921	16.1587	17.104	17.551	17.1252
	0.177196	0.246359	O75925	E3 SUMO-protein ligase PIAS1	PIAS1	11.5615	10.2756	10.3925	9.79422	11.7941	9.98462	10.0888	11.3332	9.33799	10.7896
	0.168106	0.341298	Q13492	Phosphatidylinositol-binding clathrin assembly protein	PICALM	14.4394	11.8757	13.5615	13.3651	11.0955	14.3204	11.2557	13.2464	13.2629	13.3082
	0.163149	-0.563821	P01833	Polymeric immunoglobulin receptor;Secretory component	PIGR	9.46543	13.9495	9.89065	11.8369	10.6189	15.104	14.8255	11.4838	12.2512	10.9384
	0.650032	-0.730182	Q96S52	GPI transamidase component PIG-S	PIGS	10.5073	9.3543	11.4847	10.2538	9.67122	10.4391	9.5439	11.2776	11.3298	11.9098
	0.0109323	-0.0323808	P12273	Prolactin-inducible protein	PIP	13.142	14.1189	14.3802	13.1427	13.5217	10.7384	12.4068	14.06	15.3824	10.9763
	0.0463869	0.0877202	O00625	Pirin	PIR	11.8698	9.96777	10.1722	11.3819	9.34955	10.7841	9.58703	12.2141	9.92632	10.272
	0.542659	-1.30259	Q5JRX3	Presequence protease, mitochondrial	PITRM1	13.9989	10.725	11.3655	10.2683	10.0792	14.0103	14.9157	12.3286	11.058	13.8729
	2.56847	0.494905	P14618	Pyruvate kinase PKM	PKM	21.4444	21.418	21.4496	21.1934	21.3991	21.4479	20.6635	20.8292	21.275	20.821
	1.32628	1.62644	Q9Y263	Phospholipase A-2-activating protein	PLAA	10.843	11.0799	10.8625	13.5624	13.2546	13.0282	10.1403	11.1795	10.5137	10.0811
	0.443151	-1.03137	Q15149	Plectin	PLEC	11.8104	10.3734	11.5436	12.3054	12.7104	12.2705	16.0876	11.2148	13.4926	10.673
	0.855235	-0.924984	O60664	Perilipin-3	PLIN3	11.3845	11.117	9.49894	9.51285	10.2544	9.72588	10.0056	10.9813	12.2763	11.4325
	0.437122	0.451346	O43660	Pleiotropic regulator 1	PLRG1	11.4096	10.7141	10.2369	11.3691	11.5527	9.89441	11.1048	10.8431	10.3815	9.31633
	1.25184	1.03518	P29590	Protein PML	PML	11.7656	10.3215	11.6757	11.8119	12.5075	10.8047	9.82905	10.5101	11.224	10.2208
	0.224645	0.434866	Q10713	Mitochondrial-processing peptidase subunit alpha	PMPCA	16.7959	16.5129	15.3666	16.823	16.4308	18.3514	17.4648	16.2657	14.0806	17.3032
	0.178433	0.312349	O75439	Mitochondrial-processing peptidase subunit beta	PMPCB	16.5991	16.2162	16.4881	15.8158	16.1338	17.8392	17.1415	16.9897	13.9831	16.6978
	0.599843	-0.457152	Q15126	Phosphomevalonate kinase	PMVK	11.6554	10.5996	10.975	10.9127	11.8781	11.0307	11.8954	11.4437	10.7797	12.4108
	0.461601	0.53292	Q96T60	Bifunctional polynucleotide phosphatase/kinase;Polynucleotide 3-phosphatase;Polynucleotide 5-hydroxyl-kinase	PNKP	12.5	11.8925	12.6105	12.4837	12.4133	10.7305	12.8207	10.6334	11.8376	10.997
	0.0316067	-0.0559695	P00491	Purine nucleoside phosphorylase	PNP	13.0002	12.8124	10.4987	11.8289	12.1992	10.994	12.2603	11.0655	13.0411	11.4125
	1.35022	-0.838729	Q9NP80	Calcium-independent phospholipase A2-gamma	PNPLA8	10.8176	10.1553	11.531	10.8001	10.5258	11.1861	12.0138	10.8128	11.6	12.2723
	0.122382	-0.110449	Q8TCS8	Polyribonucleotide nucleotidyltransferase 1, mitochondrial	PNPT1	16.3488	15.5433	15.7525	16.1603	16.1147	17.3325	16.6263	15.9915	16.1197	16.5391
	0.645826	-1.01945	Q8WVV4	Protein POF1B	POF1B	11.017	10.3606	10.1508	11.1524	11.4451	10.361	9.16503	12.0543	12.3391	13.5106
	0.0488165	-0.10008	Q9Y2S7	Polymerase delta-interacting protein 2	POLDIP2	14.3522	14.5254	13.7168	13.7891	11.6604	15.714	14.4041	14.0099	13.2007	14.6242
	0.946155	1.6746	P56282	DNA polymerase epsilon subunit 2	POLE2	13.9117	11.195	10.9168	14.128	14.2674	10.4844	10.7633	11.5882	10.6736	10.212
	0.533024	0.749133	Q9NRF9	DNA polymerase epsilon subunit 3	POLE3	10.3246	12.3511	11.0427	13.0617	12.5874	12.5793	12.4679	10.1228	11.4047	10.9726
	1.83758	0.928746	Q9NR33	DNA polymerase epsilon subunit 4	POLE4	11.065	12.4012	11.5014	12.0781	11.5994	11.2191	10.9755	10.6472	11.0231	10.2154
	0.0173799	0.039156	P54098	DNA polymerase subunit gamma-1	POLG	12.1168	10.1141	10.3843	10.4796	10.3193	13.8804	11.2336	10.7783	11.1926	11.5018
	0.15205	0.309319	Q9UBT6	DNA polymerase kappa	POLK	12.3286	10.7051	10.6556	12.6945	10.3116	11.6147	9.12359	12.862	10.9629	11.3543
	0.0418492	-0.0910578	P24928	DNA-directed RNA polymerase II subunit RPB1	POLR2A	9.01777	12.0696	10.797	11.4027	10.3385	12.2649	10.2417	10.6898	12.7609	10.5988
	0.0557015	0.0867047	P30876	DNA-directed RNA polymerase II subunit RPB2	POLR2B	10.5277	11.3319	10.7718	10.4181	11.3302	10.0152	9.64856	11.8087	11.6046	9.52124
	0.528818	0.580881	P19388	DNA-directed RNA polymerases I, II, and III subunit RPABC1	POLR2E	10.9883	10.5277	11.7836	11.3519	11.091	9.67843	10.7347	10.6418	10.9525	8.96152
	0.363753	-0.377629	P52434	DNA-directed RNA polymerases I, II, and III subunit RPABC3	POLR2H	12.1594	10.9321	10.1348	11.8158	10.6231	10.3446	11.1692	11.4406	10.8969	12.0103
	0.37159	0.727163	O14802	DNA-directed RNA polymerase III subunit RPC1	POLR3A	13.6831	10.2254	10.8913	11.0202	10.0222	11.3543	8.77943	10.0494	11.9956	11.0647
	0.018217	0.0377187	O00411	DNA-directed RNA polymerase, mitochondrial	POLRMT	12.215	12.6338	10.7612	10.7537	11.198	11.2688	12.5392	11.4396	12.4271	9.33035
	0.327088	-0.831035	Q6S8J3;P0CG38;A5A3E0;P0CG39	POTE ankyrin domain family member E;POTE ankyrin domain family member I;POTE ankyrin domain family member F;POTE ankyrin domain family member J	POTEE;POTEI;POTEF;POTEJ	10.0036	11.1124	9.47375	10.4495	10.293	13.5259	14.6223	9.95709	11.3697	10.6138
	1.02095	0.896172	P14859	POU domain, class 2, transcription factor 1	POU2F1	11.2444	11.3714	11.5658	10.9268	12.3799	10.3109	10.3025	11.1435	10.8552	9.31354
	0.829634	1.44504	Q15181	Inorganic pyrophosphatase	PPA1	14.4555	14.2248	11.7808	13.8787	14.26	14.6342	14.3201	10.8835	13.6749	10.8308
	0.364505	0.683596	Q9H2U2	Inorganic pyrophosphatase 2, mitochondrial	PPA2	13.8693	13.1863	11.697	12.9053	12.9489	14.5861	13.7938	10.0672	13.1927	13.0072
	0.368536	0.592243	P23284	Peptidyl-prolyl cis-trans isomerase B	PPIB	15.0735	14.595	14.9633	14.9138	15.2526	14.9608	11.7471	15.2202	15.62	14.883
	0.30535	-0.851559	P30405	Peptidyl-prolyl cis-trans isomerase F, mitochondrial	PPIF	13.357	13.6757	10.9324	10.9394	9.09847	14.0636	13.9545	10.8423	12.3388	14.3151
	0.277734	0.74977	O43447	Peptidyl-prolyl cis-trans isomerase H	PPIH	12.9263	12.0948	11.9516	13.8872	8.85647	10.6645	11.2408	12.519	11.6676	8.49409
	0.0370988	-0.256601	O60437	Periplakin	PPL	19.3405	20.8163	14.1819	16.0667	19.3457	13.2595	20.9702	15.2629	11.9403	21.5265
	0.415099	-0.994758	P50336	Protoporphyrinogen oxidase	PPOX	11.2586	11.6851	10.4058	10.4895	9.68013	14.5518	14.1523	11.428	13.1419	10.6375
	1.16376	3.65045	P62136;P36873	Serine/threonine-protein phosphatase PP1-alpha catalytic subunit;Serine/threonine-protein phosphatase PP1-gamma catalytic subunit	PPP1CA;PPP1CC	16.7697	16.8642	16.7965	16.7006	16.7415	15.9676	10.0742	10.7995	19.4761	11.6084
	0.475083	1.01382	P62140	Serine/threonine-protein phosphatase PP1-beta catalytic subunit	PPP1CB	13.6168	10.3278	13.5963	14.6211	13.8866	13.5479	12.9349	9.91807	13.4663	12.6896
	0.986612	0.915438	Q96QC0	Serine/threonine-protein phosphatase 1 regulatory subunit 10	PPP1R10	12.2238	10.8987	12.3912	12.9719	12.4726	11.7334	10.1937	11.1681	12.2792	11.1584
	0.860358	1.12545	Q12972	Nuclear inhibitor of protein phosphatase 1;Activator of RNA decay	PPP1R8	12.2574	10.4023	12.672	12.9913	13.0318	12.5573	10.845	12.1235	12.1223	9.68215
	0.111969	0.403805	P30153	Serine/threonine-protein phosphatase 2A 65 kDa regulatory subunit A alpha isoform	PPP2R1A	15.13	11.448	13.6048	11.3743	11.1256	11.1878	10.1831	11.5162	15.7766	10.1559
	0.494078	-0.643059	Q00005;P63151;Q66LE6	Serine/threonine-protein phosphatase 2A 55 kDa regulatory subunit B beta isoform;Serine/threonine-protein phosphatase 2A 55 kDa regulatory subunit B alpha isoform;Serine/threonine-protein phosphatase 2A 55 kDa regulatory subunit B delta isoform	PPP2R2B;PPP2R2A;PPP2R2D	9.34833	11.5987	10.9599	10.8062	11.3595	9.68891	10.7423	12.5261	11.5463	10.2652
	0.936732	0.391164	Q06830	Peroxiredoxin-1	PRDX1	19.189	19.0116	19.4687	19.8554	20.056	19.7151	18.9166	19.1919	19.4342	19.0899
	1.6358	0.476133	P32119	Peroxiredoxin-2	PRDX2	17.9774	17.4356	18.0823	18.208	18.1453	18.0489	17.1593	17.6517	17.5827	17.6335
	0.919945	-0.641063	P30048	Thioredoxin-dependent peroxide reductase, mitochondrial	PRDX3	18.5431	17.787	18.3733	17.735	17.9704	19.3213	19.4208	18.731	18.289	19.277
	0.356132	0.630432	Q13162	Peroxiredoxin-4	PRDX4	13.0515	13.0135	13.5061	13.1041	12.8988	10.6222	12.7595	11.2499	13.7195	10.5467
	0.416609	0.207401	P30044	Peroxiredoxin-5, mitochondrial	PRDX5	19.3837	18.7961	19.3735	19.1084	19.311	20.0462	19.0712	19.1154	18.9281	19.4017
	1.82933	0.701212	P30041	Peroxiredoxin-6	PRDX6	17.4755	17.3221	17.4893	17.8256	17.7477	16.9668	16.5397	16.5008	17.3784	16.6609
	1.0448	1.38011	O14744	Protein arginine N-methyltransferase 5;Protein arginine N-methyltransferase 5, N-terminally processed	PRMT5	13.0767	12.8608	12.8089	10.6282	12.7386	9.95058	10.7013	10.9446	9.94127	10.935
	1.1426	1.81569	O43172	U4/U6 small nuclear ribonucleoprotein Prp4	PRPF4	13.8089	11.5366	13.4419	13.6155	13.7773	9.7056	10.857	11.1827	10.1603	11.1278
	0.851753	1.81211	P11908	Ribose-phosphate pyrophosphokinase 2	PRPS2	10.6772	13.4876	14.2115	14.3531	13.6215	10.8385	10.3901	11.1352	13.4748	9.21108
	0.67051	-0.554445	Q16378	Proline-rich protein 4	PRR4	10.5127	10.988	10.9028	11.0529	9.89319	10.2606	9.94416	11.5952	11.8603	11.2249
	0.0366943	0.0399974	Q9Y617	Phosphoserine aminotransferase	PSAT1	10.778	10.4712	11.0828	9.91517	10.27	10.2304	10.0109	9.69079	11.5212	10.4488
	0.947843	2.33743	P25786	Proteasome subunit alpha type-1	PSMA1	15.2678	11.8514	15.0816	15.6459	15.7638	14.6008	9.44567	14.3271	15.0357	10.6494
	0.519397	0.775917	P25787	Proteasome subunit alpha type-2	PSMA2	11.2648	10.2593	10.3285	11.1052	13.0699	11.9621	10.806	11.1236	11.4045	8.88892
	0.535901	0.643204	P25788	Proteasome subunit alpha type-3	PSMA3	12.244	10.5387	11.9418	12.953	12.5301	11.3452	10.0243	11.3169	11.6663	12.1216
	0.914295	1.3854	P25789	Proteasome subunit alpha type-4	PSMA4	12.8961	10.7845	13.3754	13.9141	13.753	12.3744	10.6346	11.3149	13.4368	10.4705
	1.42604	1.61313	P28066	Proteasome subunit alpha type-5	PSMA5	14.6003	13.6712	14.747	13.9219	14.7199	12.9695	13.7304	12.1379	13.3644	10.7346
	1.4078	2.0385	P60900	Proteasome subunit alpha type-6	PSMA6	12.6726	13.0371	13.4945	14.0569	13.3986	12.2849	10.0819	11.0619	13.8428	9.48908
	1.11064	1.75428	O14818	Proteasome subunit alpha type-7	PSMA7	15.4563	15.0056	15.6585	15.7965	15.5918	15.219	10.5129	14.3582	15.2734	14.6567
	0.333473	0.617624	P20618	Proteasome subunit beta type-1	PSMB1	12.9436	10.2321	9.37313	12.4209	12.6401	12.5088	10.6373	10.4416	11.7907	11.4057
	0.692518	1.42783	P49721	Proteasome subunit beta type-2	PSMB2	13.9433	13.9318	11.2853	13.6852	15.2284	12.9599	10.4436	13.7986	10.2847	13.7844
	1.42617	1.68178	P49720	Proteasome subunit beta type-3	PSMB3	13.3643	14.3779	14.5174	11.9445	13.8185	12.7202	11.5013	11.4912	13.3773	10.7316
	0.24869	-0.204743	P28070	Proteasome subunit beta type-4	PSMB4	10.8797	11.6472	10.3939	10.3121	11.8028	10.7074	10.7834	11.1633	11.2617	11.4394
	0.819328	1.02106	P28074	Proteasome subunit beta type-5	PSMB5	12.7015	11.2674	12.2712	12.8334	10.8329	12.4332	10.797	10.1766	12.8574	10.3111
	0.730932	0.827324	P28072	Proteasome subunit beta type-6	PSMB6	11.8911	11.3534	12.29	13.1614	13.5289	12.6527	10.8689	10.728	12.7302	12.2821
	0.56175	-0.807904	P62191	26S protease regulatory subunit 4	PSMC1	10.3468	10.552	11.4575	10.5557	10.8125	10.555	9.75298	12.3085	13.4429	10.5802
	1.21048	1.93387	P17980	26S protease regulatory subunit 6A	PSMC3	10.4116	12.3142	13.8384	14.3463	13.3412	13.6868	10.0897	12.7063	11.4389	9.98872
	0.03282	0.0749551	P62195	26S protease regulatory subunit 8	PSMC5	10.8387	14.0575	13.3876	10.9819	11.7557	11.277	10.6347	12.0649	13.0699	12.1296
	0.314664	-0.389088	P62333	26S protease regulatory subunit 10B	PSMC6	10.2417	11.1656	10.4218	10.1608	12.5702	10.6392	10.8107	12.2166	11.1148	10.8805
	0.0190636	-0.0466666	Q99460	26S proteasome non-ATPase regulatory subunit 1	PSMD1	13.078	11.0532	13.3414	10.4847	11.3754	10.3822	10.1713	12.2062	13.2089	11.0768
	0.351952	0.615247	O00232	26S proteasome non-ATPase regulatory subunit 12	PSMD12	10.3311	11.0449	12.8619	13.0042	12.6951	12.3353	9.98375	11.1582	13.1758	11.403
	0.141986	-0.181192	O43242	26S proteasome non-ATPase regulatory subunit 3	PSMD3	10.6201	10.361	11.5969	10.5084	11.5925	10.3671	9.70262	12.0333	11.3307	11.0221
	0.166036	0.241622	P48556	26S proteasome non-ATPase regulatory subunit 8	PSMD8	12.4752	11.6196	12.2559	10.7463	9.93415	12.0502	10.5798	12.1801	11.2875	11.0404
	1.1938	1.35636	Q06323	Proteasome activator complex subunit 1	PSME1	12.8444	13.0183	10.6081	10.3973	12.8197	11.5717	10.0014	10.5869	10.3844	11.1081
	0.0791361	-0.108831	Q9UL46	Proteasome activator complex subunit 2	PSME2	11.0131	11.4579	10.0679	10.4718	10.3204	11.7278	9.7565	11.6449	11.7413	10.6651
	1.35037	1.04924	Q969U7	Proteasome assembly chaperone 2	PSMG2	12.3407	12.5498	12.4182	12.5782	12.987	11.3026	11.2626	10.9012	12.5087	10.5815
	1.71858	0.992794	P26599	Polypyrimidine tract-binding protein 1	PTBP1	19.9872	20.1201	19.9625	20.3203	20.0261	19.2366	18.3228	18.8097	19.9739	18.691
	0.826862	1.21659	O75127	Pentatricopeptide repeat-containing protein 1, mitochondrial	PTCD1	10.4513	13.3738	10.686	11.9258	10.049	12.6885	11.4735	9.86314	10.3895	9.52377
	0.188461	-0.665672	Q96EY7	Pentatricopeptide repeat domain-containing protein 3, mitochondrial	PTCD3	13.9043	13.965	13.0726	10.5826	11.7133	16.377	15.8472	14.4328	10.4077	15.0515
	0.254556	0.767534	Q3KNS1	Patched domain-containing protein 3	PTCHD3	8.27435	15.0232	10.3042	9.67451	11.6877	10.0528	10.9202	8.63176	10.4248	10.2976
	0.00752501	-0.022242	P48651	Phosphatidylserine synthase 1	PTDSS1	10.1458	13.7425	10.5154	10.6432	11.3412	11.043	10.034	10.642	14.09	10.2769
	0.645092	0.90522	Q14914	Prostaglandin reductase 1	PTGR1	13.1815	13.0898	13.5548	10.5433	13.3322	11.7027	10.6127	12.42	11.3669	12.2491
	0.749547	-0.609876	Q8WUK0	Phosphatidylglycerophosphatase and protein-tyrosine phosphatase 1	PTPMT1	12.8824	13.3622	13.386	12.5264	12.5192	14.5003	13.5841	13.5579	13.6638	14.418
	1.50452	2.9348	Q9UHX1	Poly(U)-binding-splicing factor PUF60	PUF60	15.341	13.6047	14.6755	15.4977	14.8682	14.6157	10.6222	11.8084	15.6004	9.29848
	0.433062	-1.13198	Q9Y606	tRNA pseudouridine synthase A, mitochondrial	PUS1	15.6617	10.7389	15.3948	11.5822	14.8073	16.0822	15.7766	15.1433	14.4154	15.3706
	0.136823	0.30999	A0A0B4J2E5;Q15269	Periodic tryptophan protein 2 homolog	PWP2	12.8037	13.4415	13.3982	11.0066	13.4841	9.70635	11.0893	11.7703	12.9701	12.1574
	0.83116	-0.67283	P32322	Pyrroline-5-carboxylate reductase 1, mitochondrial	PYCR1	15.6892	15.0466	15.1046	14.2919	15.1362	16.6102	16.0556	15.914	15.5639	16.4103
	0.231397	-0.214221	Q96C36	Pyrroline-5-carboxylate reductase 2	PYCR2	15.6701	15.7883	15.7218	15.0095	15.1126	16.8138	15.6512	16.4906	15.4041	16.0551
	0.348101	-0.575795	P06737	Glycogen phosphorylase, liver form	PYGL	10.3639	10.4371	10.7588	11.4273	10.0983	12.1151	12.8978	10.7063	12.532	9.63409
	0.019654	0.0254154	Q2TAL8	Glutamine-rich protein 1	QRICH1	10.7381	10.6091	10.6473	12.0163	12.1036	10.2418	10.7478	10.9586	11.7054	10.724
	0.672491	-0.914185	P61026	Ras-related protein Rab-10	RAB10	11.342	10.7579	10.4361	10.4348	12.4886	11.9682	12.1774	10.407	12.4671	13.557
	1.09468	-1.10573	P62491;Q15907	Ras-related protein Rab-11A;Ras-related protein Rab-11B	RAB11A;RAB11B	9.21757	11.0036	11.6571	11.3281	10.4377	12.1114	12.0119	11.4568	12.31	12.4811
	0.911988	-1.24666	P61106	Ras-related protein Rab-14	RAB14	10.4214	12.5415	10.8751	10.7245	9.3482	12.4543	12.9488	12.5833	12.7077	10.9901
	0.56837	-0.950625	Q9H0U4;P62820;Q92928	Ras-related protein Rab-1B;Ras-related protein Rab-1A;Putative Ras-related protein Rab-1C	RAB1B;RAB1A;RAB1C	14.5083	10.9989	14.5608	13.4644	13.8134	15.3595	15.0192	14.9643	13.9173	15.0386
	1.23566	-1.01434	P51148;P61020	Ras-related protein Rab-5C;Ras-related protein Rab-5B	RAB5C;RAB5B	11.661	11.0426	11.3922	10.0761	10.5892	12.454	12.5366	12.512	11.6053	12.2135
	0.133301	0.44837	Q9NRW1;Q53S08;P20340;Q14964;Q9H0N0	Ras-related protein Rab-6B;Ras-related protein Rab-6A;Ras-related protein Rab-39A;Ras-related protein Rab-6C	RAB6B;RAB6C;RAB6A;RAB39A	14.3785	11.9412	14.6869	11.6417	14.4972	15.1536	15.5407	15.4311	11.4968	10.604
	0.208138	0.401339	P51149	Ras-related protein Rab-7a	RAB7A	12.257	11.2562	12.377	10.1988	11.2581	12.8244	9.32624	11.3035	11.5282	13.0177
	1.33773	2.6786	Q9H0H5	Rac GTPase-activating protein 1	RACGAP1	15.5836	10.1969	11.3798	14.819	15.0885	13.1152	10.4808	11.203	10.9318	10.1253
	1.00361	1.40021	P54727	UV excision repair protein RAD23 homolog B	RAD23B	13.0102	13.2162	12.7975	14.311	13.5521	12.3216	10.3836	10.7024	14.087	12.0318
	0.676373	0.937777	Q99638	Cell cycle checkpoint control protein RAD9A	RAD9A	13.2406	10.5269	10.9942	12.3861	12.118	12.1865	9.26572	11.1452	12.0013	11.4715
	0.0988744	0.109983	P78406	mRNA export factor	RAE1	10.6544	11.5916	10.7377	10.8431	10.7622	11.4966	9.58388	11.4698	11.4404	11.1231
	0.777535	-0.491823	Q7Z5J4	Retinoic acid-induced protein 1	RAI1	9.97423	10.3799	11.2455	11.0371	10.4328	11.0494	10.9896	11.4132	10.5702	11.7402
	1.16673	2.28531	Q9UKM9	RNA-binding protein Raly	RALY	15.7074	15.188	15.7164	15.832	15.966	14.1754	11.4934	10.5026	16.1277	14.4586
	2.22428	0.709699	P62826	GTP-binding nuclear protein Ran	RAN	18.883	18.9361	19.0909	19.1995	19.2736	18.6446	17.8958	18.1768	18.8076	18.2995
	0.048411	0.0516301	Q9H6Z4	Ran-binding protein 3	RANBP3	10.4433	11.1429	11.4789	10.6454	9.53982	10.5705	9.96154	10.8358	10.7849	10.7586
	1.81113	1.19823	P61224;P62834;A6NIZ1	Ras-related protein Rap-1b;Ras-related protein Rap-1A;Ras-related protein Rap-1b-like protein	RAP1B;RAP1A	11.3257	10.6675	12.0722	12.6634	11.8557	12.4497	10.9919	10.5983	10.5794	10.3936
	1.50939	-3.06151	P47736	Rap1 GTPase-activating protein 1	RAP1GAP	11.0577	9.91794	10.2232	12.1804	11.6614	12.0416	10.1995	15.749	15.4181	15.6009
	1.60601	1.13636	P54136	Arginine--tRNA ligase, cytoplasmic	RARS	13.514	13.3886	13.1626	12.6786	11.8621	13.4402	12.4658	11.3893	12.3788	11.2513
	0.328203	0.445629	Q5T160	Probable arginine--tRNA ligase, mitochondrial	RARS2	10.9176	10.7197	12.2652	10.1482	9.35925	12.2168	10.4749	10.3228	10.5064	10.6646
	0.4269	1.25655	Q8IY67	Ribonucleoprotein PTB-binding 1	RAVER1	15.1139	10.8434	14.814	15.2818	14.4166	10.4225	11.2212	12.3628	14.653	10.6649
	0.31876	-0.417096	Q15291	Retinoblastoma-binding protein 5	RBBP5	12.2305	10.502	11.6	12.2515	12.325	10.9243	11.8306	13.5442	11.3171	11.532
	1.33211	1.45094	Q99708	DNA endonuclease RBBP8	RBBP8	12.784	10.7609	12.2798	12.1527	13.7449	11.2163	10.0054	11.4674	11.1601	10.1891
	0.802781	0.453142	Q8N0V3	Putative ribosome-binding factor A, mitochondrial	RBFA	10.4215	11.1474	11.0027	11.1832	10.9175	10.6392	9.74247	11.2504	10.2691	10.4665
	1.46143	1.64273	Q9NTZ6	RNA-binding protein 12	RBM12	13.5929	13.1639	13.6064	13.8825	14.5317	12.8911	11.3107	11.045	14.1445	11.3746
	0.505775	0.576014	Q96PK6	RNA-binding protein 14	RBM14	16.0853	16.3254	16.4331	16.2063	16.7304	15.8711	13.9118	15.7529	16.9737	16.1587
	0.974566	0.615464	Q9Y4C8	Probable RNA-binding protein 19	RBM19	11.2649	11.7186	11.5064	11.4677	10.4925	12.0029	10.3253	10.3441	11.3709	11.1333
	1.14584	-0.69574	Q5T8P6;Q9P2N5	RNA-binding protein 26;RNA-binding protein 27	RBM26;RBM27	10.411	10.7465	11.4919	10.7695	10.5425	10.4874	11.582	11.9969	11.7155	10.4544
	0.0416509	-0.0685566	Q9NW13	RNA-binding protein 28	RBM28	10.0445	12.4915	11.4425	10.1102	10.8504	11.1139	10.3934	11.5586	12.0564	10.3012
	0.623386	0.897999	Q9BWF3;Q9BQ04	RNA-binding protein 4;RNA-binding protein 4B	RBM4;RBM4B	11.4886	11.1208	11.7618	10.5762	13.9701	13.3584	10.4741	11.3146	11.2034	11.5999
	0.0328538	0.0684814	Q9BTD8	RNA-binding protein 42	RBM42	11.4869	11.3136	10.5825	13.8096	9.74412	11.3592	10.5906	11.2203	11.8088	11.637
	0.00982443	0.0102907	P38159;Q96E39	RNA-binding motif protein, X chromosome;RNA-binding motif protein, X chromosome, N-terminally processed;RNA binding motif protein, X-linked-like-1	RBMX;RBMXL1	16.696	16.7017	16.647	15.4069	16.8544	16.5063	15.6901	16.4986	17.1033	16.5417
	0.941515	2.15281	P18754	Regulator of chromosome condensation	RCC1	17.4007	17.4055	17.5753	17.6006	17.467	16.7708	10.7704	16.1135	17.7022	16.2826
	0.75604	-0.388847	Q9BWE0	Replication initiator 1	REPIN1	10.741	10.9778	10.7145	10.579	11.6811	11.0221	11.1898	11.8261	10.8412	11.5085
	0.191074	0.171476	P22670	MHC class II regulatory factor RFX1	RFX1	10.6765	11.0293	10.4502	11.8937	10.7243	11.6101	10.7171	10.8141	11.6322	10.4068
	1.10837	-1.89278	Q96TC7	Regulator of microtubule dynamics protein 3	RMDN3	10.9993	9.3889	13.9594	11.6503	11.4632	13.6524	13.6511	13.7898	12.7309	14.8083
	0.316826	0.468361	Q96E14	RecQ-mediated genome instability protein 2	RMI2	10.279	12.4599	11.7886	10.4732	9.69066	10.1047	9.75111	10.3969	11.4409	9.7349
	1.48982	2.00082	Q8TDP1	Ribonuclease H2 subunit C	RNASEH2C	14.0758	11.2402	13.3245	14.946	14.521	13.326	11.5738	10.6812	11.0892	12.9416
	1.67239	1.70752	Q5VTR2	E3 ubiquitin-protein ligase BRE1A	RNF20	13.4828	13.8902	13.3137	11.0803	13.3792	13.5961	10.5836	11.1221	11.6409	12.3182
	1.16981	-2.37255	Q63HN8	E3 ubiquitin-protein ligase RNF213	RNF213	10.5865	10.5456	11.4168	11.9785	10.0137	10.3771	15.4088	10.903	10.8419	15.6154
	0.67289	0.871138	O75150	E3 ubiquitin-protein ligase BRE1B	RNF40	12.0098	11.7838	11.035	12.2987	13.2723	10.276	11.6243	9.91253	11.7635	10.3321
	0.187049	-0.302541	O43148	mRNA cap guanine-N7 methyltransferase	RNMT	10.3604	10.0376	11.735	12.2149	9.0851	10.0859	11.3059	11.4522	10.6386	10.1595
	0.257865	-0.320887	Q9HC36	rRNA methyltransferase 3, mitochondrial	RNMTL1	10.3446	10.4422	11.1912	11.2788	10.5116	9.60075	10.2234	10.7824	12.3814	10.1426
	0.655803	1.23728	Q9H4A4	Aminopeptidase B	RNPEP	11.3967	10.7962	13.5239	13.6072	13.7785	11.0247	9.0962	11.5454	11.1865	12.6409
	1.46716	2.80836	P35244	Replication protein A 14 kDa subunit	RPA3	15.1668	14.2365	10.5436	15.1052	15.7071	11.884	10.2599	11.7372	11.4315	10.4334
	0.0106255	0.0366124	P62906	60S ribosomal protein L10a	RPL10A	10.8753	14.2358	14.2038	14.7377	14.4379	10.98	10.5728	13.5554	14.7767	13.929
	1.12416	-0.88203	Q96L21;P27635	60S ribosomal protein L10-like;60S ribosomal protein L10	RPL10L;RPL10	12.2818	13.083	12.7953	13.6482	13.6119	12.0318	13.4917	13.3442	14.7798	13.5471
	0.193941	-0.121857	P62913	60S ribosomal protein L11	RPL11	15.4685	15.9662	16.0577	16.0639	15.6873	15.5864	15.7509	15.2408	16.3349	16.3807
	1.11472	-0.480997	P30050	60S ribosomal protein L12	RPL12	15.7988	15.777	16.2612	15.994	15.6669	16.1639	15.7937	16.2125	16.8736	16.8188
	0.0271043	-0.0381472	P26373	60S ribosomal protein L13	RPL13	15.3808	15.6198	15.4508	16.366	15.6572	15.2033	15.1404	14.5162	17.12	15.828
	0.105537	-0.428619	P40429;Q6NVV1	60S ribosomal protein L13a;Putative 60S ribosomal protein L13a protein RPL13AP3	RPL13A;RPL13AP3	14.6888	14.501	14.145	16.5264	13.074	10.597	15.4595	13.1912	17.6848	11.0672
	0.336506	0.917775	P50914	60S ribosomal protein L14	RPL14	16.1936	15.5829	16.2897	16.6031	15.2122	14.6422	15.8518	11.3631	18.0738	14.056
	0.0677541	-0.226288	P61313	60S ribosomal protein L15	RPL15	13.0806	12.9366	11.0306	12.226	11.974	9.87588	9.96659	10.2458	15.5982	12.5103
	0.0687211	0.198373	P18621	60S ribosomal protein L17	RPL17	13.3088	11.6102	11.901	11.5161	8.40198	13.3334	9.96843	11.123	11.9438	12.8855
	0.480542	-0.6697	Q07020	60S ribosomal protein L18	RPL18	16.2675	16.2403	16.7297	18.3728	16.2673	15.7279	17.2713	16.7029	18.8342	16.2741
	0.73508	-1.61137	Q02543	60S ribosomal protein L18a	RPL18A	10.954	13.1272	11.1175	14.7667	10.5531	10.4375	12.8457	13.7255	15.5832	11.5951
	0.21987	0.532407	P84098	60S ribosomal protein L19	RPL19	13.1019	13.9566	10.7525	14.4015	13.7056	13.9523	12.9423	11.1105	15.2403	11.8242
	0.121509	-0.440188	P46778	60S ribosomal protein L21	RPL21	14.0636	11.3326	10.631	15.1831	13.6487	12.5126	13.8118	12.0069	16.8208	10.7024
	0.458995	-0.341381	P35268	60S ribosomal protein L22	RPL22	15.7661	15.1953	15.9074	16.1243	15.6655	15.1426	15.464	15.8449	17.0011	15.5897
	1.54916	1.49981	P62829	60S ribosomal protein L23	RPL23	16.2997	16.2736	16.0066	16.553	16.3116	16.0506	13.8195	16.2025	15.6571	13.3184
	0.0321307	0.0700811	P62750	60S ribosomal protein L23a	RPL23A	12.8536	14.2476	13.5035	13.7184	12.6166	13.9679	10.8359	14.0157	14.5872	14.2192
	0.13499	0.203208	P83731	60S ribosomal protein L24	RPL24	15.7072	15.5804	15.7137	16.1765	15.2258	14.1594	15.1594	14.6545	16.8489	14.2329
	0.322492	1.07641	P61254;Q9UNX3	60S ribosomal protein L26;60S ribosomal protein L26-like 1	RPL26;RPL26L1	13.8879	14.2251	13.9998	15.0626	13.6083	9.73063	10.0344	10.6904	16.0999	12.5459
	0.232041	-0.505585	P61353	60S ribosomal protein L27	RPL27	15.231	15.029	15.3461	17.5129	15.2553	14.6151	15.6456	15.3278	18.6325	14.4093
	0.00546062	0.00448958	P46776	60S ribosomal protein L27a	RPL27A	15.7174	16.085	15.9688	15.8434	15.3871	15.4274	15.9732	15.8	14.8846	16.2769
	0.710524	2.00782	P46779	60S ribosomal protein L28	RPL28	15.5413	15.8111	15.1201	17.6488	15.4894	15.9979	13.919	11.321	18.7317	11.7363
	0.421908	-0.621026	P47914	60S ribosomal protein L29	RPL29	12.4379	13.6509	12.8991	14.1074	12.5215	13.1021	14.5495	13.603	15.0629	11.7479
	0.715755	1.48506	P39023	60S ribosomal protein L3	RPL3	15.4669	15.2088	15.2015	16.0946	15.351	15.0164	14.0211	10.4504	16.7291	14.4186
	0.255494	0.386912	P62888	60S ribosomal protein L30	RPL30	15.4623	15.386	15.6642	15.3315	14.9926	13.8334	13.815	14.1583	16.7172	14.2085
	0.111302	-0.108094	P62899	60S ribosomal protein L31	RPL31	13.4345	14.088	13.4087	14.0982	13.5607	13.1127	13.1497	13.3359	14.8421	13.5733
	0.237532	0.728105	P62910	60S ribosomal protein L32	RPL32	11.0881	11.5337	12.1322	13.8215	12.9797	13.1823	9.91866	11.6159	15.8329	9.5451
	0.0590514	-0.156572	P49207	60S ribosomal protein L34	RPL34	14.7285	14.0947	14.2502	16.5073	14.9683	13.7039	15.3149	12.5817	17.4017	14.1633
	0.402625	1.15899	P42766	60S ribosomal protein L35	RPL35	14.7417	13.3078	14.7788	16.1203	14.6773	15.7234	15.2683	11.5883	17.2064	10.8673
	0.333129	-1.033	P18077	60S ribosomal protein L35a	RPL35A	11.7829	10.9744	10.2213	14.7776	10.2892	14.0165	13.7914	11.4392	15.9451	10.9976
	0.0212197	-0.0583834	Q9Y3U8	60S ribosomal protein L36	RPL36	11.4435	12.9065	11.8413	12.7519	11.2882	10.1342	10.9552	10.045	14.6367	11.507
	0.0755205	-0.130282	P61513	60S ribosomal protein L37a	RPL37A	10.0279	11.4939	12.6381	10.2076	10.4525	10.4479	11.2459	9.82617	10.9266	12.0345
	1.55378	-1.21301	P63173	60S ribosomal protein L38	RPL38	11.569	11.3377	10.3929	10.7829	10.4788	10.5878	11.483	12.0828	13.4196	11.2994
	0.106134	-0.418528	Q59GN2;P62891	Putative 60S ribosomal protein L39-like 5;60S ribosomal protein L39	RPL39P5;RPL39	10.9498	11.9851	10.5351	14.9415	9.51036	10.7336	9.97323	10.1607	15.9784	11.3322
	0.0500734	0.0803172	P36578	60S ribosomal protein L4	RPL4	17.0513	17.4672	17.3963	17.9685	16.6611	16.0784	16.6628	16.2435	18.7331	16.4547
	1.08566	1.80601	P46777	60S ribosomal protein L5	RPL5	15.4176	14.7661	15.3391	13.953	13.5517	13.951	13.3986	10.5436	15.2254	11.5941
	0.0785087	0.0935423	Q02878	60S ribosomal protein L6	RPL6	16.93	16.9196	16.6955	17.1087	16.3227	16.1696	15.7268	16.2282	18.0101	16.4247
	0.332583	-0.405641	P18124	60S ribosomal protein L7	RPL7	17.0794	16.904	17.1159	18.4743	16.7404	16.715	17.1948	16.9153	19.1147	17.0838
	0.0805193	-0.108705	P62424	60S ribosomal protein L7a	RPL7A	17.0317	17.0669	17.0525	17.841	16.5932	16.5327	17.1592	15.9205	18.5546	16.879
	0.210261	-0.362012	P62917	60S ribosomal protein L8	RPL8	15.99	15.9322	16.112	16.4206	13.3012	15.1111	15.3829	15.2271	17.2314	15.518
	0.876294	-0.402302	P32969	60S ribosomal protein L9	RPL9	14.6082	15.0474	13.7406	14.7383	14.709	14.5659	14.6737	14.9752	15.2037	15.0295
	0.282248	-0.302058	P05388;Q8NHW5	60S acidic ribosomal protein P0;60S acidic ribosomal protein P0-like	RPLP0;RPLP0P6	16.417	16.2161	17.1596	15.3566	15.8261	17.0106	16.0518	17.0402	16.0068	17.4333
	0.179603	-0.367333	P05386	60S acidic ribosomal protein P1	RPLP1	14.7126	11.6229	14.4679	15.0926	15.552	15.9466	14.7278	15.0394	14.4281	15.5371
	1.35795	-2.5969	P05387	60S acidic ribosomal protein P2	RPLP2	9.58857	10.405	9.43741	9.98486	10.1644	14.1172	13.9359	13.8365	10.8814	14.1987
	0.374483	-0.266114	P04843	Dolichyl-diphosphooligosaccharide--protein glycosyltransferase subunit 1	RPN1	15.151	14.7531	14.8041	13.7294	15.2581	14.5528	14.4497	14.9874	15.2654	15.1943
	0.452521	-0.43444	P04844	Dolichyl-diphosphooligosaccharide--protein glycosyltransferase subunit 2	RPN2	11.3845	10.0869	11.8176	11.0498	10.3528	11.8797	11.2126	10.9128	11.9091	12.0841
	0.236262	0.386062	P78346	Ribonuclease P protein subunit p30	RPP30	12.8783	11.3447	12.6824	12.8632	10.0338	11.2901	12.3704	11.3441	11.7121	10.424
	0.960559	1.53157	Q9NQG5	Regulation of nuclear pre-mRNA domain-containing protein 1B	RPRD1B	13.8646	10.3268	14.0266	13.4082	13.9435	12.873	13.2174	10.7861	10.85	11.3154
	0.65968	0.788021	Q5VT52	Regulation of nuclear pre-mRNA domain-containing protein 2	RPRD2	11.8802	11.5442	12.6894	13.2647	10.4029	10.9643	10.1247	11.3521	11.2004	11.3345
	0.160714	0.16741	P46783	40S ribosomal protein S10	RPS10	16.1256	16.2612	15.094	15.7502	15.5762	15.3539	14.4887	15.4684	16.5635	15.5838
	0.0766681	-0.159349	P62280	40S ribosomal protein S11	RPS11	15.4291	12.6454	15.398	15.7613	15.2339	14.0716	13.9935	14.0125	16.3722	15.2855
	1.59415	-1.87704	P25398	40S ribosomal protein S12	RPS12	10.3964	13.1561	11.5009	10.0526	11.2065	9.80712	13.1349	12.0625	13.6731	12.7175
	0.138057	0.188674	P62277	40S ribosomal protein S13	RPS13	16.6712	16.7221	16.7212	17.4667	16.3239	15.8249	16.176	15.2104	17.9274	16.4181
	0.227669	-0.158128	P62263	40S ribosomal protein S14	RPS14	14.7006	14.5231	14.6266	13.9052	13.8243	13.9018	13.9137	14.0988	14.9572	14.6505
	0.348042	-0.425552	P62841	40S ribosomal protein S15	RPS15	10.2236	10.7213	11.2324	11.9919	10.2544	10.9663	11.7765	11.1642	12.4008	9.95398
	0.118963	-0.340446	P62244	40S ribosomal protein S15a	RPS15A	13.0854	12.9087	14.1555	14.4393	10.0135	13.8696	10.97	13.4709	15.0698	14.1658
	0.255411	0.171749	P62249	40S ribosomal protein S16	RPS16	16.4824	16.8148	17.2604	17.0481	16.8978	16.1809	16.2642	16.1345	17.1775	16.8599
	1.3636	-1.28759	P08708	40S ribosomal protein S17	RPS17	11.118	12.8069	12.7779	11.0705	11.7249	13.2874	12.7173	13.199	13.7335	14.0242
	0.0196472	-0.0108289	P62269	40S ribosomal protein S18	RPS18	16.3521	16.3729	16.5254	16.3848	16.3519	16.4403	15.8456	16.2571	16.9376	16.6213
	0.573669	0.472182	P39019	40S ribosomal protein S19	RPS19	15.6346	15.4903	16.037	15.3111	15.537	15.0846	13.8989	14.7236	15.724	15.8279
	0.274198	0.237261	P15880	40S ribosomal protein S2	RPS2	15.7211	15.6108	15.7995	15.0525	14.8835	15.2507	14.149	14.9362	15.888	15.6231
	1.33055	-1.77969	P60866	40S ribosomal protein S20	RPS20	11.3075	12.4809	14.2392	11.5159	14.2298	14.6006	15.0308	14.8595	14.6054	14.8723
	0.0377496	0.111102	P63220	40S ribosomal protein S21	RPS21	10.6317	13.1872	10.7576	13.4305	11.0385	9.85426	10.3613	10.7412	14.0369	10.3494
	0.20481	0.525778	P62266	40S ribosomal protein S23	RPS23	14.7288	13.7959	14.6226	15.2372	10.5354	13.5584	11.5119	13.8404	14.8207	12.7096
	0.0542438	-0.163319	P62847	40S ribosomal protein S24	RPS24	10.3384	14.2711	11.9204	14.0264	13.3939	13.1951	10.3285	12.9642	14.4484	14.3424
	0.0221474	0.0229961	P62851	40S ribosomal protein S25	RPS25	16.4636	16.4963	15.6057	16.8553	16.6347	16.2925	15.9963	16.6991	17.191	15.5868
	0.308318	0.576386	P62854;Q5JNZ5	40S ribosomal protein S26;Putative 40S ribosomal protein S26-like 1	RPS26;RPS26P11	14.0298	14.1804	13.9426	14.1402	13.8098	13.3746	10.4877	13.7783	15.1051	13.975
	0.139271	-0.274214	Q71UM5;P42677	40S ribosomal protein S27-like;40S ribosomal protein S27	RPS27L;RPS27	10.4448	11.4768	11.3409	13.3224	13.0743	12.4918	10.6739	12.6712	13.6653	12.1871
	0.464342	-0.181423	P23396	40S ribosomal protein S3	RPS3	16.4896	16.3778	16.6031	16.4391	16.4968	16.8123	16.1493	16.735	16.8748	17.1124
	0.530311	0.267517	P61247	40S ribosomal protein S3a	RPS3A	15.5857	15.24	15.7106	15.389	15.5991	15.6009	14.8682	14.6768	15.7047	15.7638
	0.126593	-0.123125	P62701	40S ribosomal protein S4, X isoform	RPS4X	16.6919	16.9392	16.3773	16.7482	16.5841	16.0654	15.9826	16.1073	17.8173	16.856
	0.273014	0.445451	P46782	40S ribosomal protein S5;40S ribosomal protein S5, N-terminally processed	RPS5	14.8635	16.0267	15.3164	14.0087	14.9373	15.6038	14.5958	15.6846	15.8217	12.6204
	0.158089	0.385982	P62753	40S ribosomal protein S6	RPS6	13.7106	13.9232	13.3429	9.96457	13.5476	13.1409	10.6953	13.4329	13.9366	12.1444
	0.255464	0.239199	P62081	40S ribosomal protein S7	RPS7	15.3782	15.2485	15.1823	14.7859	14.3044	14.6436	13.7789	14.2353	15.5851	15.1392
	0.284299	0.376867	P62241	40S ribosomal protein S8	RPS8	15.5976	15.8512	15.7084	15.8171	15.5703	15.2021	13.4173	15.6436	16.7393	15.1901
	0.724446	1.88687	P46781	40S ribosomal protein S9	RPS9	14.8736	14.9917	15.1377	16.2027	14.8059	14.423	10.0013	10.9681	16.789	14.9838
	0.578631	-0.527784	P08865	40S ribosomal protein SA	RPSA	16.1075	14.2987	16.4558	15.8311	16.0397	16.592	16.178	16.1213	16.6538	16.7081
	0.663884	0.772718	P23921	Ribonucleoside-diphosphate reductase large subunit	RRM1	9.47675	10.8527	12.2512	11.5077	12.1765	12.4155	10.7868	10.5935	10.6927	10.6229
	0.0436287	-0.0665593	Q5JTH9	RRP12-like protein	RRP12	12.6969	10.649	10.9865	10.4991	10.4204	11.4238	10.2415	11.4985	12.0679	10.9089
	1.30188	1.17063	Q96T23	Remodeling and spacing factor 1	RSF1	12.1529	11.4314	11.5271	12.3982	11.5919	10.2787	9.30239	11.0197	10.1055	11.1434
	0.521084	1.62828	O76021	Ribosomal L1 domain-containing protein 1	RSL1D1	16.4525	16.3778	16.1875	10.8355	15.8605	15.5503	10.0573	13.806	15.564	14.9023
	0.0593751	0.0847611	Q9BY42	Protein RTF2 homolog	RTFDC1	10.4851	9.93828	10.6329	11.4243	12.4056	10.5563	11.1563	10.0306	11.4574	10.6451
	1.51383	0.536301	Q9Y230	RuvB-like 2	RUVBL2	16.5941	16.3661	16.7219	16.5711	16.8631	16.1904	15.6657	15.9267	16.6115	15.8554
	1.12848	0.85216	P28702	Retinoic acid receptor RXR-beta	RXRB	12.2405	12.2549	12.6141	12.4738	12.0297	11.3417	10.2086	11.373	11.292	12.3542
	0.71711	0.51038	P60903	Protein S100-A10	S100A10	10.681	11.756	11.2981	11.4001	11.0583	12.0824	11.4535	11.1739	10.8694	9.97889
	1.88705	0.884843	P31949	Protein S100-A11;Protein S100-A11, N-terminally processed	S100A11	18.0733	17.3116	17.2344	17.4527	17.97	17.9008	16.3296	16.6021	17.5271	16.6303
	1.32948	1.44718	Q96FQ6	Protein S100-A16	S100A16	12.9731	13.2889	12.3995	12.4118	12.7896	12.5755	12.1315	10.8554	12.7813	9.40206
	1.37372	0.961301	P26447	Protein S100-A4	S100A4	18.5071	18.2921	17.957	18.9318	18.9282	17.8192	17.4463	17.1089	18.5496	16.6736
	0.756855	1.17507	P06703	Protein S100-A6	S100A6	14.3759	13.1729	11.6095	13.9932	14.4269	15.8026	13.1909	12.3496	11.7512	13.5955
	1.50927	-0.970669	P31151	Protein S100-A7	S100A7	9.8112	10.1543	11.0279	11.7662	10.5218	10.4377	11.7683	11.5591	11.8419	11.1927
	0.283612	-0.741295	P05109	Protein S100-A8;Protein S100-A8, N-terminally processed	S100A8	13.0448	13.5292	17.4492	13.2981	11.5123	13.7091	16.0545	14.5272	14.0498	13.3621
	0.437742	-1.55	P06702	Protein S100-A9	S100A9	14.8683	15.4942	19.2476	12.872	10.3046	15.385	18.1766	15.8757	14.9887	15.9402
	0.678392	1.22189	P25815	Protein S100-P	S100P	12.8706	13.3725	9.68475	14.0424	13.6512	13.4265	12.5122	10.7765	12.3726	10.8164
	0.490493	0.778063	Q9UBE0	SUMO-activating enzyme subunit 1;SUMO-activating enzyme subunit 1, N-terminally processed	SAE1	10.8878	11.7258	11.0404	13.7022	13.1645	10.0552	11.5366	10.5809	10.7118	11.1091
	0.386683	0.797929	Q15424;Q14151	Scaffold attachment factor B1;Scaffold attachment factor B2	SAFB;SAFB2	13.2971	10.1849	13.2393	13.2874	14.0244	12.6939	10.5973	11.1508	14.119	12.0925
	0.107063	-0.183707	Q6SPF0	Atherin	SAMD1	10.2203	11.3873	11.2235	12.623	11.7218	10.6364	9.68516	12.0641	12.056	12.1377
	0.888489	1.45608	Q9NR31;Q9Y6B6	GTP-binding protein SAR1a;GTP-binding protein SAR1b	SAR1A;SAR1B	10.3694	12.653	13.0399	13.7606	13.7521	12.6504	9.27116	12.6809	11.933	11.1076
	0.755541	-0.914157	Q9NP81	Serine--tRNA ligase, mitochondrial	SARS2	10.3386	10.4198	11.3089	10.9109	9.28652	12.086	11.5368	12.8326	11.684	10.5036
	1.26793	1.87929	Q9Y3A5	Ribosome maturation protein SBDS	SBDS	13.746	13.2674	12.8596	14.396	14.4788	10.6449	10.7945	10.3841	11.4504	12.7822
	1.27544	1.15867	A3KN83	Protein strawberry notch homolog 1	SBNO1	12.5136	10.6515	10.7447	12.6414	12.7366	12.3819	11.2141	10.542	10.6207	10.7684
	0.19145	-0.55261	Q6UWP8	Suprabasin	SBSN	10.1433	12.7589	11.344	9.72684	10.2063	11.0469	10.8309	14.8794	11.1894	8.79484
	0.0255888	-0.0608857	Q99590	Protein SCAF11	SCAF11	9.6376	11.1234	9.77039	10.5934	13.2149	10.951	9.24362	12.0893	10.8654	11.5724
	0.823605	-2.44884	Q01118	Sodium channel protein type 7 subunit alpha	SCN7A	14.4209	14.2731	10.5527	10.8299	13.3028	16.6903	15.6976	16.9542	12.4168	18.1066
	0.0662248	-0.0555863	P31040	Succinate dehydrogenase [ubiquinone] flavoprotein subunit, mitochondrial	SDHA	19.1523	19.0407	18.8387	18.3605	18.8536	19.8899	19.6074	19.1068	18.6491	18.9495
	0.0571608	-0.1264	P21912	Succinate dehydrogenase [ubiquinone] iron-sulfur subunit, mitochondrial	SDHB	16.2114	15.4394	16.1874	13.0258	15.9178	16.3384	17.0462	15.0639	14.4201	16.0555
	0.756931	-0.597517	Q9NRG7	Epimerase family protein SDR39U1	SDR39U1	10.9043	9.62898	11.136	10.9516	10.2491	11.3099	11.6752	11.6684	11.4202	10.4129
	0.186163	-0.190281	O75396	Vesicle-trafficking protein SEC22b	SEC22B	10.6514	11.1873	10.5928	11.1927	10.8988	11.8355	12.1999	10.4128	10.6935	11.6939
	0.457211	-0.558443	P53992	Protein transport protein Sec24C	SEC24C	9.5591	10.3917	10.4692	10.8915	9.94931	11.4695	9.69997	10.7728	11.1672	12.4139
	0.00713458	-0.0229717	P61619	Protein transport protein Sec61 subunit alpha isoform 1	SEC61A1	13.0643	13.4887	13.7638	13.2601	13.9922	8.60199	13.5018	12.4043	11.6658	13.3008
	0.726266	-0.497742	P60468	Protein transport protein Sec61 subunit beta	SEC61B	10.5089	9.40237	10.2763	11.1436	10.3693	9.64764	10.8574	10.6451	10.2999	11.0873
	0.274395	-0.353941	P49903	Selenide, water dikinase 1	SEPHS1	9.93574	10.2604	10.9118	10.1377	10.1074	11.2712	10.0006	10.9668	12.3991	9.79868
	0.0946833	0.105982	Q8NC51	Plasminogen activator inhibitor 1 RNA-binding protein	SERBP1	11.1456	11.4783	11.0437	9.96411	11.501	9.7387	10.5888	11.0917	10.3194	10.8238
	0.97916	1.23099	P30740	Leukocyte elastase inhibitor	SERPINB1	14.5811	14.1631	14.3591	14.1988	14.3283	14.358	14.1129	13.6273	14.0782	10.5833
	0.466357	-1.27827	Q96P63	Serpin B12	SERPINB12	10.8798	11.5319	13.9345	9.73676	10.4988	13.3425	14.0119	14.3998	9.37125	13.9463
	0.723872	1.46179	P29508	Serpin B3	SERPINB3	15.4905	13.0735	15.5855	11.3353	13.6007	15.4557	12.7134	13.1015	10.8365	13.8623
	0.099743	-0.170634	P48594	Serpin B4	SERPINB4	11.4731	12.0755	11.2844	9.87891	9.74624	12.6299	11.0707	11.2769	10.885	12.1754
	1.30869	2.01846	P36952	Serpin B5	SERPINB5	13.3813	13.9329	13.989	14.408	13.9259	10.6986	10.8461	10.5849	13.3667	10.6855
	0.867551	1.57404	P35237	Serpin B6	SERPINB6	14.5604	14.5118	11.9846	14.8032	15.0204	14.1958	12.0377	13.6245	14.5758	10.1832
	0.669853	0.841009	P50452	Serpin B8	SERPINB8	11.9522	11.2744	10.1564	12.0976	9.97078	12.1403	9.36931	9.92702	11.047	11.3538
	0.386268	0.646525	P50454	Serpin H1	SERPINH1	13.749	13.8182	13.0863	10.528	13.6629	14.4471	12.4818	12.8505	13.1613	11.7812
	1.37585	1.79435	Q15047	Histone-lysine N-methyltransferase SETDB1	SETDB1	12.5043	11.3957	13.5548	12.6193	11.8822	14.3679	10.0285	12.4439	11.4415	9.7915
	1.55356	2.48019	Q15459	Splicing factor 3A subunit 1	SF3A1	15.3685	14.1129	15.3952	16.396	16.3671	15.0283	11.0445	11.428	15.2931	14.0922
	0.0423621	-0.054194	Q15427	Splicing factor 3B subunit 4	SF3B4	10.6547	10.8442	10.5539	10.473	11.7575	10.9238	11.4507	9.59304	10.8624	11.782
	0.936106	0.437321	P31947	14-3-3 protein sigma	SFN	15.0869	13.9767	14.6253	15.0261	15.2407	14.9389	14.1633	14.5835	14.2443	14.5228
	0.770107	0.361669	P23246	Splicing factor, proline- and glutamine-rich	SFPQ	18.6385	18.5822	18.6148	17.7157	18.9243	18.0933	17.8208	18.1312	18.3206	17.9933
	0.21659	0.171962	Q9H9B4	Sideroflexin-1	SFXN1	11.1254	11.1425	10.8868	11.3256	11.0501	10.5336	9.96185	11.4011	10.5081	11.4839
	0.0285402	-0.0652804	Q9BWM7	Sideroflexin-3	SFXN3	10.6058	10.2494	10.3019	11.2902	9.94051	13.1221	12.4901	10.5196	11.5021	9.42251
	0.518612	-0.359438	P34897	Serine hydroxymethyltransferase, mitochondrial	SHMT2	20.2437	20.1674	20.1169	19.4863	19.9898	21.1516	20.9671	20.5448	19.9465	20.7498
	1.5009	-1.75188	Q8TF72	Protein Shroom3	SHROOM3	15.432	16.5266	16.1519	14.9146	15.5466	13.6986	17.2593	16.5402	16.0855	18.6361
	1.52935	1.81125	Q96ST3	Paired amphipathic helix protein Sin3a	SIN3A	13.1831	13.4821	11.1837	11.654	14.1029	13.0539	10.2057	10.1625	12.1176	11.3756
	0.193062	1.24065	P12755	Ski oncogene	SKI	18.1514	21.6691	18.7002	16.7464	9.65164	15.2528	14.3468	10.5688	18.8629	18.0399
	0.944437	-1.61467	P53007	Tricarboxylate transport protein, mitochondrial	SLC25A1	13.9611	10.4308	11.7003	11.125	9.84924	13.9801	13.0853	13.8657	13.4916	13.3803
	0.521143	-0.690296	Q9UBX3	Mitochondrial dicarboxylate carrier	SLC25A10	11.5764	11.7665	11.8169	11.5117	10.5335	12.412	12.4848	11.9704	10.7063	14.0111
	0.248136	0.541461	Q9UJS0	Calcium-binding mitochondrial carrier protein Aralar2	SLC25A13	15.6769	13.7912	14.5713	12.6455	13.2471	16.1014	15.3477	13.4277	11.9702	14.4442
	0.0602363	0.0977201	Q9H936;Q9H1K4	Mitochondrial glutamate carrier 1;Mitochondrial glutamate carrier 2	SLC25A22;SLC25A18	10.2358	11.0424	11.0866	10.7593	11.4322	11.0586	9.15899	12.3996	11.3375	10.4563
	0.42055	-0.862573	Q6NUK1	Calcium-binding mitochondrial carrier protein SCaMC-1	SLC25A24	13.8206	11.4506	11.4185	11.3905	13.8936	15.2114	14.4968	13.8802	12.3324	14.1977
	0.1402	-0.229284	Q00325	Phosphate carrier protein, mitochondrial	SLC25A3	15.7952	15.7118	15.2054	13.1962	15.4197	16.1561	15.7334	16.0297	14.2751	15.8684
	0.1787	0.286173	P12235	ADP/ATP translocase 1	SLC25A4	11.0262	11.3652	10.4025	11.2449	9.87907	13.0419	9.71709	11.2915	11.4137	11.0728
	0.351014	-0.219277	P05141	ADP/ATP translocase 2;ADP/ATP translocase 2, N-terminally processed	SLC25A5	17.367	17.9999	17.948	17.0829	17.6127	18.3133	18.2256	18.0401	17.3975	18.0965
	0.0258009	0.023681	P12236	ADP/ATP translocase 3;ADP/ATP translocase 3, N-terminally processed	SLC25A6	19.4869	19.6046	19.3075	18.5623	19.3352	19.8623	19.8102	19.237	18.5746	19.7227
	0.140607	-0.162335	O14975	Very long-chain acyl-CoA synthetase	SLC27A2	11.4269	12.1151	10.976	10.4313	10.5312	10.1273	10.9742	10.8605	11.9562	10.5969
	0.12131	-0.531746	Q8IY50	Putative thiamine transporter SLC35F3	SLC35F3	11.1511	15.6293	10.2935	10.6681	15.8898	15.2175	13.6752	10.7907	16.5138	13.7135
	1.16555	1.72688	Q9BWU0	Kanadaptin	SLC4A1AP	13.7789	13.4019	13.1273	13.9693	13.7305	9.93672	11.6182	11.9247	11.0664	10.4463
	1.34798	1.26878	Q7Z7L1;Q68D06	Schlafen family member 11;Schlafen family member 13	SLFN11;SLFN13	12.43	11.2772	10.679	13.2696	12.9149	11.2829	10.4858	10.7512	10.7957	10.7945
	0.0613203	0.200337	Q9GZT3	SRA stem-loop-interacting RNA-binding protein, mitochondrial	SLIRP	11.2221	14.7382	14.4717	14.2317	14.2536	15.8889	15.4908	14.4686	10.7279	15.0489
	0.110913	0.239567	P51531	Probable global transcription activator SNF2L2	SMARCA2	10.0402	9.67116	10.4364	11.8406	13.7363	10.658	10.0186	11.3995	11.3011	10.5777
	1.46911	3.06877	P51532	Transcription activator BRG1	SMARCA4	14.8904	14.6821	13.7064	10.4892	15.4423	10.6299	10.281	10.9804	8.69824	10.9921
	0.0138642	-0.0115574	Q969G3	SWI/SNF-related matrix-associated actin-dependent regulator of chromatin subfamily E member 1	SMARCE1	11.5466	10.5034	11.0174	11.2939	10.983	10.349	10.702	10.5601	11.1049	11.4748
	1.57142	1.73938	O95347	Structural maintenance of chromosomes protein 2	SMC2	15.6526	16.1375	14.8864	16.3681	16.0184	14.0512	14.7584	12.1367	13.8564	14.3671
	0.141694	0.206264	Q6IN85	Serine/threonine-protein phosphatase 4 regulatory subunit 3A	SMEK1	11.5497	11.3934	11.1194	11.3439	11.4554	11.7391	10.3819	9.75741	12.72	12.0496
	0.53101	-1.3732	P53814	Smoothelin	SMTN	9.33403	9.76791	10.1429	11.4398	10.4905	14.1765	11.0659	11.7895	10.8448	15.3603
	1.58688	1.9915	Q2TAY7	WD40 repeat-containing protein SMU1;WD40 repeat-containing protein SMU1, N-terminally processed	SMU1	13.8044	13.5645	13.2299	14.2312	13.827	13.0718	11.645	10.6225	14.1025	10.1499
	0.263841	-0.613457	Q7KZF4	Staphylococcal nuclease domain-containing protein 1	SND1	10.0373	10.7339	13.1683	11.9635	13.1042	13.0178	13.3276	13.3467	10.039	13.7573
	0.902788	2.10258	P09012	U1 small nuclear ribonucleoprotein A	SNRPA	15.1443	14.827	14.8465	15.0859	15.4322	10.7727	13.1113	9.44693	12.0271	14.4101
	1.25763	1.71967	P09661	U2 small nuclear ribonucleoprotein A	SNRPA1	15.1365	14.9299	15.1654	15.4063	15.2916	15.0659	10.739	13.4103	14.9953	14.6404
	0.0201918	-0.0374038	P08579	U2 small nuclear ribonucleoprotein B	SNRPB2	11.3007	9.07396	10.7813	11.2933	8.86402	11.0066	9.52882	11.272	10.363	10.5324
	0.0846387	0.121689	P09234	U1 small nuclear ribonucleoprotein C	SNRPC	11.5597	12.0105	12.3056	10.2375	11.301	10.4924	12.296	10.386	11.2028	10.8995
	1.85935	0.791369	P62314	Small nuclear ribonucleoprotein Sm D1	SNRPD1	16.1138	15.4846	16.2265	15.4544	15.6184	15.6579	14.4554	15.4891	14.6958	15.2313
	0.579395	0.436487	P62316	Small nuclear ribonucleoprotein Sm D2	SNRPD2	15.2222	14.7333	14.7749	14.3526	15.435	13.8231	13.856	14.1134	15.0494	14.1292
	1.16775	1.2191	P62318	Small nuclear ribonucleoprotein Sm D3	SNRPD3	16.9563	16.7719	16.917	16.6707	16.8158	15.1582	13.6494	15.4644	16.1726	16.0305
	1.88698	0.854777	P62304	Small nuclear ribonucleoprotein E	SNRPE	16.1791	16.1467	16.1141	15.4446	16.1183	15.6396	14.4327	15.0225	15.7613	15.126
	0.89434	1.53778	P62308;A8MWD9	Small nuclear ribonucleoprotein G;Putative small nuclear ribonucleoprotein G-like protein 15	SNRPG;SNRPGP15	10.2169	10.8663	13.9563	13.6027	13.8141	10.7318	10.3125	10.9012	10.7265	10.7007
	1.70999	1.22992	P63162;P14678	Small nuclear ribonucleoprotein-associated protein N;Small nuclear ribonucleoprotein-associated proteins B and B	SNRPN;SNRPB	17.3527	17.4794	17.3517	16.3248	17.252	15.9177	14.9442	15.5908	16.5232	15.8077
	0.257372	-0.486318	P04179	Superoxide dismutase [Mn], mitochondrial	SOD2	18.7204	17.1913	16.9815	16.2904	17.3652	19.1602	19.6414	17.8634	16.3233	18.5898
	1.35902	0.959331	Q00796	Sorbitol dehydrogenase	SORD	15.3354	15.0625	14.55	15.0501	15.1512	14.8675	12.6357	14.7126	14.2998	14.5256
	0.160687	0.188287	P08047	Transcription factor Sp1	SP1	10.6005	11.6337	10.9953	10.8954	10.1975	9.68183	10.8541	9.85062	11.361	9.85059
	0.0607554	-0.100992	O75391	Sperm-associated antigen 7	SPAG7	11.565	9.34957	11.0261	10.5726	12.5103	10.4086	10.6194	10.6162	11.8375	10.9523
	0.211216	0.463817	P35270	Sepiapterin reductase	SPR	14.1645	14.1238	14.2253	10.7859	14.2383	14.8953	13.4531	13.9869	11.5515	14.1085
	0.170753	0.657745	Q9UBC9	Small proline-rich protein 3	SPRR3	11.9533	10.5138	17.5138	9.60928	10.8903	10.2524	11.0255	10.9845	10.4073	12.107
	0.549909	-1.14896	Q8WW59	SPRY domain-containing protein 4	SPRYD4	11.1843	9.90155	9.03548	10.3367	10.2668	13.9038	13.8226	11.2468	11.3999	11.2123
	0.750699	0.937177	Q13813	Spectrin alpha chain, non-erythrocytic 1	SPTAN1	12.399	10.6587	12.161	10.2338	12.0499	10.7387	9.13255	11.0604	11.5015	10.0508
	0.527161	2.1684	Q01082	Spectrin beta chain, non-erythrocytic 1	SPTBN1	16.7607	17.3165	17.1494	10.599	16.2455	16.3848	15.9916	10.0861	17.3779	10.8414
	0.593786	-1.17078	Q9Y6N5	Sulfide:quinone oxidoreductase, mitochondrial	SQRDL	13.2535	10.8949	12.4857	11.0289	12.9904	14.4722	14.4101	14.3244	11.252	14.7803
	0.0439369	-0.134971	Q8N5C6	S1 RNA-binding domain-containing protein 1	SRBD1	14.2672	12.2872	10.1737	10.5057	10.8695	8.4999	12.5224	11.343	10.9631	10.1136
	0.312344	0.463799	Q6ZRS2	Helicase SRCAP	SRCAP	12.7505	11.7013	11.8245	11.5621	9.67	10.8902	9.7033	11.8321	11.2295	10.979
	1.44223	2.0384	P30626	Sorcin	SRI	13.8001	13.7688	13.4766	13.962	14.1562	13.1187	9.57108	10.39	13.6106	13.1297
	0.222766	-0.46665	P19623	Spermidine synthase	SRM	12.2594	10.2626	12.4823	12.3322	10.5368	8.44131	11.3846	12.2661	10.8136	11.6121
	0.387175	1.03609	P49458	Signal recognition particle 9 kDa protein	SRP9	11.4021	15.3706	15.2088	14.2793	14.8835	14.252	9.74076	15.0132	14.071	13.9615
	0.153518	0.208716	Q9UQ35	Serine/arginine repetitive matrix protein 2	SRRM2	11.9255	10.946	11.9153	10.7315	12.1035	11.8511	10.5848	11.782	10.3804	12.7332
	0.892213	1.72237	Q07955	Serine/arginine-rich splicing factor 1	SRSF1	13.688	10.0526	13.061	10.9838	13.8025	13.6375	10.8292	9.73379	12.9374	9.76044
	0.540749	0.804696	O75494	Serine/arginine-rich splicing factor 10	SRSF10	11.8928	12.474	9.50897	12.2915	11.4699	12.2309	9.76434	11.6327	11.894	10.069
	0.262572	-0.458171	Q01130;Q9BRL6	Serine/arginine-rich splicing factor 2;Serine/arginine-rich splicing factor 8	SRSF2;SRSF8	13.425	10.095	13.496	13.8761	13.3514	13.1901	13.1273	13.0013	13.8224	13.5041
	0.713142	0.763948	P84103	Serine/arginine-rich splicing factor 3	SRSF3	13.8424	14.3235	13.9589	14.7638	13.8258	14.2923	13.752	14.3791	11.527	13.9573
	1.24941	0.611637	Q13247;Q13243;Q08170	Serine/arginine-rich splicing factor 6;Serine/arginine-rich splicing factor 5;Serine/arginine-rich splicing factor 4	SRSF6;SRSF5;SRSF4	15.2628	14.6891	14.9441	14.4934	15.5009	14.9531	13.6471	14.3654	14.769	14.6675
	0.334543	0.321435	Q16629	Serine/arginine-rich splicing factor 7	SRSF7	14.6291	13.8475	13.7993	14.9725	14.6267	14.2894	12.9657	13.9566	15.0694	14.1656
	0.507049	-0.533531	Q13242	Serine/arginine-rich splicing factor 9	SRSF9	11.9024	10.8862	12.3368	10.5401	11.1026	11.1981	11.1844	12.8735	12.3662	11.0207
	0.0878087	-0.197445	Q04837	Single-stranded DNA-binding protein, mitochondrial	SSBP1	15.7776	15.5128	15.6648	14.8915	15.0428	17.6527	16.9575	16.4922	13.4996	16.8686
	0.416362	0.729695	P43307	Translocon-associated protein subunit alpha	SSR1	11.1695	11.0696	13.0507	11.0528	11.3339	13.3864	9.96507	13.226	10.6533	10.6121
	1.16503	-1.79441	P51571	Translocon-associated protein subunit delta	SSR4	10.0155	12.7695	13.3788	12.792	9.9563	10.3027	13.3825	12.4478	13.7293	13.7613
	0.0624874	0.0997342	Q8IZP2;Q8NFI4;P50502	Putative protein FAM10A4;Putative protein FAM10A5;Hsc70-interacting protein	ST13P4;ST13P5;ST13	12.8029	9.94449	11.9744	10.7889	10.952	10.1617	11.1265	11.3075	10.5757	11.0075
	0.0576708	-0.0731304	P51692;P42229	Signal transducer and activator of transcription 5B;Signal transducer and activator of transcription 5A	STAT5B;STAT5A	10.2258	11.7694	11.4351	10.3994	11.6319	9.85979	10.387	11.0081	11.4471	10.9978
	0.973857	0.883152	P31948	Stress-induced-phosphoprotein 1	STIP1	16.8778	16.6004	16.6274	16.9474	17.4313	16.7031	14.3418	16.3769	17.062	16.145
	0.134295	0.310746	P16949;Q93045	Stathmin;Stathmin-2	STMN1;STMN2	11.1214	11.6304	9.81877	12.9428	13.8836	12.5962	10.5907	11.047	13.3904	11.7244
	0.0195174	0.0364095	P27105	Erythrocyte band 7 integral membrane protein	STOM	9.50861	11.765	10.6834	10.8789	11.3994	11.8903	10.8264	9.64232	11.011	12.4585
	0.0507712	-0.178827	Q9UJZ1	Stomatin-like protein 2, mitochondrial	STOML2	14.4209	14.3733	14.6874	12.5593	13.0286	16.6862	15.9433	15.6015	10.6604	15.6806
	0.688436	1.25588	Q9Y3F4	Serine-threonine kinase receptor-associated protein	STRAP	12.3383	11.2028	11.2748	10.8461	14.8686	10.045	9.86234	10.1355	11.5202	10.509
	1.23564	0.807235	Q9UNE7	E3 ubiquitin-protein ligase CHIP	STUB1	11.1128	10.3706	12.0146	11.6748	10.9566	11.849	10.2273	10.8765	10.0546	10.9316
	0.462942	1.1081	Q9P2R7	Succinyl-CoA ligase [ADP-forming] subunit beta, mitochondrial	SUCLA2	15.3926	14.0624	15.2651	14.8837	14.6929	16.6246	16.5006	13.0144	10.9318	15.7349
	0.701242	-0.602708	P53597	Succinyl-CoA ligase [ADP/GDP-forming] subunit alpha, mitochondrial	SUCLG1	14.3841	13.5308	14.0094	13.9526	13.5961	15.083	15.8141	13.9327	14.5671	14.4675
	0.390478	-1.29253	Q96I99	Succinyl-CoA ligase [GDP-forming] subunit beta, mitochondrial	SUCLG2	15.8652	14.425	11.112	13.1695	11.3391	17.505	17.5301	14.0899	13.4756	15.6852
	0.0312204	0.0338043	Q9Y2Z0	Suppressor of G2 allele of SKP1 homolog	SUGT1	11.0812	10.693	10.2451	11.5308	11.5195	12.1432	10.7768	11.6476	10.9687	11.2801
	1.29355	2.50822	P63165;G2XKQ0	Small ubiquitin-related modifier 1;Small ubiquitin-related modifier	SUMO1	16.2665	16.3249	16.7824	15.5441	15.939	15.5066	9.68909	13.9028	15.8061	14.8115
	1.46794	1.52481	P61956;Q6EEV6;P55854	Small ubiquitin-related modifier 2;Small ubiquitin-related modifier 4;Small ubiquitin-related modifier 3	SUMO2;SUMO4;SUMO3	18.1295	18.3904	18.2854	18.2329	18.4456	17.8994	14.7371	17.6765	18.0237	16.3856
	0.00027084	0.000464439	O00267	Transcription elongation factor SPT5	SUPT5H	10.6717	10.7876	10.2512	12.3105	12.0805	9.65669	11.1874	11.6291	10.7052	10.3152
	0.948807	1.52854	Q7KZ85	Transcription elongation factor SPT6	SUPT6H	13.2819	11.2557	11.096	13.7037	14.1285	10.258	10.0951	10.3923	11.1602	11.3874
	0.157475	-0.515589	Q8IYB8	ATP-dependent RNA helicase SUPV3L1, mitochondrial	SUPV3L1	15.3388	14.8213	13.3552	10.1703	14.481	16.8906	15.8972	14.5447	12.9211	15.4042
	0.786564	-1.14175	O15260	Surfeit locus protein 4	SURF4	14.3823	13.8744	13.6739	14.3947	13.4211	10.6713	14.205	14.3468	15.375	14.252
	0.561077	0.68751	O60506	Heterogeneous nuclear ribonucleoprotein Q	SYNCRIP	14.3926	14.3807	14.2555	14.3963	14.2915	14.3031	13.9353	11.4767	14.6331	14.5513
	0.342646	-0.683659	Q9UMZ2	Synergin gamma	SYNRG	10.5922	10.6878	11.2099	10.6797	11.6244	9.30773	10.0537	10.5948	10.5462	14.2745
	1.0226	1.64748	Q9BSH4	Translational activator of cytochrome c oxidase 1	TACO1	13.445	13.3794	13.3856	10.2999	10.7703	13.6453	9.54397	11.8804	11.2397	10.6963
	0.230596	-0.272612	P49848	Transcription initiation factor TFIID subunit 6	TAF6	9.80972	11.226	10.083	10.7578	9.36879	9.41912	10.225	11.1735	10.7193	9.41567
	1.06907	1.74993	P37837	Transaldolase	TALDO1	13.8731	13.5537	9.43892	13.7783	13.7422	13.5358	11.4219	11.2986	11.1363	11.0915
	1.17128	-1.77349	Q96BW9	Phosphatidate cytidylyltransferase, mitochondrial	TAMM41	10.2111	10.7331	9.8622	11.1909	10.157	13.8508	13.3197	12.9595	11.3974	13.4207
	0.367403	0.67544	P26639	Threonine--tRNA ligase, cytoplasmic	TARS	13.1934	10.9838	10.8714	13.5258	13.3965	13.444	11.4399	11.5101	13.6866	10.9382
	0.27815	0.943497	Q9BW92	Threonine--tRNA ligase, mitochondrial	TARS2	16.7571	16.8871	16.6774	15.5685	16.3196	18.2198	17.1372	17.4915	10.6677	17.8826
	0.0215487	0.0733651	Q9BZK7;O60907	F-box-like/WD repeat-containing protein TBL1XR1;F-box-like/WD repeat-containing protein TBL1X	TBL1XR1;TBL1X	10.252	11.9293	11.4497	14.5859	14.0965	10.0883	10.2939	11.9482	14.2543	11.478
	1.17431	1.30808	Q12788	Transducin beta-like protein 3	TBL3	13.4737	13.1642	13.8542	13.6353	14.0236	13.4444	12.3945	14.381	11.3655	11.0235
	0.430472	1.16421	Q969Z0	Protein TBRG4	TBRG4	14.3582	14.7796	14.3004	11.1982	13.7509	15.464	15.099	12.0168	9.70519	14.423
	1.40067	2.70228	P23193	Transcription elongation factor A protein 1	TCEA1	14.2915	9.19681	13.3224	13.7127	14.4965	14.3443	9.55899	10.9539	11.6763	9.91111
	0.10866	-0.143897	Q15369	Transcription elongation factor B polypeptide 1	TCEB1	11.2087	10.9	10.3465	10.171	11.9588	10.7469	10.4569	11.0203	12.3566	10.2964
	0.35497	0.591293	Q15370	Transcription elongation factor B polypeptide 2	TCEB2	13.2261	11.3227	12.7992	9.96312	10.6931	10.2663	10.8288	9.93411	11.0537	11.3319
	0.261053	-0.384386	Q9UGU0	Transcription factor 20	TCF20	10.7102	10.166	10.5732	10.3707	9.63673	12.042	9.64614	11.8084	12.0418	10.3738
	1.51139	1.77593	Q13428	Treacle protein	TCOF1	15.2322	12.9863	13.8887	13.8963	14.6173	13.1272	13.4007	10.7591	11.3868	13.1818
	0.97842	1.01499	P28347;Q15561;Q99594;Q15562	Transcriptional enhancer factor TEF-1;Transcriptional enhancer factor TEF-3;Transcriptional enhancer factor TEF-5;Transcriptional enhancer factor TEF-4	TEAD1;TEAD4;TEAD3;TEAD2	12.2672	11.195	12.7548	11.0862	12.6088	10.8171	9.85297	11.0193	10.3469	11.8736
	0.356145	-0.447729	Q9NZ01	Very-long-chain enoyl-CoA reductase	TECR	12.8007	13.7932	13.5488	12.6318	13.2595	11.9579	12.0317	13.68	14.6806	13.3933
	1.28736	1.21088	Q96QE5	Transcription elongation factor, mitochondrial	TEFM	13.3834	11.5435	11.5533	11.5415	10.9935	10.7701	9.67688	10.6693	10.2135	11.1204
	0.0872485	-0.167454	Q9NXF1	Testis-expressed sequence 10 protein	TEX10	12.9398	10.0847	10.0997	12.4928	10.9875	10.744	10.4334	11.0372	12.3718	11.7265
	0.366838	-0.348089	Q00059	Transcription factor A, mitochondrial	TFAM	15.8188	15.9678	15.3306	15.1943	16.0209	17.1601	16.4309	16.6413	15.439	16.5429
	0.651465	-0.698289	P05549;Q6VUC0;Q92481	Transcription factor AP-2-alpha;Transcription factor AP-2-epsilon;Transcription factor AP-2-beta	TFAP2A;TFAP2E;TFAP2B	11.5587	11.6851	11.1428	10.2901	10.1323	9.83456	10.9622	12.0408	12.3572	10.5287
	0.0209187	-0.0402756	Q7Z6R9;Q92754	Transcription factor AP-2-delta;Transcription factor AP-2 gamma	TFAP2D;TFAP2C	9.41689	9.75939	11.8978	11.9885	10.6752	9.89165	9.40049	11.3167	10.8266	11.0369
	0.194724	0.337117	Q01664	Transcription factor AP-4	TFAP4	12.3566	11.2184	10.5766	11.3432	11.4867	10.4723	10.3285	10.8993	12.9732	9.41974
	1.06964	1.03674	Q8WVM0	Dimethyladenosine transferase 1, mitochondrial	TFB1M	9.79263	10.7151	11.5676	11.5359	11.0268	12.3334	10.1964	10.679	10.546	9.07935
	0.0316956	-0.0414623	Q9H5Q4	Dimethyladenosine transferase 2, mitochondrial	TFB2M	11.0171	12.4282	11.3093	10.7998	10.9508	12.3994	11.0033	12.4617	11.3819	11.2553
	0.200764	0.73619	P02786	Transferrin receptor protein 1;Transferrin receptor protein 1, serum form	TFRC	10.0589	10.6413	14.614	14.5201	13.2512	14.5328	13.7357	10.8798	14.9044	9.28079
	0.400351	-0.327983	P21980	Protein-glutamine gamma-glutamyltransferase 2	TGM2	9.58461	10.9528	11.0197	10.783	10.2353	10.584	10.3615	10.5553	10.7629	11.7385
	0.0613219	-0.160923	Q08188	Protein-glutamine gamma-glutamyltransferase E;Protein-glutamine gamma-glutamyltransferase E 50 kDa catalytic chain;Protein-glutamine gamma-glutamyltransferase E 27 kDa non-catalytic chain	TGM3	12.1708	14.0537	12.4195	10.954	10.5771	11.1193	13.3922	13.6435	10.5916	10.546
	0.042642	0.128173	Q8IYQ7	Threonine synthase-like 1	THNSL1	10.2094	13.6076	12.0773	12.222	10.4113	13.3081	12.8404	13.3284	12.2026	9.00635
	0.767766	1.02593	Q86W42	THO complex subunit 6 homolog	THOC6	12.9008	12.3443	13.4131	12.6775	10.0001	10.8652	10.8406	11.091	11.3774	10.7212
	1.25814	1.76642	Q9Y2W1	Thyroid hormone receptor-associated protein 3	THRAP3	13.9547	11.3075	13.312	11.4249	14.7217	12.1609	10.1752	11.685	10.4926	11.8359
	0.851628	1.46221	Q9NXG2	THUMP domain-containing protein 1	THUMPD1	12.9526	12.3936	13.0877	13.3946	13.6072	9.29424	9.68207	11.4548	11.0889	11.7454
	1.30059	1.27355	Q01085;P31483	Nucleolysin TIAR;Nucleolysin TIA-1 isoform p40	TIAL1;TIA1	12.4916	10.798	10.7954	12.1696	12.478	12.0419	9.11278	11.0069	11.1639	10.8052
	0.216842	-0.189348	Q9Y5L4	Mitochondrial import inner membrane translocase subunit Tim13	TIMM13	10.8016	11.5722	10.3918	11.9555	10.7807	10.2386	11.0237	11.2428	10.9234	11.3944
	0.0751917	0.206558	O43615	Mitochondrial import inner membrane translocase subunit TIM44	TIMM44	14.7973	13.6767	14.081	11.6354	13.9822	17.0766	14.9587	13.716	12.5905	14.7414
	0.0291185	0.0639523	Q3ZCQ8	Mitochondrial import inner membrane translocase subunit TIM50	TIMM50	13.6046	11.4116	12.6281	12.4787	9.9184	13.6214	13.0161	12.0947	12.1879	11.554
	0.102815	0.136851	Q9BVW5	TIMELESS-interacting protein	TIPIN	11.3188	10.0781	10.5965	12.046	11.7779	10.6929	10.4766	11.9628	11.146	10.2072
	0.231153	0.401887	Q04726;Q04725;Q04724;Q04727	Transducin-like enhancer protein 3;Transducin-like enhancer protein 2;Transducin-like enhancer protein 1;Transducin-like enhancer protein 4	TLE3;TLE2;TLE1;TLE4	10.5296	11.5224	12.7225	10.4874	9.84004	11.9764	9.74715	10.8974	12.324	10.1428
	0.0576262	-0.0672673	Q9UKI8	Serine/threonine-protein kinase tousled-like 1	TLK1	11.1785	11.3027	9.34506	11.312	10.6986	11.3979	10.8546	10.5922	11.154	11.1581
	0.915516	1.23743	Q86UE8	Serine/threonine-protein kinase tousled-like 2	TLK2	10.0942	12.4526	12.8291	12.6378	13.6437	13.4779	11.4098	11.7801	11.7391	10.2115
	0.0118154	0.0215073	Q9Y490	Talin-1	TLN1	10.7267	11.4287	13.1311	12.7433	12.702	12.742	12.4895	10.766	12.8554	12.7857
	0.0681273	-0.128108	Q9UM00	Transmembrane and coiled-coil domain-containing protein 1	TMCO1	13.0091	10.8761	11.546	11.2795	12.2928	10.8682	9.99845	11.6312	12.4185	13.0454
	1.30893	1.28729	Q9BVC6	Transmembrane protein 109	TMEM109	11.4316	12.4177	12.1503	12.2956	12.083	13.4272	9.67519	11.5593	12.2502	10.5698
	0.566332	-0.648681	Q9H061	Transmembrane protein 126A	TMEM126A	11.3253	11.4769	10.1428	9.41108	8.93841	10.077	10.709	11.203	11.308	10.289
	0.137363	0.182366	Q9P0S9	Transmembrane protein 14C	TMEM14C	11.528	10.6051	11.6731	9.57244	9.68507	10.8756	9.75999	10.7392	10.3054	11.092
	0.282627	-0.511695	P57088	Transmembrane protein 33	TMEM33	11.723	11.1446	11.5408	10.5915	12.051	9.07766	12.0392	10.6207	13.1893	10.2831
	0.95687	1.69327	P42166	Lamina-associated polypeptide 2, isoform alpha;Thymopoietin;Thymopentin	TMPO	16.5375	16.3953	16.2645	16.6177	16.8561	15.9048	12.5274	13.5631	17.9412	14.9126
	0.204025	-0.300882	Q03169	Tumor necrosis factor alpha-induced protein 2	TNFAIP2	9.96475	11.9707	11.6276	9.90582	9.96814	11.8487	12.1487	10.5116	11.0081	11.0588
	1.38405	0.717775	Q92973	Transportin-1	TNPO1	16.6306	16.2109	16.2116	16.2361	16.1874	15.4797	15.2408	15.5372	16.1748	14.8137
	0.0421118	-0.0713017	Q96GM8	Target of EGR1 protein 1	TOE1	11.9977	13.2811	11.9711	11.1549	12.141	9.98583	11.5095	12.218	12.274	11.3049
	0.584154	0.510623	Q15785	Mitochondrial import receptor subunit TOM34	TOMM34	10.069	10.0359	10.0464	11.6895	10.6571	11.1843	9.50618	10.6031	9.72338	10.5797
	0.922338	0.614036	O96008	Mitochondrial import receptor subunit TOM40 homolog	TOMM40	10.4469	11.4831	11.5515	10.8579	10.3327	11.1583	10.2018	10.7864	10.8575	9.58504
	0.142957	-0.370087	O94826	Mitochondrial import receptor subunit TOM70	TOMM70A	12.4757	10.4387	11.58	11.2093	12.7821	12.9313	13.2541	10.593	10.3771	14.8675
	1.13302	1.18955	Q96HA7	Tonsoku-like protein	TONSL	13.8644	10.7895	11.8049	11.9044	12.6424	11.6966	10.1201	11.4506	11.2097	10.9294
	1.46078	2.19375	P11387	DNA topoisomerase 1	TOP1	18.4429	18.2579	18.1827	17.9782	18.6331	17.9475	13.1772	17.526	17.873	15.6103
	1.32129	0.882294	Q13472	DNA topoisomerase 3-alpha	TOP3A	11.4971	10.5397	11.9012	11.9889	12.3412	11.4351	10.2479	10.431	11.3998	10.8609
	1.43955	1.80787	Q92547	DNA topoisomerase 2-binding protein 1	TOPBP1	13.3544	11.7028	12.3182	13.1999	11.7038	13.5187	8.96396	11.7609	12.2193	10.3562
	0.97962	-1.33839	Q5JTV8	Torsin-1A-interacting protein 1	TOR1AIP1	11.9654	10.7291	11.3636	10.0435	9.47745	10.1364	10.7879	11.5629	14.0218	11.4579
	1.15584	2.79277	P60174	Triosephosphate isomerase	TPI1	17.9399	17.6142	17.851	18.2705	18.0548	17.0155	16.2821	16.1093	17.5104	10.091
	1.27956	1.18981	P12270	Nucleoprotein TPR	TPR	17.5181	17.7577	17.6586	17.4109	17.6926	17.027	16.1052	15.1976	18.1502	15.8311
	0.135738	0.240477	P62995	Transformer-2 protein homolog beta	TRA2B	12.9796	10.2484	10.5183	9.734	9.73191	11.1441	9.73197	10.9439	10.144	11.1225
	0.470425	-0.364311	Q12931	Heat shock protein 75 kDa, mitochondrial	TRAP1	19.524	19.227	19.2983	18.8394	19.3928	20.5075	20.4441	19.6526	19.1725	20.0473
	0.161016	0.165081	O15164	Transcription intermediary factor 1-alpha	TRIM24	11.0256	11.7222	10.3875	10.4772	10.4788	9.92373	11.1146	9.72032	10.832	10.3494
	1.28883	-0.935079	Q14258	E3 ubiquitin/ISG15 ligase TRIM25	TRIM25	10.823	10.868	10.9298	9.98403	10.6322	12.2825	12.067	12.0777	11.329	11.9463
	0.0381205	-0.0324344	Q14669	E3 ubiquitin-protein ligase TRIP12	TRIP12	11.6551	11.3848	11.1697	11.7188	10.9986	10.6871	10.6054	11.5275	11.9044	11.1684
	0.271838	0.852041	Q7L0Y3	Mitochondrial ribonuclease P protein 1	TRMT10C	11.4161	10.3594	12.3435	10.9053	13.5415	15.9063	13.6309	9.98274	9.69003	12.9361
	0.348995	0.718749	Q9UI30	Multifunctional methyltransferase subunit TRM112-like protein	TRMT112	12.5736	10.6762	11.2659	12.0064	9.81548	9.48869	10.0025	12.595	9.6933	8.7185
	0.195695	0.166575	Q7Z2T5	TRMT1-like protein	TRMT1L	9.7308	11.1664	10.276	10.6936	10.5585	10.4633	10.3625	10.3928	9.51864	10.9856
	0.528758	0.839404	P10155	60 kDa SS-A/Ro ribonucleoprotein	TROVE2	13.1514	10.7035	10.3703	11.8141	13.5656	11.4346	9.99866	11.7918	11.7597	10.452
	0.525992	1.06	Q9Y4A5	Transformation/transcription domain-associated protein	TRRAP	13.1215	12.9443	13.2679	12.2811	11.2513	10.6413	9.85146	9.89236	14.0229	10.9981
	0.287036	-0.655589	P43897	Elongation factor Ts, mitochondrial	TSFM	16.4025	15.9708	16.605	15.8943	12.6461	17.4495	17.4557	16.6416	14.7818	17.0554
	0.188339	-0.511939	Q16762	Thiosulfate sulfurtransferase	TST	14.3714	13.5668	13.5819	10.892	14.1942	15.7535	15.1644	14.3838	11.6887	15.7174
	0.576728	-0.701269	Q5R3I4	Tetratricopeptide repeat protein 38	TTC38	11.9866	9.45042	10.3996	9.71783	11.6513	9.68863	10.8982	11.8554	11.1495	10.8314
	0.540218	0.896764	Q14166	Tubulin--tyrosine ligase-like protein 12	TTLL12	12.9762	13.0212	9.73939	11.9262	10.0664	11.4841	10.4291	10.6321	11.7579	9.7362
	0.434246	0.97105	Q8WZ42	Titin	TTN	11.1628	12	8.81268	14.2119	10.8374	11.6288	9.20251	11.3773	11.6556	9.64943
	2.43084	-0.560051	P68363	Tubulin alpha-1B chain	TUBA1B	20.7856	20.6945	20.7974	20.6971	20.6816	21.0828	21.0964	21.7095	21.1334	21.4603
	0.0925118	-0.196054	Q9BQE3	Tubulin alpha-1C chain	TUBA1C	12.8281	11.2708	10.4626	10.6855	10.9347	10.9246	9.69346	10.704	11.5599	13.5644
	0.331536	-0.620514	P68366	Tubulin alpha-4A chain	TUBA4A	12.3819	10.7449	10.8059	9.94775	11.805	12.8029	12.0597	14.1298	11.0225	10.9289
	2.1583	-0.520969	P07437	Tubulin beta chain	TUBB	20.055	20.1401	20.2201	19.998	20.1202	20.7009	20.5569	20.9065	20.6291	20.8142
	0.26835	0.419571	Q13509	Tubulin beta-3 chain	TUBB3	10.7623	13.5075	11.1287	11.5667	11.0413	11.5863	10.5738	10.7744	12.7554	10.6134
	1.74206	-0.863692	P68371;P04350	Tubulin beta-4B chain;Tubulin beta-4A chain	TUBB4B;TUBB4A	16.6711	16.3866	16.615	16.001	16.5468	17.57	17.257	17.7111	17.2049	17.8088
	0.329489	-0.920287	Q9BUF5	Tubulin beta-6 chain	TUBB6	10.8072	11.1317	10.0917	13.0039	8.62103	13.4603	9.6113	11.4442	13.7333	13.6363
	0.562472	-0.416035	P49411	Elongation factor Tu, mitochondrial	TUFM	20.9573	20.6942	20.7768	20.1287	20.4559	21.7963	21.6536	21.2101	20.4895	21.517
	2.06451	0.54835	P10599	Thioredoxin	TXN	15.2334	14.9469	15.591	15.1767	15.6197	15.435	15.0422	14.7217	14.8504	14.5274
	0.705826	1.59924	Q9BRA2	Thioredoxin domain-containing protein 17	TXNDC17	14.7205	11.3059	11.2589	15.1181	14.8811	14.3652	14.4272	11.6372	11.2783	10.6935
	0.412469	0.568401	Q9H3M7	Thioredoxin-interacting protein	TXNIP	10.6681	11.4575	11.913	11.8654	11.1669	10.5185	8.72865	10.7924	11.7583	11.5066
	0.227411	0.557981	O43396	Thioredoxin-like protein 1	TXNL1	12.7082	11.2929	10.0038	14.276	11.109	11.0275	10.4729	10.8879	13.5008	9.85137
	1.11508	1.86096	Q16881	Thioredoxin reductase 1, cytoplasmic	TXNRD1	13.5904	13.2481	13.6521	14.4312	14.1131	10.6005	10.7454	10.6068	13.6487	10.6455
	0.107536	-0.168454	Q9NNW7	Thioredoxin reductase 2, mitochondrial	TXNRD2	10.7684	10.7388	11.5735	9.43984	10.9288	11.4992	9.71672	12.1014	10.4683	11.6864
	0.00641026	0.00812284	Q16222;Q3KQV9	UDP-N-acetylhexosamine pyrophosphorylase;UDP-N-acetylgalactosamine pyrophosphorylase;UDP-N-acetylglucosamine pyrophosphorylase;UDP-N-acetylhexosamine pyrophosphorylase-like protein 1	UAP1;UAP1L1	10.7618	10.6175	11.4986	10.4941	11.2452	10.2737	11.8486	10.7784	9.65234	10.9488
	0.908286	0.277679	P62987;P62979;P0CG47;P0CG48;A0A2R8Y422	Ubiquitin-60S ribosomal protein L40;Ubiquitin;60S ribosomal protein L40;Ubiquitin-40S ribosomal protein S27a;Ubiquitin;40S ribosomal protein S27a;Polyubiquitin-B;Ubiquitin;Polyubiquitin-C;Ubiquitin	UBA52;RPS27A;UBB;UBC	20.6783	20.8966	20.7879	20.5011	20.7699	20.5747	19.9257	20.5979	20.7616	20.4098
	0.929621	-0.626927	O00762	Ubiquitin-conjugating enzyme E2 C	UBE2C	10.6968	11.8042	10.5478	10.0881	11.3418	10.7246	11.3795	10.9175	11.7769	11.9028
	0.311165	-0.449671	P62837;P61077	Ubiquitin-conjugating enzyme E2 D2;Ubiquitin-conjugating enzyme E2 D3	UBE2D2;UBE2D3	10.5001	10.8933	11.2552	12.0522	9.09558	10.7616	10.8486	10.3451	12.5166	11.1271
	0.636379	0.78862	P61081	NEDD8-conjugating enzyme Ubc12	UBE2M	13.7543	13.4069	12.709	13.9254	13.7588	13.6214	13.4661	10.6381	13.0729	13.7856
	0.148858	-0.305997	P61088	Ubiquitin-conjugating enzyme E2 N	UBE2N	10.4961	10.7919	12.5237	12.9968	9.59094	12.6813	11.3194	10.9484	12.8938	12.1162
	0.371324	0.481975	Q16763	Ubiquitin-conjugating enzyme E2 S	UBE2S	12.7533	11.0246	10.6978	12.147	10.6178	10.4123	9.85732	10.4552	11.4343	11.4271
	0.973311	1.19227	Q9NPD8	Ubiquitin-conjugating enzyme E2 T	UBE2T	11.0563	10.5416	12.1109	13.1051	13.1359	13.0263	11.8904	10.7644	11.1901	10.0368
	0.0324623	-0.0734317	Q13404;Q15819	Ubiquitin-conjugating enzyme E2 variant 1;Ubiquitin-conjugating enzyme E2 variant 2	UBE2V1;UBE2V2	12.2132	10.8009	10.8296	11.4071	10.7291	9.74083	11.4152	9.1503	13.1435	10.3985
	0.809375	-0.527755	Q9BZL1	Ubiquitin-like protein 5	UBL5	10.3797	10.8891	10.7486	10.8382	10.3587	11.1262	11.2365	10.9038	12.3066	10.5578
	0.182321	-0.397366	Q9NRR5	Ubiquilin-4	UBQLN4	10.3082	10.9621	9.53712	13.4069	9.74249	10.9349	9.47906	12.2882	11.3162	11.7671
	0.372678	0.845458	O95071	E3 ubiquitin-protein ligase UBR5	UBR5	13.1102	13.1274	9.91015	13.7908	10.7556	9.79016	10.6101	11.569	11.8558	9.57286
	0.415844	0.951571	P17480	Nucleolar transcription factor 1	UBTF	15.2316	12.5234	10.637	10.6434	13.5755	10.8292	10.965	10.4164	12.5863	11.186
	0.156561	-0.189104	Q9Y5K5	Ubiquitin carboxyl-terminal hydrolase isozyme L5	UCHL5	10.3468	9.81543	10.7698	11.2796	11.4371	10.8338	10.322	11.2638	12.0544	10.1046
	0.614808	0.839905	P13051	Uracil-DNA glycosylase	UNG	11.1639	13.0522	10.7416	10.9839	13.1995	10.3745	10.0506	10.8722	11.4659	10.5954
	0.0315544	0.0358816	Q92900	Regulator of nonsense transcripts 1	UPF1	10.3894	11.0478	12.4391	10.8621	10.9524	11.3516	10.7608	11.408	11.6218	10.7608
	0.11193	-0.225173	Q9UDW1	Cytochrome b-c1 complex subunit 9	UQCR10	10.7587	10.695	11.946	12.6709	11.1896	11.536	10.6824	11.5639	14.0448	10.4738
	0.346569	-0.417382	P31930	Cytochrome b-c1 complex subunit 1, mitochondrial	UQCRC1	16.7977	16.3314	16.2907	15.2818	16.5626	17.8261	17.8883	16.5103	16.0875	17.2436
	0.624412	1.48514	P22695	Cytochrome b-c1 complex subunit 2, mitochondrial	UQCRC2	16.4995	15.8318	16.0158	15.6834	16.1829	16.8315	17.3806	10.7272	14.516	16.1322
	0.125729	0.284719	P47985;P0C7P4	Cytochrome b-c1 complex subunit Rieske, mitochondrial;Cytochrome b-c1 complex subunit 11;Putative cytochrome b-c1 complex subunit Rieske-like protein 1	UQCRFS1;UQCRFS1P1	14.0332	12.6465	11.3763	10.56	10.4524	13.1178	13.1185	11.7545	11.6294	10.4828
	0.595535	0.774291	P06132	Uroporphyrinogen decarboxylase	UROD	12.7681	12.045	10.1893	10.0452	11.4235	11.9942	9.90612	10.4202	11.6769	10.5432
	0.330925	0.324619	P51784	Ubiquitin carboxyl-terminal hydrolase 11	USP11	11.0871	11.2428	10.8624	10.6939	12.2439	10.8642	11.6569	10.5759	11.2721	9.85955
	1.32118	1.91286	P54578	Ubiquitin carboxyl-terminal hydrolase 14	USP14	12.9149	12.7256	13.0236	13.9068	10.1219	13.1823	9.744	12.4847	10.5385	10.1647
	0.14876	-0.135076	Q9Y6I4	Ubiquitin carboxyl-terminal hydrolase 3	USP3	11.368	10.1639	11.1163	10.8486	11.6946	11.2495	11.191	11.9893	10.6349	11.0191
	0.820633	-0.572955	Q86UV5	Ubiquitin carboxyl-terminal hydrolase 48	USP48	10.9367	10.2867	10.6675	9.99192	10.9745	9.69103	11.4537	10.3292	10.6261	11.5818
	0.243332	0.329437	Q9Y5J1	U3 small nucleolar RNA-associated protein 18 homolog	UTP18	12.3858	11.802	10.8402	10.4474	10.5758	10.8652	10.0405	10.0437	11.0666	12.1424
	0.20494	0.331039	P46939	Utrophin	UTRN	9.34648	11.5706	9.36519	12.0931	10.4637	11.5539	10.7451	10.7664	10.5441	9.54899
	1.32045	1.95915	O95183	Vesicle-associated membrane protein 5	VAMP5	13.8465	9.70126	13.3511	13.0211	13.384	14.219	10.6524	11.2296	10.8494	11.1139
	0.547764	-0.91188	O95292;Q9P0L0	Vesicle-associated membrane protein-associated protein B/C;Vesicle-associated membrane protein-associated protein A	VAPB;VAPA	9.2536	12.0741	11.2127	9.70376	9.6313	10.9953	13.0779	10.7232	11.9011	9.85923
	0.807942	-0.942461	P26640	Valine--tRNA ligase	VARS	10.8582	10.9878	10.6182	11.2104	11.5187	9.41117	10.7814	12.2661	13.1249	10.6671
	0.17168	-0.429515	P18206	Vinculin	VCL	9.70732	11.357	13.2701	12.4612	11.6715	13.8127	13.9371	10.3166	13.3759	12.275
	1.51816	2.19799	P55072	Transitional endoplasmic reticulum ATPase	VCP	15.5193	14.6346	14.4661	13.6707	15.2879	15.066	13.3256	11.3416	14.9403	10.697
	0.649441	0.728635	P21796	Voltage-dependent anion-selective channel protein 1	VDAC1	17.6795	16.5319	17.2594	15.3461	17.188	16.9622	17.0564	16.4816	14.8953	15.9635
	0.351443	-0.233794	P45880	Voltage-dependent anion-selective channel protein 2	VDAC2	17.5111	16.24	17.4596	16.9961	17.6522	17.6434	17.7769	17.3707	17.3957	17.3936
	0.818668	1.58961	Q9Y277	Voltage-dependent anion-selective channel protein 3	VDAC3	14.1367	12.6956	13.816	9.92051	13.2419	12.6273	13.5469	10.6218	9.87047	10.561
	0.329556	-0.161074	P08670	Vimentin	VIM	18.1733	18.1651	18.4063	18.5342	18.3905	18.4198	18.4581	17.8594	19.0589	18.6607
	0.987298	1.6208	Q9Y4B6	Protein VPRBP	VPRBP	14.4537	11.1686	11.2459	13.9369	13.1825	10.3271	10.4162	11.3357	10.4517	10.8565
	0.0745255	-0.203479	Q96QK1	Vacuolar protein sorting-associated protein 35	VPS35	12.6856	10.8771	13.3059	9.98131	12.4357	13.4159	9.71506	13.5012	12.99	13.0753
	0.170827	-0.25952	Q9UN37;O75351;Q6PIW4	Vacuolar protein sorting-associated protein 4A;Vacuolar protein sorting-associated protein 4B;Fidgetin-like protein 1	VPS4A;VPS4B;FIGNL1	11.1895	10.207	9.71069	12.2947	10.1887	11.8477	10.3425	10.9051	11.9914	11.4247
	0.386181	0.899873	Q99986	Serine/threonine-protein kinase VRK1	VRK1	13.5566	11.9449	10.585	13.1677	10.6871	9.79124	8.48677	12.3603	10.2248	11.817
	0.98401	-0.947502	O00534	von Willebrand factor A domain-containing protein 5A	VWA5A	10.3987	10.2408	9.95518	11.0501	10.2259	10.8582	9.64506	12.18	12.0861	11.698
	0.260289	-0.428311	A3KMH1	von Willebrand factor A domain-containing protein 8	VWA8	11.1446	11.2604	10.4812	10.3174	10.192	12.86	12.9655	10.5627	10.5252	11.8303
	0.419189	0.694468	Q96SY0	von Willebrand factor A domain-containing protein 9	VWA9	13.9934	12.1685	10.0442	11.048	11.2442	10.8326	11.1326	11.5113	10.8273	9.97159
	0.49839	0.850554	Q7Z5K2	Wings apart-like protein homolog	WAPAL	11.0009	10.0255	10.9145	13.2989	12.995	12.9874	10.3401	10.7698	12.3882	10.5812
	0.1333	-0.178365	Q9GZL7	Ribosome biogenesis protein WDR12	WDR12	11.3377	11.2607	10.739	11.2228	9.75229	11.3131	10.1671	11.5422	12.3389	10.4158
	0.323132	0.367815	Q9BV38	WD repeat-containing protein 18	WDR18	10.6311	11.1879	13.2153	11.1116	11.8229	11.1829	11.0687	11.744	10.8568	10.9604
	0.219594	0.335703	Q9UNX4	WD repeat-containing protein 3	WDR3	12.3602	11.7856	10.6687	12.8606	10.3917	11.3598	10.7076	11.8797	12.2033	10.151
	1.01543	1.25595	P61964	WD repeat-containing protein 5	WDR5	13.5193	10.8443	10.3811	12.3765	13.4038	12.3643	10.6229	11.0105	11.1533	10.7824
	1.01758	1.36956	Q9GZS3	WD repeat-containing protein 61;WD repeat-containing protein 61, N-terminally processed	WDR61	11.0021	13.3026	10.77	13.4587	13.1686	11.0235	11.4952	10.9676	10.7716	9.77105
	0.832135	1.40008	Q9NW82	WD repeat-containing protein 70	WDR70	14.1402	11.1475	13.9653	11.7458	14.1645	10.4088	11.6389	11.1484	10.9268	11.067
	0.0986792	-0.101075	Q6RFH5	WD repeat-containing protein 74	WDR74	10.9394	10.3198	10.4058	11.8326	9.96853	11.3617	11.2567	10.9956	10.513	10.8576
	0.485264	0.714822	Q8IWA0	WD repeat-containing protein 75	WDR75	13.5923	10.5345	11.7633	11.297	10.6673	10.1327	9.71546	11.1252	10.9649	10.6598
	0.252414	0.543583	Q9H967	WD repeat-containing protein 76	WDR76	12.8666	12.9837	10.2273	10.2048	9.59015	9.42511	11.5998	10.1881	9.88616	9.68345
	0.0684283	-0.115694	Q6UXN9	WD repeat-containing protein 82	WDR82	11.206	10.7556	11.7456	12.464	9.63943	9.52176	11.3124	11.0849	11.1238	10.4966
	0.817221	-0.512365	Q14191	Werner syndrome ATP-dependent helicase	WRN	10.0818	10.2845	10.3969	10.223	10.8792	10.1193	11.1731	11.4023	9.7774	11.0196
	0.0701748	-0.108617	Q96QU8	Exportin-6	XPO6	12.2587	10.3218	11.9717	9.97639	11.1079	10.1076	10.8379	11.0472	11.9258	10.453
	0.925886	1.50987	Q9UIA9	Exportin-7	XPO7	12.9152	13.1026	12.727	13.2893	13.0991	10.0906	9.72673	10.6457	13.2302	10.5071
	1.10339	1.66607	P18887	DNA repair protein XRCC1	XRCC1	13.0696	12.191	9.52492	13.796	13.5442	11.6587	10.4828	11.3174	10.3303	10.3948
	0.315591	-0.460496	Q9H0D6	5-3 exoribonuclease 2	XRN2	9.76227	10.8282	10.9277	13.0446	10.2182	9.98267	10.7603	11.5419	11.1894	11.5262
	0.303129	-0.707664	Q9Y2Z4	Tyrosine--tRNA ligase, mitochondrial	YARS2	14.7422	14.2175	14.7186	10.6002	13.7655	16.1953	14.9904	15.1267	13.6903	15.1828
	2.04066	0.859169	P62258	14-3-3 protein epsilon	YWHAE	18.2215	17.7346	18.2627	18.1288	18.5412	17.6198	17.2147	16.8624	17.8662	16.9592
	0.43212	-0.700194	P61981	14-3-3 protein gamma;14-3-3 protein gamma, N-terminally processed	YWHAG	10.5939	11.3432	10.5814	9.2774	9.53616	10.3367	9.60997	11.7012	12.8721	9.73002
	0.216449	0.542618	P27348	14-3-3 protein theta	YWHAQ	13.7764	13.3302	13.6694	9.28316	13.1655	10.8512	10.9329	11.1011	12.9394	12.2402
	0.0773574	-0.232761	Q8N4Q0	Zinc-binding alcohol dehydrogenase domain-containing protein 2	ZADH2	13.4026	10.0351	13.1379	13.4149	10.0956	14.0883	12.8824	13.6959	10.4181	13.3844
	1.01225	1.82649	Q9NUA8	Zinc finger and BTB domain-containing protein 40	ZBTB40	15.3348	15.4404	15.3	15.2334	13.6821	15.4935	11.6344	15.2293	10.9338	15.2194
	0.745206	1.60498	O75152	Zinc finger CCCH domain-containing protein 11A	ZC3H11A	13.3915	14.3562	9.77712	14.6454	14.4169	11.6977	10.7413	10.6565	13.1609	11.2113
	0.0493033	0.0570152	O60293	Zinc finger C3H1 domain-containing protein	ZFC3H1	10.5285	11.9941	11.4666	10.5166	9.99293	10.8066	11.2356	10.2405	11.0867	10.746
	0.174448	0.271148	Q96JP5	E3 ubiquitin-protein ligase ZFP91	ZFP91	11.3475	11.0683	11.3634	12.926	10.4635	11.1392	9.64673	11.8403	12.1311	10.8359
	0.0214696	0.0314667	Q96KR1	Zinc finger RNA-binding protein	ZFR	11.8482	10.0532	10.5311	10.9221	11.8539	9.75372	10.4977	10.1567	11.277	11.2508
	1.5154	2.25911	Q9UBW7	Zinc finger MYM-type protein 2	ZMYM2	15.7412	16.0446	14.672	13.3341	14.3729	12.0433	11.241	11.5069	13.4712	12.2166
	0.372393	-0.632813	Q9UQR1	Zinc finger protein 148	ZNF148	12.5129	10.5523	9.62189	11.0567	9.77536	9.90929	9.30111	11.9449	11.8848	11.6861
	0.863743	1.45945	O43670	BUB3-interacting and GLEBS motif-containing protein ZNF207	ZNF207	13.3896	12.4225	12.7383	10.4671	14.6905	10.3238	10.4605	10.7724	11.5097	10.7742
	0.0122739	-0.0183562	P17036	Zinc finger protein 3	ZNF3	11.6619	10.898	11.4075	10.9591	12.1896	10.7217	10.3341	10.4873	12.0363	12.4409
	0.764132	0.386218	Q5BKZ1	DBIRD complex subunit ZNF326	ZNF326	10.9004	10.4364	10.9959	10.3137	11.47	10.7296	10.9098	10.471	10.2462	10.0588
	0.168835	0.297241	Q8TF68	Zinc finger protein 384	ZNF384	12.3203	11.0337	12.86	10.2771	10.4167	10.9084	10.5632	12.6336	10.5859	10.2391
	0.196577	-0.647729	Q86V71	Zinc finger protein 429	ZNF429	10.7631	14.4767	14.7629	15.1112	13.2625	14.0986	15.4136	10.4798	15.6837	15.9972
	0.451828	0.231261	Q6ZN08	Putative zinc finger protein 66	ZNF66	10.9375	10.5749	10.9192	11.7837	10.7965	10.9303	11.0131	10.6313	10.9387	10.4532
	0.111661	-0.090646	P0CJ79;Q9NV72;Q7L2R6;Q5VIY5;P17035;Q86YE8;Q6ZN06;A2RRD8;Q76KX8;Q9H7R5;Q0VGE8;P59923;Q96IR2;Q08AN1	Zinc finger protein 888;Zinc finger protein 701;Zinc finger protein 765;Zinc finger protein 468;Zinc finger protein 28;Zinc finger protein 573;Zinc finger protein 813;Zinc finger protein 320;Zinc finger protein 534;Zinc finger protein 665;Zinc finger protein 816;Zinc finger protein 445;Zinc finger protein 845;Zinc finger protein 616	ZNF888;ZNF701;ZNF765;ZNF468;ZNF28;ZNF573;ZNF813;ZNF320;ZNF534;ZNF665;ZNF816;ZNF445;ZNF845;ZNF616	11.1543	10.2731	10.5958	10.5473	11.5375	11.0619	10.7073	11.0254	10.4915	11.5849
